# Supplementary material for: A High Resolution Genetic Map Anchoring Scaffolds of the Sequenced Watermelon Genome
Source: PLoS One. 2012 Jan 11;7(1):e29453. doi: 10.1371/journal.pone.0029453 (PMC3256148; doi:10.1371/journal.pone.0029453)
Supplement: Table S1 — SSR, InDel and SV markers used to construct the saturated genetic map of watermelon for scaffold anchoring. Their chromosome, bin position, genetic distance (cM), marker name, repeat motif, scaffold name, primer start, primer end, production size from 97103 and primer sequences are listed. (XLS) [file pone.0029453.s001.xls]

## Sheet: Sheet1
Supplementary Table 1. SSR, InDel and SV markers used to construct the saturated genetic map of watermelon for scaffold anchoring. Their chromosome , bin position, genetic distance (cM), marker name, repeat motif, scaffold name, primer start, primer end, production size from 97103 and primer sequences are listed.
Chromosomes	Bins	Genetic distance （cM）	Marker name	Marker type	Repeatmotif	Scaffold name	Primer start	Primer end	Production size	Forward primer	Reverse primer
Chromosome 1	1Bin1	0	BVWS02314	SSR	(TGA)12	scaffold1481	83942	84222	281	AATACTCCTCCTATTCCTTC	TTACTTTGCTTCAATTCTTC
Chromosome 1	1Bin1	0	BVWS02313	SSR	(TAT)6	scaffold1481	84200	84416	217	GGAGGTATTGGACTGAAGGT	GAAGAAGGAATAGGAGGAGT
Chromosome 1	1Bin2	5.009	BVWS02309	SSR	(AG)13	scaffold1481	655755	655903	149	AATCTCCACTACAATCCACCAG	TTCCTCCAAACTCATCATTACC
Chromosome 1	1Bin3	7.056	BVWS01116	SSR	(ATT)9	scaffold1481	1100031	1100261	231	TGGCTTGAATTTTGGAAACC	GAGCTTCCACACCTGAATTTT
Chromosome 1	1Bin3	7.056	BVWS01835	SSR	(AT)9	scaffold1481	1150489	1150713	225	ATGTAAGGACGGAAAAGCGA	AAAGATGTTACCAAAAATATCCTTGAA
Chromosome 1	1Bin3	7.056	BVWS01836	SSR	(AAT)8	scaffold1481	1185151	1185437	287	AGAGGAGTCCAAAGGTGCAA	CACTTGGTTCTGCATTGAGG
Chromosome 1	1Bin3	7.056	BVWS02302	SSR	(TTA)7	scaffold27	497708	497879	172	AAGAGCTGAGCCTTATAG	AGAAAAGGATTGAAGATG
Chromosome 1	1Bin4	12.334	BVWS00034	SSR	(AG)10	scaffold27	801266	801422	157	TAATGGAAAGCTCTGGCTGTCTTC	ACTAACCGCTTTCTTCCACTTTCC
Chromosome 1	1Bin5	15.104	BVWS00291	SSR	(AT)11	scaffold27	1275448	1275727	280	GAAAGTTGACAAGCGATCTCAAAA	CCAGACCTTCAATTTTATGTCCAA
Chromosome 1	1Bin5	15.104	BVWS02003	SSR	(ATG)6	scaffold27	1439059	1439284	226	GCATTTTCTTGCCGCTAAAG	TGCATCGAGATCCATACAAA
Chromosome 1	1Bin6	15.964	BVWS02475	SSR	(TA)9g(AT)6	scaffold27	1690351	1690550	200	AAAATGACAGTGGATGGAAAAA	TGCTTCATGGGATTTAATTTG
Chromosome 1	1Bin6	15.964	BVWS02476	SSR	(AAT)8	scaffold27	1787826	1788076	251	TTGTAGGGCCAATGTTTTCC	CATGAGTTGAGAATGGTGCAT
Chromosome 1	1Bin6	15.964	BVWS01166	SSR	(TTA)6	scaffold27	2455388	2455577	190	ATCGATGATGATGGAAAGGC	TTGATTGATCGTTTGCCAGA
Chromosome 1	1Bin7	19.501	BVWS02102	SSR	(AG)9	scaffold27	2924779	2924923	145	TAAGAGAGGCCGCACTGAAT	ATCCCTAAGCTTTGCCACAC
Chromosome 1	1Bin8	25.4	BVWI00072	InDel		scaffold619	620789	620938	150	CCCAATGTACTCTTGCATGG	CAAGCACTTGGGTCAAAACA
Chromosome 1	1Bin9	27.428	BVWI00103	InDel		scaffold619	350621	350770	150	TAATCGAGGCACGCTTTTGT	TCTAAAGAACTTGAGATTTAATGGGAT
Chromosome 1	1Bin9	27.428	BVWI00191	InDel		scaffold1911	139116	139195	80	AGTGATAGTTATGGAATTGGATGTAGA	TGACCACAATAGGATTTAGAGTTTGC
Chromosome 1	1Bin9	27.428	BVWI00192	InDel		scaffold1911	615092	615241	150	GGTGACCATAGGCAACTAGG	CAATTTCTTCAGGAGGTGAGT
Chromosome 1	1Bin9	27.428	BVWS01168	SSR	(TC)8	scaffold1911	776587	776794	208	GCCTCTTCTCCCATTGTTTG	AGGGCACAAGAACAAATACAA
Chromosome 1	1Bin9	27.428	BVWS01114	SSR	(GA)8	scaffold1546	725031	725302	272	GGATTTTAGTTTTTCCACCCC	TTTTGGGAAGCAATTAATTATGA
Chromosome 1	1Bin9	27.428	BVWS02276	SSR	(CCTTTC)3	scaffold1546	934816	934967	152	CCTTATCCCTTCCCTACC	ATGCCATCAACTCATAGA
Chromosome 1	1Bin10	43.347	BVWS00255	SSR	(AAT)11	scaffold638	180579	180731	153	AGCATGAGAGTCCTCACCAAAGAC	TTAGAGAGGAGACCAAACTTGCCA
Chromosome 1	1Bin10	43.347	BVWS00166	SSR	(TC)21	scaffold638	227568	227730	163	GGAAGCTCAAACCTGATTGAAAAC	GAGGGGAGGGGTTGTAAGACTTTA
Chromosome 1	1Bin10	43.347	BVWS02311	SSR	(TC)8	scaffold638	590443	590707	265	ATTAAAATCTCCTTTTTATC	GTCGGCTCGGAGATTCACAT
Chromosome 1	1Bin10	43.347	BVWS00376	SSR	(TC)12	scaffold638	1118530	1118653	124	CCCAATTCTTCAATTCCTCACAAC	TCGCTGCTTCTGTTACAAGAGGAT
Chromosome 1	1Bin11	50.655	BVWS02029	SSR	(AGAA)10	scaffold74	2158946	2159038	93	GTATGGGGGAAGAGGAGAGG	TTAGCTTCCAAACAGGCAGC
Chromosome 1	1Bin12	51.576	BVWS02423	SSR	(CA)11	scaffold74	1186821	1186987	167	GTTGCCGGTACTGCTCATCT	TGCAAAAGGAAGCATCATCA
Chromosome 1	1Bin12	51.576	BVWS01576	SSR	(TAT)6	scaffold19	268741	269007	267	AATTTAGGGCCCGCTTTTT	CCATTTCCTCTTCTCCCACC
Chromosome 1	1Bin12	51.576	BVWI00117	InDel		scaffold140	308773	308920	148	AGGAGAAAGGATACCGACTTG	TCTAATAGGACACTAAACATTCAACT
Chromosome 1	1Bin12	51.576	BVWI00118	InDel		scaffold140	309133	309276	144	TCTTTATCTCACCCTTCATGATATTAG	GGAAAGATGGGAGTTACCCAA
Chromosome 1	1Bin12	51.576	BVWS01404	SSR	(GA)6	scaffold140	408321	408585	265	TGTCGGCAACATGTTTTAGC	TTTCGATTTAAAATTAGGTAGCCA
Chromosome 1	1Bin12	51.576	BVWS00602	SSR	(AT)7	scaffold255	70933	71077	145	CTGAGAGAGAGAACCCGTCG	TTGTGTTTTGGGAGGAGGAA
Chromosome 1	1Bin12	51.576	BVWS01041	SSR	(TA)6	scaffold501	271630	271792	163	GAGACCCTTCCATTGGGAAT	AGGTGGTTTAGTGGTGGCAG
Chromosome 1	1Bin12	51.576	BVWS00845	SSR	(AAT)5	scaffold501	523547	523780	234	CCAACGTCTTAAATTTTCTCCAA	TTGCCTCCCATCACTTTTTC
Chromosome 1	1Bin12	51.576	BVWS02244	SSR	(TC)3gca(TC)3	scaffold528	411239	411538	300	TAAAGTAATTGGAATGCTGA	GACCGATAAATGATAGATGG
Chromosome 1	1Bin12	51.576	BVWS02363	SSR	(AAAAC)5	scaffold528	659640	659851	212	TTGGAGTGGTCTTTTGAGTCC	AAGTCCAGCCAAATGTGGAA
Chromosome 1	1Bin13	52.074	BVWI00177	InDel		scaffold736	180834	180954	121	AGTACAGAAAACTGACAGGGT	GAGACATGCTTGGGGAGTAT
Chromosome 1	1Bin13	52.074	BVWS01771	SSR	(AT)6	scaffold736	199615	199831	217	AGAGGTTGTTTGGGACACTGA	TCCCAAAACTACCAACAGTGC
Chromosome 1	1Bin13	52.074	BVWS00230	SSR	(GA)16	scaffold332	439418	439513	96	GATAATGGGCACTGAACCTTTGAC	CCTAGAATATGGGGAGCTTGAACA
Chromosome 1	1Bin14	52.571	BVWS01487	SSR	(TC)7	scaffold332	811547	811812	266	AGCAAGGAGCCTTTGACAGA	TGAACTCATTACCGCTTACTGC
Chromosome 1	1Bin14	52.571	BVWV00021	SV		scaffold411	204879	205823	945	TACAACTTTTCCCGGCCAAT	AGCCTTTCCATACTCATACGG
Chromosome 1	1Bin14	52.571	BVWV00008	SV		scaffold411	165383	165879	497	GTAGTTCATTCAGCTTCGGTT	ACACTCCGTTCTACTTGGTT
Chromosome 1	1Bin15	53.072	BVWV00007	SV		scaffold411	33741	34919	1179	GATTGGATTGGGGTCTGCAA	CAAAAGGGGAGCACTTTAGC
Chromosome 1	1Bin15	53.072	BVWS00582	SSR	(CT)6	scaffold250	97706	97967	262	TCTTCTCAAGGTTTCCCCAA	GCAAACTTAATCCTTTTCACGA
Chromosome 1	1Bin15	53.072	BVWS00985	SSR	(TA)7	scaffold250	519406	519678	273	TGGTTTGATTTGCTTCACACA	TCAAAAGAAGTGATAAAGGGTTCA
Chromosome 1	1Bin15	53.072	BVWS01852	SSR	(AT)3	scaffold250	633954	634132	179	TTGAGGGAAAGAACCAAAGA	GTGAAGGAAGTACGAGCACC
Chromosome 1	1Bin15	53.072	BVWI00207	InDel		scaffold251	249463	249612	150	TAAAGATCACCCGAGAGTCG	TTTTGCATTTGTGCTTGACC
Chromosome 1	1Bin15	53.072	BVWI00208	InDel		scaffold251	255497	255641	145	AAGGATTCACTCAGCATGTC	AGGATAAAGGGACGATAGGATT
Chromosome 1	1Bin15	53.072	BVWS01351	SSR	(TA)8	scaffold251	258982	259111	130	TGTCACATGTGTTTTAAATGTTGC	TTGGCAAGTAGGTTGCAAAAC
Chromosome 1	1Bin16	53.443	BVWS00515	SSR	(TA)10	scaffold54	2179072	2179313	242	AACCAATGGGTTGAAGGTCT	AAGAAAAGGGTGCAGCACAT
Chromosome 1	1Bin16	53.443	BVWS01285	SSR	(AAAT)5	scaffold54	2749134	2749284	151	AAACCGCCTTCTTTCCAACT	TGAGATGAATTGTGCGGTTC
Chromosome 1	1Bin17	54.153	BVWS01753	SSR	(TA)15	scaffold54	706925	707099	175	CTGATGAAATTGAGTGGAGTGG	GGCAGCCTTTCTTTCAAAAT
Chromosome 1	1Bin17	54.153	BVWS02291	SSR		scaffold54	135290	135517	228	CTCATTTCTCCTCCCTCG	AAGGCATCTCATAAACACCA
Chromosome 1	1Bin17	54.153	BVWS00071	SSR	(TAT)10	scaffold54	50199	50308	110	TAATGCATTTGGTTTGTCCACATC	CCCTTCTTCCTTGCTTTACTCCTT
Chromosome 1	1Bin18	55.073	BVWS00730	SSR	(TA)8	scaffold53	46328	46591	264	TGAAGCGAGAATTCCATCAA	CGCCAAACGTATTTGGTTTT
Chromosome 1	1Bin18	55.073	BVWS01758	SSR	(AAAT)5	scaffold53	126973	127086	114	AGGAAGGGAGTGCTTCGATT	TGGGCCCTTTCTTTTTCTTT
Chromosome 1	1Bin18	55.073	BVWS01743	SSR	(CT)9	scaffold53	893728	894003	276	AATCGGAAACAAGGGGAAAG	GAAAAGAACAAATCTTTCGAATTT
Chromosome 1	1Bin18	55.073	BVWS00466	SSR	(ATT)8	scaffold53	1334317	1334455	139	CAAAATTTAAGGTTTAAAGGCCTAC	GCATAGCTAAGCAAGAATTGGC
Chromosome 1	1Bin18	55.073	BVWS01007	SSR	(ATAA)5	scaffold53	1665102	1665368	267	TTGAAAATTGGAAAAAGTTGAAAA	GAAGAGGAAATCGCCAATCA
Chromosome 1	1Bin18	55.073	BVWS01921	SSR	(AT)7	scaffold53	1750317	1750504	188	GCAGCAACCATCAGAATTTTT	CGTCAATTCGCCTTAGCTTC
Chromosome 1	1Bin18	55.073	BVWS00917	SSR	(AAT)6	scaffold53	1945691	1945920	230	AAATGGATTTGTGCTCAGGC	CGAGGGAGAAGTAGGTGTGG
Chromosome 1	1Bin18	55.073	BVWV00066	SV		scaffold53	2016314	2017225	912	TTGCATGTTCCTGATGAGAT	TATTGTGGCCCTTTTATCCT
Chromosome 1	1Bin18	55.073	BVWV00039	SV		scaffold53	2335846	2336733	888	TGCTATAAATAAGTCACAATATGAATG	AAACGGTAACTAAAGTGCAG
Chromosome 1	1Bin18	55.073	BVWS00546	SSR	(CTTTT)5	scaffold89	58637	58872	236	AGGAAAAATGTCACGGCAAC	CGGGACCAGCAAATCTCTAA
Chromosome 1	1Bin18	55.073	BVWI00200	InDel		scaffold89	137568	137715	148	TGCATTCTTTTAGTAATTTGCTGTTA	GTGATTGTTTGTCTACTCATTTAGTT
Chromosome 1	1Bin18	55.073	BVWI00201	InDel		scaffold89	189344	189490	147	TGTCAAAATTCTTTCTCTATGAGCTA	AACCATCTTGGTGCTAGAGT
Chromosome 1	1Bin18	55.073	BVWS01126	SSR	(TTA)6	scaffold89	573069	573345	277	AGATGTATGCATGTATATGTATGGG	AATACTTGCTTTTGTATGACCTTCA
Chromosome 1	1Bin18	55.073	BVWS00948	SSR	(AT)12	scaffold162	812727	812996	270	TCAAACCGACTGCCATATCA	AGCTTGTCTTCCTGGCCTTT
Chromosome 1	1Bin18	55.073	BVWS01533	SSR	(TA)8	scaffold162	825182	825349	168	ATCACACCCCCACAATCAAT	TTTGAAAAATGTAACCAACTTGTTC
Chromosome 1	1Bin18	55.073	BVWS01032	SSR	(TA)6	scaffold162	963256	963476	221	CGCCCACTAGAAGGGGTATT	GACATGCAATTTCCCCAAAG
Chromosome 1	1Bin18	55.073	BVWS00018	SSR	(TAT)8	scaffold162	1620580	1620685	106	TTGACCGTAATATAGTTGTCGTTGG	AAAAATTGTGGTAAAATACGAAGAAAAA
Chromosome 1	1Bin18	55.073	BVWS00281	SSR	(TA)13	scaffold162	2174982	2175309	328	TTTTCCCCTTCTTCCATGCTAACT	GAGGCTGTGGTTTGAAAGAAACTC
Chromosome 1	1Bin18	55.073	BVWS00707	SSR	(TTA)11	scaffold337	83550	83853	304	TGCACCTTTCCAAAATTTGTC	GGAAGCTGAACCATTTTGCT
Chromosome 1	1Bin18	55.073	BVWS00708	SSR	(TA)9(TATT)5	scaffold337	289161	289376	216	AAAAACCTTCGAAAAATGCC	ACGTGGTGATGTAGTGGGTT
Chromosome 1	1Bin18	55.073	BVWS01369	SSR	(CCCTT)6	scaffold337	393300	393507	208	GGTAGTTTTGGCCCTCACAA	GAAATTACGTGGCTGCCATT
Chromosome 1	1Bin18	55.073	BVWI00266	InDel		scaffold337	397907	398018	112	AAACATCCACAGAAGCTGTA	CACACAAAACTGGATTCTCTAA
Chromosome 1	1Bin18	55.073	BVWS02399	SSR	(AT)8	scaffold337	988054	988307	254	TGACACAAAATACGTAAAATGCAA	TGGGGAATTGAGATCCTGAG
Chromosome 1	1Bin18	55.073	BVWI00267	InDel		scaffold337	1145506	1145618	113	CAGCAATCTTCCCACTCGGT	GAGAGAGGAGAGACCGTGAC
Chromosome 1	1Bin18	55.073	BVWS00080	SSR	(CT)15	scaffold565	151719	151815	97	TCTTGCCTAAACATGAGAAAACTTCA	GAAGGGAAAATTGTTGAGATGTGG
Chromosome 1	1Bin18	55.073	BVWS01601	SSR	(AG)6	scaffold1382	32751	32967	217	CCCTCAAATTTCGATTTCCA	GCTACTCTCCTCCATTCCCC
Chromosome 1	1Bin18	55.073	BVWS00622	SSR	(AT)9	scaffold161	253933	254196	264	CCAAGAAACGAGAAATTCGG	GCAAGCTCCTCCATAAACCA
Chromosome 1	1Bin18	55.073	BVWI00122	InDel		scaffold161	210985	211115	131	TCATTCACGATAAGAGTGTCG	TCTAGGACCAAGACCTATGTT
Chromosome 1	1Bin18	55.073	BVWI00121	InDel		scaffold161	144181	144323	143	ACTTTCTCTTGCTGTATAATCTGAG	AGTTTTTCAAATGCAATCATTAACCT
Chromosome 1	1Bin19	55.713	BVWS00621	SSR	(AT)10	scaffold161	13055	13316	262	GGATGTGACTACAAGGGCAAA	CGTGTATCTTCTTGACTGATCCAA
Chromosome 1	1Bin20	76.822	BVWI00349	InDel		scaffold730	525325	525473	149	ACACACACACACAACTGCGA	CGACACATGCAAGCCACAATA
Chromosome 1	1Bin20	76.822	BVWI00350	InDel		scaffold730	531719	531814	96	ATTAACTTGTTTAAGATGGTGCAATAA	CGAATATCGACATCCACGAAT
Chromosome 1	1Bin21	77.277	BVWI00335	InDel		scaffold2716	31971	32120	150	ATGGGGAGCCAAGGGATTTC	CCAGGTTTATGGGGCTCCTG
Chromosome 1	1Bin21	77.277	BVWI00338	InDel		scaffold2716	137394	137533	140	AAACATTAGTGGGAAAGGTGA	CTCCAAACACCAAACATGAC
Chromosome 1	1Bin22	79.342	BVWS00413	SSR	(AT)6	scaffold180	186417	186690	274	CCCAACTACAACTACGATATAACAAAA	CAGATGTTGGAATGCCCTCT
Chromosome 1	1Bin22	79.342	BVWI00303	InDel		scaffold180	202144	202291	148	TGACTTTGAGGGTAGCAATCA	AGAAGACGGGTAATGTGGGA
Chromosome 1	1Bin23	81.515	BVWS02417	SSR	(AAG)14	scaffold180	565769	565958	190	CCAGCAGTGACCAACAAGAA	CCTTCAGTCACCTTCAAGCA
Chromosome 1	1Bin23	81.515	BVWI00305	InDel		scaffold180	635164	635278	115	ATACTTGGTGGTAAGGTTTCA	TAACTGACCCTGATGCTAGA
Chromosome 1	1Bin24	82.758	BVWI00308	InDel		scaffold180	1168953	1169094	142	GATTTGGGTTAATCAGAAGGGA	ACCGAAAATGACACTCCAATA
Chromosome 1	1Bin25	83.117	BVWI00310	InDel		scaffold180	1599184	1599323	140	AGCAAAATGACAATTAAACTCGAC	TGTTTGATTTACAGGTCTCATCATT
Chromosome 1	1Bin26	86.271	BVWS02290	SSR	(AG)3	scaffold180	1799664	1799837	174	GTTTAGGGGTCAGTCCAT	CATTTTCAACTTACAAAAGC
Chromosome 1	1Bin26	86.271	BVWS02426	SSR	(TA)9(AT)6	scaffold180	1827220	1827363	144	GAAGAAGGAAGCAGACGGTG	TGGTGGTGGTGGAGGAATTA
Chromosome 1	1Bin26	86.271	BVWI00312	InDel		scaffold180	1875416	1875562	147	TGGTGGTATAGGTGATAAATGTG	TCTTATAAATATTCCAGAGAAGACAAA
Chromosome 1	1Bin26	86.271	BVWS02240	SSR	(GTT)3	scaffold180	2195833	2196096	264	TTCTTCATCCGCATTTCTAT	ATTGCGTTCAAATTCTTCTC
Chromosome 1	1Bin26	86.271	BVWS02246	SSR	(TG)4	scaffold180	2198919	2199184	266	ATTCGGCAAAATTCGATCTC	GTGGTGTCAACGTCACTCTT
Chromosome 1	1Bin26	86.271	BVWS02252	SSR	(TG)9	scaffold180	2503516	2503633	118	GGACCAATGGTACAGTCGAC	TTTGAAGATTCGTGGGTGAT
Chromosome 1	1Bin26	86.271	BVWI00313	InDel		scaffold180	3058824	3058958	135	TTGAACACAGGCAATGAGAC	ACAATCGGGACTGTGAATTATC
Chromosome 1	1Bin27	89.466	BVWI00314	InDel		scaffold180	3348082	3348206	125	GACCGCTGTTGCGTAGAAAT	AAGAACTGCCCGCCAGATAG
Chromosome 1	1Bin28	97.944	BVWI00315	InDel		scaffold180	3937851	3937990	140	CAGAGTCCCAAAAGTAACCGT	ATTATTCAGGTCGGGGCCAA
Chromosome 1	1Bin28	97.944	BVWS02248	SSR	(TTA)4	scaffold490	121063	121362	300	GGATGGATTGAACACGATGGC	TGCGTTGGGGAACTTGCTTG
Chromosome 1	1Bin29	99.547	BVWI00238	InDel		scaffold490	253556	253682	127	CTGAAAAATAAGAGGCACCAC	ACTTGAGATGTCCTTTTCTCG
Chromosome 1	1Bin30	105.48	BVWI00239	InDel		scaffold233	540676	540825	150	TGGATAGTACATCACATGAAGC	CATTTCTGGCAACATAGCTG
Chromosome 1	1Bin30	105.48	BVWS02262	SSR	(AG)3	scaffold233	568300	568514	215	ATGACACGAGCAAAGAAC	CAAACCCATAAGTAACCA
Chromosome 1	1Bin30	105.48	BVWS02485	SSR	(CTT)3	scaffold233	664372	664570	199	CAACAAAGCCCTAACAAAAGC	TGCATCTGGTCTCCTTCTTCT
Chromosome 1	1Bin31	106.713	BVWS02346	SSR	(AG)8	scaffold233	1197120	1197329	210	GTAAGCCTCAAGCAAATGGC	GGAATTTCCACTTCCACGAA
Chromosome 1	1Bin32	110.941	BVWI00240	InDel		scaffold233	1788976	1789124	149	ATTTAAAGATGGCATGTAGCC	ACCATTTACTAACAAGGGCAAT
Chromosome 1	1Bin32	110.941	BVWS02390	SSR	(AAT)10	scaffold233	1991431	1991656	226	TGGGTTCAAGTACTTTGGGG	TCTTCTCCCATTGCCGTTAC
Chromosome 1	1Bin32	110.941	BVWS02364	SSR	(CT)9	scaffold233	2040441	2040634	194	CAACCCCTTCAGTGGAAGAA	TCGAATACCACAACTTGGGA
Chromosome 1	1Bin32	110.941	BVWI00241	InDel		scaffold233	2403259	2403342	84	GTAAGCCACTCTGGATCACG	AGGTGGAGCCGTGTTCATAA
Chromosome 1	1Bin33	115.364	BVWI00342	InDel		scaffold233	2622354	2622446	93	AAACTCTAATGGGACCCAAC	TGAAATGAAAATGACTATTTGAAAAAC
Chromosome 2	2Bin1	0	BVWS02345	SSR	(TTC)7	scaffold148	643233	643442	210	TCAATAAGGTCCCCAACAGC	AAAGACCAAGGGCATTTGTG
Chromosome 2	2Bin1	0	BVWS02386	SSR	(AC)8	scaffold148	709838	709944	107	ATGCTGAGGAGGCTCAAAGA	TGAAGGTGATCAAAATAATGGA
Chromosome 2	2Bin2	7.249	BVWS02388	SSR	(AT)6	scaffold148	354334	354515	182	CGACCTTCCCCCATTCTATT	CATGGAAGTCCACTGCATTAAA
Chromosome 2	2Bin2	7.249	BVWS02285	SSR		scaffold148	1229661	1229894	234	TGTTACCTTAGCCGATTAT	GTCTCGTAGTTGCCTTGA
Chromosome 2	2Bin2	7.249	BVWI00254	InDel		scaffold148	1403619	1403765	147	ACTATTATCTTTTGATCGCTAATCCA	CGATAGATATCCCATATGCAGAGT
Chromosome 2	2Bin2	7.249	BVWS02330	SSR	(TG)6	scaffold148	1808727	1809006	280	TGCCCATTACAAATGCGTAC	TTCCTCCCTCAATTAAATAC
Chromosome 2	2Bin2	7.249	BVWS01108	SSR	(AT)19	scaffold148	1891024	1891458	435	CTTGCCCACTCTACCCTCAG	GTTCTGCTCCCACTTTGCTC
Chromosome 2	2Bin2	7.249	BVWS01826	SSR	(AT)6	scaffold148	1938658	1938890	233	TGCAAAACCCAAAAGGAAAG	CCAAAAGGATGACCCAAAAA
Chromosome 2	2Bin3	13.876	BVWS00222	SSR	(TG)10	scaffold95	1620040	1620158	119	TTTGATCGACAATGCATGGAATAC	TGTTGGTCGTTGGGTTTTTAATTT
Chromosome 2	2Bin4	18.278	BVWS00653	SSR	(ATT)12	scaffold95	2439083	2439355	273	ATCCCCCGAAGCTTTGTTAT	TCCTTCAAAATTAAATGTTACCAAAA
Chromosome 2	2Bin4	18.278	BVWS02344	SSR	(CTG)5	scaffold95	2599049	2599223	175	AAACTGGGGAGAAAATGGCT	AAATTCTGGCTTCTTGGCAT
Chromosome 2	2Bin4	18.278	BVWS00654	SSR	(TA)6	scaffold95	2694099	2694353	255	TGGGAGAAAAGAATTTTTGGAA	CCCTCAAGTGTCATCTTTCACA
Chromosome 2	2Bin4	18.278	BVWS00007	SSR	(AG)18	scaffold95	2856348	2856499	152	GCTATGTTGGTTTTTGGCTACACC	CCATTTCCCTTTGTTCCTATGCTA
Chromosome 2	2Bin5	23.082	BVWS02362	SSR	(TCA)5	scaffold95	4397649	4397872	224	GGAGAAATGGGGAAGAAAGC	AACTCCTTTGTTGGGCAATG
Chromosome 2	2Bin6	29.084	BVWS01426	SSR	(TTA)5	scaffold347	129301	129575	275	CATTTCTGCCCATCAACACA	CCGACACAAAATCAACCACA
Chromosome 2	2Bin6	29.084	BVWI00212	InDel		scaffold347	180852	180996	145	ATATAGTGGGGCTAAGCTTACAG	TGAGGCAATTGGGCCATCTA
Chromosome 2	2Bin6	29.084	BVWS01156	SSR	(TA)7	scaffold541	395636	395848	213	GGTTGCAATCAACTCTTTTCG	TGGAGAAGATTCTTGGACGTG
Chromosome 2	2Bin7	29.887	BVWS00344	SSR	(CTTTT)4	scaffold110	855010	855162	153	GCATGCCTTTTCTTCAAAATGACT	TGGGTCTATTTGGTATTTAATTGTGTGT
Chromosome 2	2Bin7	29.887	BVWS02217	SSR	(ATA)3	scaffold110	969458	969698	241	TCAATGGCTGAAGGAGTC	TTGCCCTGATGGTGTAAT
Chromosome 2	2Bin7	29.887	BVWS01634	SSR	(TA)7(TG)9(TA)8	scaffold110	1331818	1332183	366	TTGTTTGATTTGGCAAGCAG	TGAGGGAGATTTGAGAATTTGG
Chromosome 2	2Bin7	29.887	BVWS00864	SSR	(AGA)6	scaffold110	1420922	1421036	115	GGAGAAGAAGAGGAAAAGAAGAAGA	CAAGTTAGCCGACGTGTGAA
Chromosome 2	2Bin7	29.887	BVWS00863	SSR	(AT)9	scaffold110	1627850	1628102	253	GCGAGATCAACCACCAAGAT	CACTGGAGAGAGCGTGTTGA
Chromosome 2	2Bin8	33.888	BVWS00547	SSR	(TATT)8	scaffold34	91554	91755	202	TGGTGTTGAAAATGAAGTCCC	TCATTAGGAGGCAGTGCAAA
Chromosome 2	2Bin8	33.888	BVWS00003	SSR	(TTA)8	scaffold34	523283	523441	159	ATGGGAAAGTTGTTCAAAACCACA	TTGCACTTGACTGTTGGTGAGAAT
Chromosome 2	2Bin8	33.888	BVWS01324	SSR	(AG)11	scaffold34	891973	892133	161	CCACCACTTTGGCTTCCTTA	ACTTTCCCTAAAAGCGGGAA
Chromosome 2	2Bin8	33.888	BVWS01281	SSR	(TTTA)5	scaffold34	1295740	1295849	110	TGGGAAAACCTTGATGTGAA	CGGTATTTAGCATTTCCAGG
Chromosome 2	2Bin8	33.888	BVWS01568	SSR	(AAT)5	scaffold34	1492759	1492960	202	GCTAGAATTTTCGTTTTTCCGA	GGAGCTCAAGATTGGATTGG
Chromosome 2	2Bin8	33.888	BVWS00638	SSR	(CT)11	scaffold34	1638653	1638875	223	GCTCAACCCCTAGCCTCTCT	GTGGTTGGGCGAAGAACTAA
Chromosome 2	2Bin8	33.888	BVWS00949	SSR	(TA)11	scaffold70	25255	25472	218	TTGGGAGATTTGGAATTGGA	GGGCACTAAGCTTGGCTACA
Chromosome 2	2Bin8	33.888	BVWS01303	SSR	(TTA)6	scaffold70	455741	455877	137	TCTCCTCTTGTCCAGCATCC	TTATGGGCATAACTGCGTGA
Chromosome 2	2Bin8	33.888	BVWS01417	SSR	(TA)13	scaffold70	853408	853547	140	CGCTCCACCCCAATAATGTA	TGAAATGTGCATTTGAATGTGA
Chromosome 2	2Bin8	33.888	BVWS01379	SSR	(AGA)6	scaffold112	49839	49971	133	AGCTCCAAGACCCACATCAC	TGTGGGATAAATCAACCAGGA
Chromosome 2	2Bin9	34.356	BVWS02155	SSR	(CAA)5	scaffold112	150963	151282	320	CCCCCACTCTCAATTCTCAA	GGTCGCTGTTCCTTGTTCAT
Chromosome 2	2Bin9	34.356	BVWS02156	SSR	(CAA)5	scaffold112	150987	151262	276	CAACGCTCTCCATCTTTCAA	CTATCAGGTCCCTCCCGAAT
Chromosome 2	2Bin9	34.356	BVWS01035	SSR	(AAT)5	scaffold211	67761	67980	220	GGCCTAGAACCAAAACGGAT	GGGCAAAGCTTAGGGGTAAT
Chromosome 2	2Bin9	34.356	BVWS00627	SSR	(AAAG)5	scaffold211	308467	308744	278	GGGTCGAACCAAAGTGAAGA	GTTGTAGGTTTGCGTCGGTT
Chromosome 2	2Bin9	34.356	BVWI00086	InDel		scaffold229	174173	174252	80	CTTGTACGCGGGTACCCTAT	GTGCGTTCCGGTTCTACTTC
Chromosome 2	2Bin9	34.356	BVWI00042	InDel		scaffold229	344795	344896	102	TGCTTTGGAGAAGTATTGTCAC	TGATAAAGTTTAGGTCAACAAATACA
Chromosome 2	2Bin9	34.356	BVWS01514	SSR	(TA)6	scaffold229	529259	529435	177	CTCAGACTAGGGTCGGGAGA	CAGGGACAGGGGTCAAACTA
Chromosome 2	2Bin9	34.356	BVWI00043	InDel		scaffold229	588666	588814	149	TCCCAAACTCGGTACATAAG	AATATTGTTGTGGACTTATCACAT
Chromosome 2	2Bin9	34.356	BVWS01617	SSR	(AGAA)7	scaffold444	124520	124741	222	TTGAGATTGCCAACCAAACA	CAAAGCTTGAATGAACATCACA
Chromosome 2	2Bin9	34.356	BVWS01911	SSR	(TCT)9	scaffold1052	95907	96173	267	CCTTCTCTGCTGCAGGTTCT	AAGAAGAAACCACCGATCCC
Chromosome 2	2Bin9	34.356	BVWS01912	SSR	(TC)9	scaffold1052	102625	102802	178	AGCCCTCAACAGCAATGAGT	CAAGTTGGCGATGGCTTTAT
Chromosome 2	2Bin10	35.863	BVWI00114	InDel		scaffold90	307124	307263	140	AAACATGAAAGATACAAAGTGTGA	TCCCACCACAATTGAGAACA
Chromosome 2	2Bin10	35.863	BVWV00002	SV		scaffold90	596402	597121	720	GAAACAATGCAGGGGAGACT	ACATAATTATTACTAATGGGGCCTAC
Chromosome 2	2Bin10	35.863	BVWS00751	SSR	(AT)7	scaffold602	305084	305224	141	CTCCTTTTTATGCGGACCAA	TTTTTGAGCATTTGAGGAATGA
Chromosome 2	2Bin10	35.863	BVWI00175	InDel		scaffold602	552168	552299	132	CCATCTCATTTAGCCCTTGC	AAAGATGGTACTAAGGATTGCTC
Chromosome 2	2Bin11	40.452	BVWS00085	SSR	(TC)12	scaffold188	104071	104209	139	CAGGTGGGGATTTGTATTGTCATC	TGGGTGTGAAGGTCAGTTGAGTTA
Chromosome 2	2Bin11	40.452	BVWI00128	InDel		scaffold188	178438	178568	131	GCATTTGAGCGGAATTAGAAC	TTTCACTTCGACGTAGCATC
Chromosome 2	2Bin11	40.452	BVWS00681	SSR	(AAT)9	scaffold134	108781	109002	222	TCTTGTCGTGCAATCTCTGC	TTCAAGAAGAAAATTGGTCACCT
Chromosome 2	2Bin11	40.452	BVWS02180	SSR	(GAA)5	scaffold134	1268796	1269056	261	GACATGGTGCTGTGCAAGAT	TCCATCTGCCACCTTTGAAT
Chromosome 2	2Bin11	40.452	BVWS00506	SSR	(TA)6	scaffold134	1281530	1281712	183	CCTCGGGGAAGTGATGTCTA	AGTCGGCCCCTACACCTAAT
Chromosome 2	2Bin12	41.106	BVWS01553	SSR	(TATT)5	scaffold134	1449950	1450181	232	TTTGATACCAGCATTGGTCC	TTTGAAAATAGTCAAAAGATAGGCA
Chromosome 2	2Bin12	41.106	BVWS00183	SSR	(TCT)7	scaffold134	1631909	1632034	126	TCACTCTTCAATGGGAGTGTACCA	ATCGTCTGAAACGAAAACCAAAAA
Chromosome 2	2Bin12	41.106	BVWS00565	SSR	(GAT)5	scaffold58	98633	98824	192	CTGTGATCTGGCCCATTTTT	AAAGGAAACCATTTCGGCTT
Chromosome 2	2Bin12	41.106	BVWS00566	SSR	(GAC)7	scaffold58	169624	169851	228	CTCGGGTCACTTTCAACCAT	TGTGGGTTGAGTTTTCTTTGC
Chromosome 2	2Bin12	41.106	BVWI00165	InDel		scaffold462	111203	111331	129	TGAAAACAATGATGGAGAAATTCG	GCAATGGAAACTAAAACTAACAGA
Chromosome 2	2Bin12	41.106	BVWS01451	SSR	(AAAAAT)5	scaffold462	116396	116669	274	AAAAACTTCCAACCAAATGACC	GGATTGCACGTGAGAGACAA
Chromosome 2	2Bin13	42.879	BVWI00166	InDel		scaffold462	329757	329867	111	AGTGTGGCTAGTGGTCCAAG	ATGTGCAATTGGAGTTTGGTTTA
Chromosome 2	2Bin14	49.246	BVWS02315	SSR	(TA)5	scaffold94	6417367	6417507	141	ATGGCAGCTCAGCTCATTAA	GATATTTCCACCAGGGAGTG
Chromosome 2	2Bin14	49.246	BVWS01767	SSR	(TA)9	scaffold94	5969952	5970147	196	GGAAATTTTGGGGCAATTTT	TTGCATCCCAAGACATATTCA
Chromosome 2	2Bin14	49.246	BVWS02056	SSR	(TC)6	scaffold94	5481344	5481488	145	AGCATCATCAGGATTCCCAC	TGATTCAATGGAAATGGCAA
Chromosome 2	2Bin14	49.246	BVWS01096	SSR	(TC)16	scaffold94	5350826	5351119	294	ATTCGCCATGCCTACAGTCT	TTTCTACCGAAAATGTGCCC
Chromosome 2	2Bin14	49.246	BVWS00328	SSR	(TGGGT)5	scaffold94	5156954	5157111	158	CATGAATGAACCCAACCCTTAAAA	AAACCCTCTAAGGGTGCTCAAAAA
Chromosome 2	2Bin14	49.246	BVWS01393	SSR	(AT)9	scaffold94	4601505	4601704	200	AGAAAGTTGCTTGATGACTCCA	TGGAGAAATTAGGCAGCAAAA
Chromosome 2	2Bin15	54.565	BVWS00314	SSR	(TA)9	scaffold94	4143555	4143691	137	GAGGAGAATCGGTTCTTGGACATA	TTGAGCATCCTTGGGACTATCATT
Chromosome 2	2Bin16	54.951	BVWS01602	SSR	(AAT)9	scaffold94	3713192	3713419	228	CTCCTTGTTTCCATCCAAAA	TCACACATCATCCATTTTCCA
Chromosome 2	2Bin17	57.855	BVWS00221	SSR	(AT)13	scaffold94	3406682	3406801	120	CCCTACCTTCGCATCTAGAACCTT	CATGGGGAGTGACCGATAAATAAG
Chromosome 2	2Bin18	58.906	BVWS02013	SSR	(TCT)15	scaffold94	3177096	3177350	255	AGCGCGCCAAATACAAAAAT	CCTGTGTTAGGGCTCTGCTC
Chromosome 2	2Bin18	58.906	BVWS00009	SSR	(TC)25	scaffold94	2699929	2700114	186	CCAGGATTCCATTAACAAAACTGT	TGATTCTATGAATGAGACCCATGA
Chromosome 2	2Bin18	58.906	BVWS00010	SSR	(TA)11	scaffold94	2692523	2692659	137	TGCTTATATCATCTTCTTAAAAGCGGT	CAAAAGGGAAGTCCACTATTTTGTTC
Chromosome 2	2Bin18	58.906	BVWS02379	SSR	(GA)11	scaffold94	2442179	2442337	159	GCAAATGAAAGTGAAGGTGG	CTCGACGAATTATCGCGAAC
Chromosome 2	2Bin19	64.594	BVWS02283	SSR	(TTC)6	scaffold94	1429295	1429517	223	CAAAGCACCGATCATACT	TCAGATGTGGGTGAAGTG
Chromosome 2	2Bin19	64.594	BVWS02325	SSR	(AT)6	scaffold94	999510	999713	204	TACCGCTTAGCAACTGGACG	CTGGGATTCTGAACTAGAAATA
Chromosome 2	2Bin19	64.594	BVWS02437	SSR	(CT)20	scaffold94	555599	555839	241	GAGCAGGGGAGAAGGAAAAC	CCAGTAGCTTTTTCCGATGC
Chromosome 2	2Bin19	64.594	BVWS02441	SSR	(TAA)11	scaffold94	498157	498388	232	GCAAAATGCAACTGTTTATCG	CCATTATGATTTCAATCAATCTCC
Chromosome 2	2Bin20	68.85	BVWS01965	SSR	(AT)6	scaffold94	118524	118689	166	AGAAGCTGAGCTGGTTTTGG	TTGCACATAAATCCACTCTATGC
Chromosome 2	2Bin20	68.85	BVWS02287	SSR	(AGT)3	scaffold106	3033801	3034189	389	CACAGCAGTAACGGGTGC	TTGCTTATGGGACAGACA
Chromosome 2	2Bin20	68.85	BVWS00058	SSR	(ACGAAA)5	scaffold106	2885090	2885248	159	GAAACACTTCACACAGCTGGTTTC	TGCATTTTCATCATCAGTTCAAAGA
Chromosome 2	2Bin20	68.85	BVWS00114	SSR	(AG)27	scaffold106	2793236	2793410	175	TTCCTATCAATGAGGGTGTTGAAGT	TGCCAACGGTAACATTTTAGATCA
Chromosome 2	2Bin20	68.85	BVWS02421	SSR	(AAT)9aacaatgaaaaaagggcag(CTTT)5	scaffold106	2295380	2295612	233	GGAGGGCAATACGATGAGAA	ATCCTGGGTCATTGCAGATT
Chromosome 2	2Bin20	68.85	BVWS02340	SSR	(GGC)5	scaffold106	2181498	2181722	225	AAAAGCGGAGAAAACAGGGT	CTAAAGATCCGTTCCACCGA
Chromosome 2	2Bin20	68.85	BVWS02360	SSR	(TA)7	scaffold106	1213449	1213565	117	GCTTTTTCAGGCAGGTGAAG	TTGAAACATTGGTTCTCTGTGC
Chromosome 2	2Bin20	68.85	BVWS02395	SSR	(TA)6	scaffold106	808989	809159	171	GCATCTGTTTGGTGATCCCT	CAGCCTCCATTACAAGACGA
Chromosome 2	2Bin21	76.087	BVWS00201	SSR	(AAT)8	scaffold106	597779	597908	130	ATTTCCCACACCCTAAACTTGGAT	TAGGTACACGATGACACCCATCAC
Chromosome 2	2Bin21	76.087	BVWS00029	SSR	(TG)13	scaffold106	98121	98214	94	TGTCAAACACAAAGAGATGCAAGA	CCTCAAATAAGCTCTCTGGTGAGTG
Chromosome 2	2Bin21	76.087	BVWS00028	SSR	(CT)11	scaffold3425	9744	9831	88	AGCAGGATGGATGAAGTTGAAGAC	GCTTTACCCCATCCTTAACAAACC
Chromosome 2	2Bin22	84.367	BVWS02398	SSR	(TAA)8	scaffold573	2005340	2005479	140	ATGGAATGCTTTGGGACTTG	TCCACAGTTCATTGAAGACACA
Chromosome 2	2Bin22	84.367	BVWI00252	InDel		scaffold573	1651409	1651488	80	AATATTAGATAATGTGAGGTGGTTC	TAATAAATTCGGTCTGTTTTAACG
Chromosome 2	2Bin22	84.367	BVWS02279	SSR	(AT)4tatttattatatgta(TATG)3	scaffold573	1489229	1489605	377	ACATAACCGTAGATCCAAAT	AGAAGTCCAGGAGTTCACAT
Chromosome 2	2Bin22	84.367	BVWS02249	SSR	(TGG)3	scaffold573	1401734	1402071	338	CCGAAGTGAAAGGAAAGGAT	AGTCAAAGAGGCTGAAACCC
Chromosome 2	2Bin22	84.367	BVWS02258	SSR	(GA)12ggggcaaaatggtctttctaattc(CTT)5	scaffold573	1241595	1241831	237	AATTGGTCCAAAGCAAAC	TTGACTTCAAGCGAATGG
Chromosome 2	2Bin23	86.782	BVWS02404	SSR	(GTT)5catcaaattttctgtcttggaatattgtggatcattattactattattattgttgttattgctt(TGA)7	scaffold573	1049319	1049592	274	CGTCTATGGAAGCCAATGGT	ACGGTCGTACGAGGTTGAAG
Chromosome 2	2Bin24	90.125	BVWS02343	SSR	(TA)7	scaffold573	645359	645562	204	GAGCTGAACAAAAGCATCCC	GATTCACAGAAGCCTTTGCC
Chromosome 2	2Bin24	90.125	BVWI00251	InDel		scaffold573	245726	245871	146	TCAGAACACTAGGTACTACAATGGAA	GTACTCCAGCCGGCTCTTTC
Chromosome 2	2Bin25	90.646	BVWS00083	SSR	(AT)11	scaffold1630	639508	639665	158	GTAGCATGAAAATAACTGCCGCAC	TTAGAGAGCATGAGCCAAGGAAAG
Chromosome 2	2Bin25	90.646	BVWS00285	SSR	(TA)11	scaffold1630	636329	636485	157	GGCCTCTTATGCATTATTGACCAC	TGTAAAGCAAACCCTCCATCTCTC
Chromosome 2	2Bin25	90.646	BVWI00233	InDel		scaffold1630	601760	601851	92	GAAATTGGAGGGTGAGGGAA	CACTCGTTCGGCTACTCTAT
Chromosome 2	2Bin25	90.646	BVWI00232	InDel		scaffold1630	332805	332948	144	AACACAGCCTGTCACCACAA	GTGGTACGCATGGAACCTGA
Chromosome 2	2Bin26	94.809	BVWS02281	SSR	(TTTCTT)3	scaffold1630	585120	585275	156	TGAGAAGCCGACCAGAAA	GGATGCCGTCGTTGAATA
Chromosome 2	2Bin26	94.809	BVWS02439	SSR	(GA)28	scaffold1630	406111	406327	217	TTCCTGTTTCATGATTCTCCAC	TCAGAATGGAGCCATTAACTTG
Chromosome 2	2Bin26	94.809	BVWS02450	SSR	(GA)13	scaffold1630	375141	375373	233	CACAATCAAGGAAGGTTCAGC	TGAGCAAGCCAACAGAAGTG
Chromosome 2	2Bin26	94.809	BVWS02459	SSR	(TAAA)3	scaffold1630	369756	370004	249	TTGCCATTGAAATTTTGAGAAG	TCAAATTTTGTTTCTTGGAAATG
Chromosome 2	2Bin26	94.809	BVWS02448	SSR	(AAT)8(AATAA)5	scaffold1630	348455	348623	169	GGGAAATTAGCCCTTTTGTTG	AATGGATGGGATCGTGCTAC
Chromosome 2	2Bin26	94.809	BVWS02434	SSR	(GAA)9	scaffold1630	346707	346955	249	GGTTATGGCCATCTCTCTGC	GAGAGTGGGCGTAAGGTGAG
Chromosome 2	2Bin26	94.809	BVWS00297	SSR	(TC)20	scaffold1630	172584	172722	139	ACAACTTTGATTGATTGCACGATG	AAGTGAAAGACCCTTTTCCCAAAC
Chromosome 2	2Bin26	94.809	BVWS00338	SSR	(TC)13	scaffold1630	170558	170717	160	ATTCAAAACCCCACTCATTGCTAA	TTAAAGCAGCGGTAAAGGAAACAA
Chromosome 3	3Bin1	0	BVWI00189	InDel		scaffold869	117352	117491	140	CAATACTTTCTTCATCCGACTG	TTTTCTCATCAATCCAGGTAGA
Chromosome 3	3Bin1	0	BVWI00190	InDel		scaffold869	139455	139598	144	TTGGTGGGAAATTTTTAAAGTGG	AAACGAGAGAAAGCAGTTCG
Chromosome 3	3Bin2	2.409	BVWS02427	SSR	(CA)8	scaffold869	1103034	1103275	242	GTGCACTCTTCCACCCATTT	ATGGAATGAATCCCAGTGCT
Chromosome 3	3Bin2	2.409	BVWS02318	SSR	(AT)7	scaffold869	2089192	2089379	188	GCTACCTCTTTGGGTTTCAT	CTAGGGGATTTGGATCATTG
Chromosome 3	3Bin3	5.722	BVWS02378	SSR	(TC)10	scaffold808	48080	48357	278	CATTTTGAAAGCTTAGGGACTTG	CGTTTCAGAACCGTCTGATG
Chromosome 3	3Bin4	9.309	BVWS00131	SSR	(GA)9c(AG)14	scaffold808	1170834	1170986	153	GGGATCTGATCAGGTATCTGCAAG	TGTTTTTGTTTTGTTACCTCACTCACA
Chromosome 3	3Bin4	9.309	BVWS00244	SSR	(TC)10	scaffold808	1199160	1199306	147	GCTACAAGAAAGCAGTTTGGATTTTC	GCATGGATTGTATCAAACAAATGCT
Chromosome 3	3Bin5	11.328	BVWI00209	InDel		scaffold284	345337	345442	106	TCAATTCATGACCTGTAACTTGT	CGATCTTTCCAAGGCAAACC
Chromosome 3	3Bin5	11.328	BVWI00210	InDel		scaffold284	363947	364096	150	CCTGAAATTTCCGTACTTGGTT	ATCATCCTCTGGGACAGCAA
Chromosome 3	3Bin6	13.485	BVWS00958	SSR	(TTA)5	scaffold284	763495	763765	271	TGGAAAACTTGAAAGTGGGG	ACGTAAAGTACTGGCGGTCG
Chromosome 3	3Bin6	13.485	BVWI00249	InDel		scaffold3	233508	233645	138	TAGCCCTACACACTATGCCT	GCAAAGAATAGGCAATTACACG
Chromosome 3	3Bin6	13.485	BVWS00276	SSR	(TTA)8	scaffold3	280745	280883	139	CACCCTTAAACCTTCCCTCCTCTA	TCGTTTCTTTTTCAGGAGAAGACC
Chromosome 3	3Bin6	13.485	BVWI00250	InDel		scaffold3	289924	290062	139	AGGTATAGTATGTCCGTTCTTGG	ATGGGAGGGGGTAACGATTT
Chromosome 3	3Bin7	19.579	BVWS02334	SSR	(TGC)7	scaffold3	547034	547158	125	AGTGGCTATGGTGGCTATGG	GATTCAGAGTAGGGAGGGGC
Chromosome 3	3Bin7	19.579	BVWS02275	SSR	(TG)3	scaffold3	1234471	1234771	301	TCCTGAATCCAGAGGCAACA	TGGCACCGACGACGCACAT
Chromosome 3	3Bin8	22.726	BVWS02203	SSR	(AT)9	scaffold3	3481947	3482226	280	TTGGATTGAGCTACTACTCGCA	ACCAGGCTAAAGAAAAGGGG
Chromosome 3	3Bin9	24.113	BVWS02368	SSR	(AAG)6	scaffold3	1595091	1595273	183	ACCTCTTTCCCCATCAGTTG	CAATGGTGGTGTTGAAAGAAAA
Chromosome 3	3Bin9	24.113	BVWS01296	SSR	(TA)8	scaffold3	2132843	2133067	225	AAGGTGGTGCTTGGAATGAA	TGCCTCAAGTGTGACACCAT
Chromosome 3	3Bin9	24.113	BVWS00873	SSR	(AAT)8	scaffold3	2412168	2412447	280	TTGGAGAAGGAAAAACTTTTGG	CGTATTAGCATATCTGGTGATTGAA
Chromosome 3	3Bin9	24.113	BVWS00874	SSR	(TTG)5	scaffold3	2554651	2554871	221	CACAAAGTTCTTAAGTTTGGGGTT	CCAAAATAACCAAATTAAATTGACC
Chromosome 3	3Bin9	24.113	BVWS01335	SSR	(AAT)6	scaffold3	3056521	3056629	109	AACGTCAGCACATGCACATT	GGCTTCATTGGCCTACTCCT
Chromosome 3	3Bin9	24.113	BVWS00337	SSR	(AT)11	scaffold3	3354426	3354578	153	TCCCTAAAGCTTAGAGGTGTAAATTG	GTTGCACAAAGATGATGTAATTCG
Chromosome 3	3Bin9	24.113	BVWS00226	SSR	(AG)13	scaffold3	3422229	3422388	160	GACTCAACTTCAGAAAGATCCAGACC	CCTTCGTGATGTTCCTTTCTTTTG
Chromosome 3	3Bin9	24.113	BVWS02204	SSR	(ATT)5	scaffold3	3552017	3552205	189	TCTGGGTTTATCTGGGTCTATCA	TTGGAGAAATCCGCTTTCAA
Chromosome 3	3Bin9	24.113	BVWS00038	SSR	(GA)10	scaffold3	4786270	4786380	111	GTCACTGTCAAGAAAAGAAGGGGA	GATGCCAACATTTGGATGTGAATA
Chromosome 3	3Bin9	24.113	BVWS01383	SSR	(AG)6	scaffold3	5067647	5067757	111	GCCCTTAATTGCCTCTTGCT	AACTTTTATGCGCTGCCAAC
Chromosome 3	3Bin10	27.782	BVWS01728	SSR	(TCC)7	scaffold3	5594811	5594937	127	CGCTGCTACGTCCTCTTACC	TGCCCAAGAATAATGACGAA
Chromosome 3	3Bin11	29.216	BVWS00485	SSR	(TAAA)6	scaffold36	8603	8840	238	AAGTGGGAGATAGTTGGGGG	TGGGACAATTAAATAGGGATGC
Chromosome 3	3Bin11	29.216	BVWS01685	SSR	(ATT)7	scaffold378	223886	224116	231	CACTTTGATTGCGACCTTTG	CTCCGAAGTTGGACATGTTATG
Chromosome 3	3Bin11	29.216	BVWS01151	SSR	(AAT)6	scaffold378	578694	578915	222	TCCTCTCCTTTCAAATGTCCA	CGGTCTATTTTCGATAGACGGT
Chromosome 3	3Bin11	29.216	BVWS01199	SSR	(AAT)5	scaffold567	125120	125319	200	ATTGGCAACACCTCCAACTC	AAAAGATGTCTCCTTCTCCCAA
Chromosome 3	3Bin12	31.356	BVWS01454	SSR	(AATA)5	scaffold243	90913	91188	276	GCAGGTTGTCCCATTTGATT	ATGAGGCAAATTGGTGGAGA
Chromosome 3	3Bin12	31.356	BVWS01092	SSR	(CT)7	scaffold243	727132	727375	244	TCTGAGGCCCTCTCATTGTT	ATGAGGGGATGAAGTCGTGT
Chromosome 3	3Bin12	31.356	BVWS00999	SSR	(TCT)6	scaffold96	44904	45182	279	TCCTTCAAGTGCTTATGGGG	AGAGGGAGGCTAGGGAACAA
Chromosome 3	3Bin12	31.356	BVWS00998	SSR	(ATT)9	scaffold96	83713	83896	184	CCTTAAATCTGAGACAGCAGTGAA	TTTTCATGGGTTGATGCAAT
Chromosome 3	3Bin12	31.356	BVWI00017	InDel		scaffold96	402826	402968	143	GCATATTTTCGGCATTCTTCG	GTGTTACAACTTTTAAATACCTCGT
Chromosome 3	3Bin12	31.356	BVWI00018	InDel		scaffold96	483696	483845	150	TTGCCACCCACGATATTATT	GACATAAAGTATTGAGTTGTTCTTAAT
Chromosome 3	3Bin12	31.356	BVWI00019	InDel		scaffold96	753909	754034	126	GAAACCATGCTAAAGAAATGGAC	CAATAATCTTTCCACTGCTTACAAA
Chromosome 3	3Bin12	31.356	BVWS00724	SSR	(TA)11	scaffold809	105638	106111	474	CGAAGCAAATGGGTGTCTTT	CACTCCAGAAGGGGAAACAA
Chromosome 3	3Bin12	31.356	BVWS01047	SSR	(TTTCT)5	scaffold856	209809	210026	218	GCCTCCCTAAGGACTTGACC	TCCAGAGGAACGGGTCATAC
Chromosome 3	3Bin12	31.356	BVWS01076	SSR	(AAT)6	scaffold8060	556	698	143	TCATTTTTGGTAAATGTCATGGA	CCGCATTTTCGTTGCTAACT
Chromosome 3	3Bin12	31.356	BVWV00016	SV		scaffold144	205861	206620	760	CAGCTAAACTATGTTCATATAACTGAC	TCTTGCCCTACGCATTCAAA
Chromosome 3	3Bin12	31.356	BVWS01623	SSR	(TTA)7	scaffold144	487405	487619	215	CGTCTGCACGCCTATACTGA	TGATGATGAAGAACGGAACG
Chromosome 3	3Bin12	31.356	BVWS00765	SSR	(TTTA)6	scaffold144	703677	703922	246	CCCAAATTGTGGAGTGAGGT	GCGCACTGATCCACATTACA
Chromosome 3	3Bin12	31.356	BVWS00700	SSR	(TTA)6	scaffold144	1772995	1773224	230	GTGTTTGATGTGCAGGGTTG	TTTGGTTTCCAAAGTTGTTTCA
Chromosome 3	3Bin13	32.275	BVWS01276	SSR	(ATT)5	scaffold144	1396263	1396507	245	TGGATGATTTGCATATCCCTT	TGTTTGCTTGGAATAAAGTTCG
Chromosome 3	3Bin14	32.595	BVWS00453	SSR	(AT)9	scaffold144	1803332	1803522	191	TTCAAACTTTGCCACAAGGG	CCACCTGGGAACTAACCTGA
Chromosome 3	3Bin14	32.595	BVWS00454	SSR	(TA)13	scaffold144	1913470	1913626	157	ATCAGTCACGTCAAGACCCC	GGTACACCCCTCCATGAAAA
Chromosome 3	3Bin14	32.595	BVWI00222	InDel		scaffold144	1732596	1732701	106	CGTAAATGGTCAACTTACTGTTGG	GACTATGGGGTCCCTCCACT
Chromosome 3	3Bin15	33.512	BVWI00119	InDel		scaffold144	2190220	2190356	137	ATTATGCGATTGCACCTTTT	ATAAGTTATTTAAGGGGTTTTAACATT
Chromosome 3	3Bin15	33.512	BVWS01458	SSR	(CAT)6	scaffold144	2211460	2211738	279	ATGCATTATGGGTTTGGAGC	GGCTTCATTTCAGAGGTTCAA
Chromosome 3	3Bin15	33.512	BVWI00120	InDel		scaffold144	2226951	2227065	115	CACATGTGTTGCGTCCTATG	AGGAGCATTCGAGGTCAATTA
Chromosome 3	3Bin15	33.512	BVWI00053	InDel		scaffold247	559173	559314	142	TTTCTAATTAAGGACATGACCAG	TTACTGGCTACCCTTTTGAT
Chromosome 3	3Bin15	33.512	BVWI00054	InDel		scaffold247	553634	553733	100	GCATATTGTTTTTGGATTGTTATTCCT	AGGGTGATTCAAGCAAGACG
Chromosome 3	3Bin16	35.56	BVWS00676	SSR	(AT)13	scaffold247	1377	2842	1466	GCAATTGTGGCAAATAGGCT	CCTGCATACACAAACCTTGAAA
Chromosome 3	3Bin16	35.56	BVWI00143	InDel		scaffold247	159	308	150	TGTGTTCTTGGCCTTCTAGT	ATCAAACGCTCCAATCCTAC
Chromosome 3	3Bin16	35.56	BVWS00911	SSR	(AAT)8	scaffold40	584675	584865	191	GCGTTACCCAAATTTTCAGG	AAGAAGGAACACGTGGGTTG
Chromosome 3	3Bin16	35.56	BVWS01212	SSR	(AAT)5	scaffold120	82618	82891	274	TTTTGGTTAGCTCTTCACATTCC	CCTCCATGACAACCTCCATT
Chromosome 3	3Bin16	35.56	BVWS01982	SSR	(TTCTCC)6	scaffold120	317147	317426	280	GATGAAGCAGTCATCGCAAA	CCGTCGCTACTGCTCTGTAA
Chromosome 3	3Bin16	35.56	BVWS01691	SSR	(AT)7	scaffold120	932413	932681	269	TGACATTTCACGTTCAATATGTAAGA	GGCGAAGAAAAGACGAAAAA
Chromosome 3	3Bin16	35.56	BVWS01932	SSR	(CT)7	scaffold120	1552263	1552430	168	GGTGAGTTCCTTTGGCAAGA	AACCAAAATTTGTGCAAGGG
Chromosome 3	3Bin16	35.56	BVWS02321	SSR	(GA)7	scaffold120	1552345	1552456	112	AAAGGGCTTTATCAGTAGGC	ACAAATACTCTGGGCAGCAA
Chromosome 3	3Bin16	35.56	BVWS00805	SSR	(TTAA)5	scaffold156	254361	254612	252	TTGTGACAATCTCGCCTTTG	AAAAATGTGCCACGTCATCA
Chromosome 3	3Bin16	35.56	BVWS00643	SSR	(AT)12	scaffold290	129509	129632	124	TTAGCACAACACTGCAACACC	CCTGAGCAATTTGATGGTTATG
Chromosome 3	3Bin16	35.56	BVWI00046	InDel		scaffold290	239095	239239	145	TTGTAGTGTTTCGGGGGTAG	TAGCTCAGAAAGGCGTAGAC
Chromosome 3	3Bin16	35.56	BVWS01091	SSR	(TA)6	scaffold722	100915	101135	221	TTGGCAACGTTCATAATGTCA	CTAAGGCACTTCCAACGCAT
Chromosome 3	3Bin16	35.56	BVWS00575	SSR	(TTAA)5	scaffold753	26497	26767	271	CCCAAGTGGCAGTTTGAATAA	CACGGGAACTTCTTCTCCTC
Chromosome 3	3Bin16	35.56	BVWS02305	SSR	(TTA)5	scaffold1309	127356	127511	156	TCTTGGCGTTGGAAATGAAT	ATCTTTTAAGCCTGGGGAGA
Chromosome 3	3Bin16	35.56	BVWI00188	InDel		scaffold1309	273971	274119	149	GAGGTCCGGGTTCAATAGTA	TGATAGAAATGTTGACATGAAGATG
Chromosome 3	3Bin17	38.516	BVWI00138	InDel		scaffold209	930079	930225	147	AAACTTGCGACACAATAAACT	TTTAGTATCCCAGCAGTTCAA
Chromosome 3	3Bin18	39.054	BVWS02306	SSR	(AT)9	scaffold209	539479	539642	164	AGGTTGCTGTCCAGAAGGTC	TTCGCCAAATACAAAAGTAC
Chromosome 3	3Bin18	39.054	BVWI00137	InDel		scaffold209	486172	486272	101	ACTTGCATAAATCTAGTTTGGTC	CAGTTCAAACATGCGACAAT
Chromosome 3	3Bin18	39.054	BVWS01413	SSR	(TA)6	scaffold209	318463	318609	147	GCGGAGTAGCCGAATTGTAA	ATCTCTTCCTGTCGGGGAAT
Chromosome 3	3Bin19	44.774	BVWI00156	InDel		scaffold317	636294	636381	88	AATTATGGCAAGGGATTTTCC	ATTAATTGGACGATGATGTGG
Chromosome 3	3Bin20	48.291	BVWS02202	SSR		scaffold317	131778	132038	261	AATGAATTAAATTTCTTCGAAAATG	TGTTGATAAATTATGGACCTTTTG
Chromosome 3	3Bin20	48.291	BVWI00155	InDel		scaffold317	54070	54165	96	TTGGCAGGTGTTTAAGGTCA	ATCGGGGCTACCCAAATGAT
Chromosome 3	3Bin20	48.291	BVWS02419	SSR	(ATG)7	scaffold387	639802	640054	253	TCAATGGTGGTGAGAGCTGA	AGAAAATGGAGGGGTTGAGG
Chromosome 3	3Bin20	48.291	BVWS00060	SSR	(CTT)7	scaffold387	651243	651629	387	TAAAGCCGTTTTCCCATAACTTGA	CATTGTGAATTAATTGTTGGTCGG
Chromosome 3	3Bin20	48.291	BVWS02312	SSR	(AAG)3	scaffold387	863425	863667	243	AAGGGTCACAACAAAGGTAG	AACACTGTATAGCGGTCAAA
Chromosome 3	3Bin20	48.291	BVWI00243	InDel		scaffold387	903257	903406	150	TCACAGGTAGAAGTCTGGTTG	AGAAGTTTTAAATACAAAGGTAGGTCA
Chromosome 3	3Bin20	48.291	BVWI00242	InDel		scaffold387	2253198	2253333	136	TCTTCAGTGCTCACACTGTT	TTTGATTACCACTTCTAATTGCTG
Chromosome 3	3Bin21	51.867	BVWS02416	SSR	(TCA)5	scaffold387	1232139	1232400	262	AGGGCTGCCTAGTTCACAAA	TCCATAGTTAGGCAGAAAAGCA
Chromosome 3	3Bin22	53.293	BVWS02336	SSR	(TTC)8	scaffold387	1270605	1270721	117	TGATCAGAGCAAACGGAATG	CTCTGCCATAAATCTGAAGCC
Chromosome 3	3Bin23	55.024	BVWS02376	SSR	(TTTTC)5	scaffold387	1596498	1596649	152	TTGTTGGAATTGTGGAGCAA	TTCTGCAACACCAAATTCAGA
Chromosome 3	3Bin24	59.688	BVWS02218	SSR	(ATG)3(CT)3	scaffold387	2159907	2160313	407	GCAAGGCAATAGACGATG	TTGGTTGTAGGCGATGGT
Chromosome 3	3Bin25	65.215	BVWS00270	SSR	(TC)10	scaffold387	2859688	2859842	155	AACGAAGTTTGCATTTCGATCATT	TTTGCAAATGGTGCCAGCTT
Chromosome 3	3Bin25	65.215	BVWS00048	SSR	(TA)23	scaffold660	1024486	1024662	177	TCAAAAGGTTTGCCCTAAATGAAA	TGCTGATCTCCCATTCTTAACCTC
Chromosome 3	3Bin25	65.215	BVWS00045	SSR	(AT)13	scaffold660	1001467	1001599	133	TGACTTTGGGTTTTCTTTAGAGCAT	TTGGAGGACTTGTGGAGAATATGA
Chromosome 3	3Bin26	65.821	BVWS02293	SSR	(ATT)3	scaffold660	182744	183134	391	TCTCATCACTTCTCCATA	CAACAACCAATTTAATCA
Chromosome 3	3Bin26	65.821	BVWS02490	SSR	(ATT)8	scaffold660	121820	121971	152	AGATGCCCCATTCAGTTTTG	TTGAAGGAGAGAGGGAATGG
Chromosome 4	4Bin1	0	BVWV00028	SV		scaffold47	74647	75150	504	GCATATCTAATCTATGAGCACCTAC	ACAATATTTTGTTGTAGAGTAGAGGA
Chromosome 4	4Bin1	0	BVWS01708	SSR	(ATT)5	scaffold47	328582	328860	279	GGGTTTGTTTCCATTTCCCT	GGAAGGGTTCTGCATGTGTT
Chromosome 4	4Bin1	0	BVWS01750	SSR	(TCT)5	scaffold236	186087	186306	220	CAAAAGAAACACGCACGTTG	ACTCGTCGAAACGGAGAGAA
Chromosome 4	4Bin1	0	BVWS00457	SSR	(CT)8	scaffold132	1786394	1786628	235	GCACTGATGCAGATCCAGAA	TACTTCCAGGTTCCATCCCA
Chromosome 4	4Bin2	2.214	BVWS00110	SSR	(AT)11(GT)12	scaffold132	540955	541100	146	GGGCCTGTGATCCATAGAGTAAAA	GATGCATGCTTAAATTCTTATTTCTTCA
Chromosome 4	4Bin2	2.214	BVWS00410	SSR	(GA)8	scaffold132	1330566	1330775	210	TTTGCAGTGAAAGGAATGGA	TGCCACAATTTAAGGCAACA
Chromosome 4	4Bin2	2.214	BVWS01192	SSR	(AT)7	scaffold132	1587392	1587620	229	AAATGCTGCTTTAATTGGAAAAA	AGGCTTGACAAGATGGGATG
Chromosome 4	4Bin2	2.214	BVWS00458	SSR	(AT)8	scaffold132	2167740	2168005	266	GGATGGAAAAATTGGAAAGAA	TGAGGCGACTGTGGTTCATA
Chromosome 4	4Bin2	2.214	BVWV00011	SV		scaffold1213	127273	127999	727	TGACAAGCTGCAATGAATGA	AGTGACTGGCTTGATACCAT
Chromosome 4	4Bin2	2.214	BVWV00009	SV		scaffold1213	219463	220316	854	TTCTTGAGGAGGCACACAGC	ATTCTGCTGGTCCAACTCGT
Chromosome 4	4Bin3	5.283	BVWV00058	SV		scaffold635	76640	77110	471	ATGCTTAGTAGGCGGGTTTC	TGCCGGAGATTTTAGACTGT
Chromosome 4	4Bin3	5.283	BVWV00057	SV		scaffold635	150833	151564	732	AACCGAGAGTGGTTTTCCAG	GTGTGTGAGAAGTCCAAACG
Chromosome 4	4Bin4	6.466	BVWI00069	InDel		scaffold635	193994	194115	122	GTTGATAGGCCTCCCTGTTT	CTTAAAAATATTACCCTAATTGCTCAC
Chromosome 4	4Bin5	9.385	BVWS01450	SSR	(AATT)6	scaffold25	22464	22733	270	TGATCCTCCCTTATGCCAAC	AGAGCCTAGCACACGTCCAT
Chromosome 4	4Bin5	9.385	BVWI00197	InDel		scaffold25	1136987	1137132	146	AATTGAATATGGTGTCGTGTTT	CAGAGAGGGTGAATAGATGTG
Chromosome 4	4Bin6	11.037	BVWS00405	SSR	(AAG)6aga(AGG)9(AAG)6	scaffold25	2164963	2165166	204	AATGGTTGCGTTGAAGTTCC	TTGGCATCCTCTTCTTCTTCA
Chromosome 4	4Bin7	11.772	BVWI00276	InDel		scaffold25	2777364	2777509	146	GGAAACTCTTCTTTAGGGGGTTA	CTGCAGGACAAAGAGGAACA
Chromosome 4	4Bin7	11.772	BVWV00063	SV		scaffold25	2778749	2779361	613	CTCGATCGGGGACCCAATTT	TGTGAGTGATTAGGATTGACAACA
Chromosome 4	4Bin8	12.505	BVWV00069	SV		scaffold25	2910453	2911896	1444	TGACAATGGCAAGAATAACG	TATACGTGCATAGTCGAGGT
Chromosome 4	4Bin9	15.212	BVWI00134	InDel		scaffold208	615527	615661	135	ACATCTCACTTAGGATGGGTTA	TTGGCAATACCTGGGTCAAG
Chromosome 4	4Bin10	17.147	BVWS02428	SSR	(TCT)6	scaffold208	276061	276176	116	TTGGATGGGGAACTGAAGAG	GGCATGAACTTCTTTCACCC
Chromosome 4	4Bin11	17.671	BVWS00659	SSR	(TA)9	scaffold166	37444	37719	276	CCTAACTCAAACTTGATGACGGT	GCAATTTTAACAAAGGAAAGGAA
Chromosome 4	4Bin11	17.671	BVWS00660	SSR	(TTC)5	scaffold166	78493	78766	274	CATGCGCATCTAGCAAAAGA	GCTTAGATGGGAGGAAAGGC
Chromosome 4	4Bin11	17.671	BVWS00589	SSR	(AAT)8	scaffold302	83692	83828	137	CCCAAAGAGGAAAAGACGTG	AGCTGGCTTCCATATTCCCT
Chromosome 4	4Bin12	18.202	BVWS02225	SSR	(CT)3(AT)3	scaffold141	150051	150450	400	ATGTCATAATCCTAAGTTGA	GATTTGTGGATGAAGAGTA
Chromosome 4	4Bin12	18.202	BVWS02041	SSR	(GT)6	scaffold141	271292	271462	171	CGGCTCTTGATGCTTTTGAT	TCATAATTGATGGGTCCGGT
Chromosome 4	4Bin12	18.202	BVWS00898	SSR	(GA)10	scaffold141	365611	365714	104	AACCAATTGCATGGACCAAT	TGTTCTTCCCACATGCTTGA
Chromosome 4	4Bin12	18.202	BVWS00808	SSR	(TTAT)5	scaffold141	529367	529630	264	TCGACCTGGAATAGGTGAGG	AGCAAGTGATTCCAGCCAAT
Chromosome 4	4Bin12	18.202	BVWS00807	SSR	(AT)13	scaffold141	554350	554515	166	CCAAATGAGAGTGAGAGCGA	TCCATGGGAATTAAGAAGGAA
Chromosome 4	4Bin12	18.202	BVWI00330	InDel		scaffold141	667037	667150	114	GCATAAAATTGAGAATCAATACGTGA	CCTATTTGTAATTTTGTACCGACTC
Chromosome 4	4Bin12	18.202	BVWS00857	SSR	(AGA)6	scaffold141	699281	699458	178	TGAGGAGATTTGGGAGAGGA	CCCTTGTCTTGCACAACCTT
Chromosome 4	4Bin12	18.202	BVWS01427	SSR	(TCTTTT)5	scaffold159	798220	798429	210	TGCATGGAGCTCATCACTTC	TGGGGCTTACCCTCTTCTTT
Chromosome 4	4Bin12	18.202	BVWS01034	SSR	(AATA)5	scaffold159	974236	974483	248	GGCTGAGGTGAGTGATGTGA	CGTATTAACAAAACGGCAAGC
Chromosome 4	4Bin12	18.202	BVWS00933	SSR	(TATT)6(TTA)11	scaffold159	1290109	1290408	300	CCATCCTAGGAACCATGGAA	CCATGGCCTTATTCAACCAC
Chromosome 4	4Bin12	18.202	BVWS01183	SSR	(TTA)5	scaffold159	1524850	1525119	270	AAGGCTTGATCTCTCACCCC	CCCCAAGCTTGATAGATTGTTT
Chromosome 4	4Bin12	18.202	BVWS00564	SSR	(AT)9ttacctaggagtgagtgttaaaactattctttgtcctgctaacactattt(TA)12	scaffold194	243891	244071	181	TGAAGGATGTAACACCCATAACC	TCCTGACAGTAGACCCTGCAT
Chromosome 4	4Bin12	18.202	BVWI00129	InDel		scaffold194	428737	428817	81	AGTCATTCCCGTAAGCTTGG	ACAGAAACCTGAATGGAAAACA
Chromosome 4	4Bin12	18.202	BVWS01521	SSR	(TC)6	scaffold205	12825	12925	101	GGGGGATGAAGATTGGAGTT	CCCATTCTCTCACCAAAGGA
Chromosome 4	4Bin12	18.202	BVWS01803	SSR	(CT)12	scaffold205	96175	96401	227	GGCATACATTCCAACCCATC	AGGGACAGAGAGCGACAGAG
Chromosome 4	4Bin12	18.202	BVWI00259	InDel		scaffold205	98407	98547	141	GGTTGGATGCATACTCCCTTA	ACTTCTTTCGCTTCCTTGTAAC
Chromosome 4	4Bin12	18.202	BVWS01144	SSR	(CT)7	scaffold338	324266	324507	242	CGGTTCAAATGATCTCATTAGGTT	TCAAGTTGGGTTTTAGGACCA
Chromosome 4	4Bin12	18.202	BVWI00091	InDel		scaffold338	388347	388494	148	GTTATCCCACACTTCTCGTTG	AGAGAAGAGAAAATACAAAGAACCTT
Chromosome 4	4Bin12	18.202	BVWI00260	InDel		scaffold136	354468	354599	132	AAAAACCTCCTATCCGCATTA	AGTCTAACAGTCAAGTAGCAC
Chromosome 4	4Bin12	18.202	BVWS02022	SSR	(AAT)8	scaffold136	1075690	1075938	249	ACACACACCGGAATACATGC	CACATCCAATGCCTAAAAGGA
Chromosome 4	4Bin12	18.202	BVWS00661	SSR	(AT)26	scaffold136	1303735	1304012	278	TAGGGTAGGGCCAAGTCAAA	TGTCCGAGTTGTTTTGTGAGA
Chromosome 4	4Bin13	20.088	BVWS02367	SSR	(TTA)8	scaffold136	1075787	1075938	152	ACACACACCGGAATACATGC	TGATTGTTCAATGGAGTAAATCACA
Chromosome 4	4Bin13	20.088	BVWS02268	SSR	(GA)3	scaffold136	1271465	1271847	383	GGAGTTGACCCGATTGCC	CAAATCTTCCGCATCCTC
Chromosome 4	4Bin14	24.268	BVWS01592	SSR	(TTTTC)6	scaffold22	2243467	2243724	258	TTTTTCCTCTTTTTCCTATTTTCTC	GAGGCAAATTACCTTTCGCA
Chromosome 4	4Bin15	27.234	BVWI00343	InDel		scaffold41	334401	334531	131	TAAATGCATTGCAAGTAGGG	ATATTTTGGTAGGGGAGATGG
Chromosome 4	4Bin15	27.234	BVWI00344	InDel		scaffold41	732200	732298	99	AAAAGCGCATAACAAAAGATG	TATCGCAGTCTACGCAAATA
Chromosome 4	4Bin15	27.234	BVWS00102	SSR	(TA)10	scaffold22	2920131	2920263	133	TGTCCATCAATTTTCAACCTCAGA	GGACAGGTGGGGTTTATTCAAGTA
Chromosome 4	4Bin16	34.71	BVWS00326	SSR	(TTA)16	scaffold22	1851819	1852000	182	TGAGCTTTATTTCTCATCTTCGCA	AAAATTTGGATCCTTAGAAATGGACA
Chromosome 4	4Bin16	34.71	BVWS02366	SSR	(GAA)13	scaffold22	1644987	1645116	130	TTTCTCCACACTTCTCTCTGGA	GAAAGGCATCAATGGAGGAA
Chromosome 4	4Bin17	42.646	BVWS00241	SSR	(GA)13	scaffold22	214935	215075	141	AAGAAACCTCCAGAACAGCTACCC	AGAGCAGGCACACAAACAATACAA
Chromosome 4	4Bin18	46.213	BVWS00207	SSR	(AG)16	scaffold170	414431	414592	162	CTAATCAATTCGCTTCTCTCCCTG	TCCTAAAGGAATCGGAAAGGAAAG
Chromosome 4	4Bin18	46.213	BVWS00208	SSR	(TC)28	scaffold170	461899	462071	173	GCAAAGATTGTCTATGAAGCAGCA	GCTCATTGGCTTCTTGAATCTGTT
Chromosome 4	4Bin19	49.914	BVWS00124	SSR	(AG)15	scaffold170	1963711	1963870	160	AGAGACTTCTCATATGCAAACTTGATG	TCGTAGCTAGTCGTTCTTTTTGTGA
Chromosome 4	4Bin19	49.914	BVWS00125	SSR	(AT)27	scaffold170	2199927	2200073	147	AAGATGGGAAATGCTCACACAACT	GGCCAAAATGACCAATCTTTTTAAT
Chromosome 4	4Bin20	51.116	BVWS02220	SSR	(CA)3	scaffold170	1572209	1572738	530	GCAACAGACAACTCCTCGTT	GCGGCATAATGCAGACAG
Chromosome 4	4Bin21	52.752	BVWS02335	SSR	(TTC)5	scaffold170	2473935	2474141	207	ATCCAAATGCTTGTTCCGTC	TAACTAGCCGGCATCTGACC
Chromosome 4	4Bin21	52.752	BVWS02243	SSR	(GA)3	scaffold170	2474512	2475002	491	AAGAAGCCTGAAGAAGGAAA	AGGAACTACTTCGACGGATC
Chromosome 4	4Bin21	52.752	BVWS02486	SSR	(AAAG)6	scaffold170	2586188	2586350	163	GGTCTAGATTTGACCCTCTCCA	CTTCACCTTCACCTTCCCAG
Chromosome 4	4Bin21	52.752	BVWS02329	SSR	(AT)5	scaffold170	2802202	2802459	258	CTAACATCCTTTGGCATAAC	GATTTCTTGGACATACATTG
Chromosome 4	4Bin21	52.752	BVWS02301	SSR	(TAAT)3	scaffold170	2859234	2859933	700	GCACCCGAAGGTTCTAAG	AATTGGTCGTCAAATGAG
Chromosome 4	4Bin22	57.217	BVWI00263	InDel		scaffold170	3106487	3106629	143	ACTAAAGATTGATGAACTAGAATTTGT	CCAAATGATTATGAATATCCTCCAAC
Chromosome 4	4Bin22	57.217	BVWS02425	SSR	(CT)7	scaffold170	3265565	3265744	180	CTAGCATGGCGACGACTGTA	TTTTACAAGGAAACCCATCTTCA
Chromosome 4	4Bin23	58.339	BVWS00081	SSR	(TC)14	scaffold170	3949435	3949595	161	ACAATTCCAGGTTTCTTTTTGGGT	AAAAACATGTGGCATGTGCATACT
Chromosome 4	4Bin24	60.514	BVWS02372	SSR	(GAA)7	scaffold170	4456616	4456860	245	ACCTCAAGAAATGCGCTGAT	TGGCATAAAACTCCTCCACC
Chromosome 4	4Bin24	60.514	BVWI00264	InDel		scaffold170	4909435	4909529	95	GCAAGAGTTAGGACACAATGA	AATCCTCTACACCGTCAGAA
Chromosome 4	4Bin24	60.514	BVWI00265	InDel		scaffold170	5620025	5620107	83	AAATCTTCCTGACTTGCACA	CCTGTATAGCCTGCTTTTCC
Chromosome 4	4Bin24	60.514	BVWS00025	SSR	(AG)14	scaffold170	5784793	5784926	134	AATGCAAATTAATTAGATGAGAAAGGAA	CAGAATCACTCTCCCCATCATCT
Chromosome 5	5Bin1	0	BVWS02471	SSR	(AG)25	scaffold2	91826	92051	226	GCACAATTGGTTATTGAAGCG	CAAAATGCATGTGTTGAGCA
Chromosome 5	5Bin1	0	BVWS02151	SSR	(ATCCCA)6	scaffold2	227580	227850	271	TGGGACACAATTTGAAGCAA	ATTCCGACCTGGGAATAAGG
Chromosome 5	5Bin1	0	BVWS02295	SSR	(AT)8	scaffold2	1191615	1191903	289	AGTGATTCGACGATGCTG	CAACGAAACCTTATTATCCA
Chromosome 5	5Bin1	0	BVWI00261	InDel		scaffold2	3552604	3552743	140	TTGAAGTTTTTCAATACAAAATGGGA	ATTCCTAACCCGGACGAGAA
Chromosome 5	5Bin1	0	BVWS00215	SSR	(TC)14	scaffold2	3566639	3566759	121	GGCTCTCCGTAACTTTGTCTTTGA	CATAAAGGAAGCTGAGTCCTCGAC
Chromosome 5	5Bin2	4.843	BVWS00339	SSR	(TC)11	scaffold2	5728527	5728664	138	TTGTTTCCTGGGAATCCTTTTTCT	TCACTCTTGTCTGGCCTTTAAGAGA
Chromosome 5	5Bin3	10.132	BVWS02370	SSR	(TCT)5	scaffold2	5324853	5325053	201	ATGGAAATTTGGAGAAGCCA	GATCGTAGAAACCCGAACGA
Chromosome 5	5Bin3	10.132	BVWS02422	SSR	(GAA)10atccattttcttcccctgcttctcttctgcacgtaatttcttgtcaaatata(AT)7	scaffold2	6367817	6368082	266	ACCTGATAACTCGTGCGCTT	AGCTCAATTTCACAGGCGAC
Chromosome 5	5Bin3	10.132	BVWS02405	SSR	(AG)7	scaffold2	6722577	6722839	263	GTCGTCACCGGTTGCTTAAT	CCTGAGCCACTTTCCTCAAA
Chromosome 5	5Bin3	10.132	BVWS01498	SSR	(AATA)5	scaffold2	6974299	6974562	264	ATGAATGGCAATTAAGGGCA	TGCATAGGCAGAAGCTGTGA
Chromosome 5	5Bin3	10.132	BVWS00253	SSR	(GA)14	scaffold2	7029486	7029642	157	TTTATCTATGTTGCTTCCCCTCCA	TGTGGGCTCAAAATGAAGAAGATT
Chromosome 5	5Bin3	10.132	BVWS02286	SSR	(TC)3ttcttcttagctctcttgtgagttcccaactttctcttagccacttttagtg(CT)3	scaffold597	354699	355067	369	GGAATTTGATCCGGGAAGT	CCCTAACATTATGGGAAATAGA
Chromosome 5	5Bin4	11.294	BVWI00076	InDel		scaffold597	1480282	1480422	141	TGAATTACTTTGTTCATCTTATTACC	AAAAAGAAAGTCTGTCTGCAT
Chromosome 5	5Bin5	14.101	BVWI00075	InDel		scaffold597	887400	887549	150	TCATCATTCGATACTTGACACT	ATCTCCAACCGGTACCATTA
Chromosome 5	5Bin6	19.339	BVWI00074	InDel		scaffold597	635347	635453	107	CCCGAGGAAAGACTCGAAAC	TCTCAAATGGCTCCGGACTT
Chromosome 5	5Bin7	20.721	BVWI00073	InDel		scaffold597	34946	35037	92	GGTGTTTCAGATGTTGCTGA	CCTTTACCATTTGACCCTACG
Chromosome 5	5Bin8	23.653	BVWI00021	InDel		scaffold92	28395	28534	140	AGCGATTGAAATGGTTAAACG	TTCTTTCCTACGTTGGCATT
Chromosome 5	5Bin8	23.653	BVWI00278	InDel		scaffold92	210130	210241	112	CGTTACGTTATACTTCCCTCCA	AGACTAAAGAGAAAGTAAAGTCGAAAT
Chromosome 5	5Bin8	23.653	BVWS02381	SSR	(CA)8	scaffold92	660549	660813	265	GATGTTCCTGCCTTTTGGAA	CACCTTTGAATTTTAACCCCC
Chromosome 5	5Bin9	26.002	BVWI00277	InDel		scaffold92	526698	526840	143	TTTAGAAAAATCGGCTATAAGCA	ATAAAGTAATATGTTCAGTATGGTCA
Chromosome 5	5Bin10	27.554	BVWI00024	InDel		scaffold92	984432	984568	137	TCCATAATTTACCGTTCAAGGAA	TGGGAAAGGTAAGTTCTCACT
Chromosome 5	5Bin10	27.554	BVWS01068	SSR	(AAT)6	scaffold93	174863	175122	260	CGGCCCACAATGTTAATTTC	CACCTGGCAACATGTTCATT
Chromosome 5	5Bin10	27.554	BVWS01067	SSR	(TA)9	scaffold93	299857	300134	278	CCTGATCTATTGCCTAGTGATAGAAG	TGGAAAACGAAAGTTGTCAAAA
Chromosome 5	5Bin11	29.592	BVWS02259	SSR	(AG)3gaaaaaagttttaaagtaaaattgcatctaccgaaaatgttatatcaagtatacgaactt(TA)3	scaffold93	431984	432541	558	GCTGGACCTTTAATCTTG	TAACCCGCTCTATTCACT
Chromosome 5	5Bin11	29.592	BVWS02440	SSR	(AAT)15	scaffold93	755925	756164	240	TCAAATCCAACCAAATATTGC	GAGAAGGAAACATCACCAACG
Chromosome 5	5Bin11	29.592	BVWS01686	SSR	(TA)6	scaffold93	1308440	1308686	247	TGGATAGAATGGAAAGCTCTGA	TCCCACACATCATTCCAAAA
Chromosome 5	5Bin12	30.952	BVWS01163	SSR	(AAT)9	scaffold93	2181446	2181614	169	GGTTGACAACACTCCCTTAGC	AGCTTAAGAACAAGGCGCAA
Chromosome 5	5Bin13	31.666	BVWS00854	SSR	(ATT)8	scaffold93	2653633	2653758	126	TTCCCTCATGGGTAGGTGTC	TAGGGGCTCTTTCATCCCTT
Chromosome 5	5Bin14	32.863	BVWS01455	SSR	(TTTTTC)5	scaffold93	2806977	2807222	246	GCAAGATGTGTCTGCCACC	TGCTGAAGTTCCAAAAACTGAA
Chromosome 5	5Bin14	32.863	BVWS01511	SSR	(AAT)6	scaffold93	3490653	3490870	218	CCTACCCCATAGTTTTGGCA	CCTCGAATGTGTCGACTTGA
Chromosome 5	5Bin15	36.54	BVWS00419	SSR	(AAT)5	scaffold93	3572896	3573080	185	GATGGAAGCTCTCCCTTTCC	TCATTCCCGCTCTCTTCATC
Chromosome 5	5Bin16	39.576	BVWS01950	SSR	(TGG)5	scaffold738	96128	96251	124	TTGTGTGGTTGCTTTGTTGTT	TCATTTACAGCAGCCAGCAG
Chromosome 5	5Bin16	39.576	BVWS00354	SSR	(TTC)12	scaffold738	92488	92600	113	GCTTTCCATTTTTCCCATTTCTCT	AGAAGAAAAAGGGAGGAGCAATCA
Chromosome 5	5Bin16	39.576	BVWS00971	SSR	(AT)9	scaffold650	65269	65493	225	TTTATTGATCAACGAAATGAAAAA	GCACTGCAAGTCTCACAACAA
Chromosome 5	5Bin16	39.576	BVWS00464	SSR	(GAA)7	scaffold426	581333	581604	272	TCCCCTTGATCCACTGTCTC	TCAAACCTTCGCCTTCAATC
Chromosome 5	5Bin16	39.576	BVWS00705	SSR	(GAA)5	scaffold426	557986	558214	229	AAGAAGTTGTGCGGTTGAGG	AGTGGGACCCATCTTCACCT
Chromosome 5	5Bin16	39.576	BVWS01752	SSR	(AT)7	scaffold426	360195	360374	180	GCCTACATTTATTGCACTATTACACA	CCAATAGCGAATGGAAAATGA
Chromosome 5	5Bin16	39.576	BVWS01374	SSR	(TA)17	scaffold426	290820	291066	247	CTGAACGGGGAGAGAGAGTG	TGAGTGGTGGTTGAGCAAAA
Chromosome 5	5Bin16	39.576	BVWV00019	SV		scaffold57	353906	354338	433	TCGCAAGTTTGTGTCCTAAG	TCAAACTTGGTCCGTTTTGAT
Chromosome 5	5Bin16	39.576	BVWV00018	SV		scaffold57	245107	245600	494	ACTAAGTCAGGAGTGCGTCA	AGGGAGGCTAGGGAGTGAAG
Chromosome 5	5Bin16	39.576	BVWS02096	SSR	(TC)7	scaffold24	1558908	1559013	106	GGTCCTCTCGAGGTTGAATG	CTTGAGGCATAGCAGCATTG
Chromosome 5	5Bin16	39.576	BVWI00194	InDel		scaffold24	738556	738703	148	AATGTCAAATCATTGCCGAT	GCTCCTTCTATAAGCAGTCT
Chromosome 5	5Bin17	41.309	BVWS01433	SSR	(CTT)8	scaffold10	71038	71190	153	GCATGGTTCGAATAGCCATC	GGTGTCCTTGAAATGGGAAA
Chromosome 5	5Bin17	41.309	BVWS00651	SSR	(TA)14	scaffold10	140763	140925	163	ATCCAAATTTGATGGGTTGC	AGGATATGAATGGGGAAGCC
Chromosome 5	5Bin18	43.503	BVWS00652	SSR	(ATT)7	scaffold10	597011	597293	283	CGACAACACGTGACACACTT	CGGCTGGAATTAAAAGAATCTC
Chromosome 5	5Bin18	43.503	BVWS00658	SSR	(CT)13	scaffold368	343906	344174	269	TTAGCCTAAGCAAGGGTTTTT	AAGTACACATTTTAAACAATCAATCCA
Chromosome 5	5Bin18	43.503	BVWS00455	SSR	(TA)7	scaffold368	13191	13373	183	GGGAAATTCCTTGGACATCA	AAAGGGAAGGTGAAAATTGC
Chromosome 5	5Bin18	43.503	BVWV00049	SV		scaffold234	85641	86203	563	CTCCTTCTGCGTTGTTGGTT	TTTTCGTTAAGGTGGTGTCATTTA
Chromosome 5	5Bin18	43.503	BVWS00482	SSR	(AT)6	scaffold234	84501	84700	200	AACTCTCGAGATGCCCTTCA	CAAACCTTTAAGTGCCTGGG
Chromosome 5	5Bin18	43.503	BVWI00116	InDel		scaffold124	221243	221383	141	TCAATATTGCTTTCCTAGTCCA	CTGTTTTCTCAGCTCATTAAAGT
Chromosome 5	5Bin18	43.503	BVWS01953	SSR	(AAT)6a(AG)6	scaffold124	214563	214773	211	CCATTATTGTTGAAAGTGTCGG	CCTTCTTGCCGTTCAAACTC
Chromosome 5	5Bin18	43.503	BVWI00016	InDel		scaffold91	574066	574179	114	AGACCTAAGAAACACAATTATCCAG	GGAAATTTCTCAACTGTAGAAGGA
Chromosome 5	5Bin18	43.503	BVWI00015	InDel		scaffold91	422764	422860	97	GCAAAATTGTGCTAAATTCTCAATAA	TCCTTTGCTTATCGTGGTTAAT
Chromosome 5	5Bin19	46.416	BVWS01999	SSR	(CTT)9	scaffold465	207886	208156	271	TTTCCAACTCCCTCTCTTCAG	AGCGGCGTTGTTGAGATAGT
Chromosome 5	5Bin19	46.416	BVWS00316	SSR	(TTTA)5	scaffold465	111520	111661	142	CTTGCAGTTCTCGCATGACATTAC	TCAGCCTTGGGAGAAATATGGTTA
Chromosome 5	5Bin19	46.416	BVWS00955	SSR	(AAT)5	scaffold193	863361	863589	229	AGACATTATTTGGTAGTGTAATTTGTG	TTGCCAATGGATCGGTATTT
Chromosome 5	5Bin19	46.416	BVWV00037	SV		scaffold193	841111	841723	613	TGTAATCATCCACTACTCTTCG	GGAATAAACCTTGTTCGATTACC
Chromosome 5	5Bin19	46.416	BVWI00160	InDel		scaffold193	623386	623469	84	AATTTTAATGATTGCTTCATACTTGA	ACTTCTTATGACAACTTGCTAC
Chromosome 5	5Bin19	46.416	BVWI00159	InDel		scaffold193	605406	605538	133	AACACTCGACCCTACTCTTAC	GGGTTTAGTATCATTGTAGACAGAAA
Chromosome 5	5Bin19	46.416	BVWS01557	SSR	(AT)10	scaffold193	349357	349633	277	CGGGAGACTTTTCAGATTGG	TCCGCATCGTGTATTCAACT
Chromosome 5	5Bin19	46.416	BVWI00158	InDel		scaffold193	211746	211879	134	TTCACATATATCATTATACCCCAATAA	GGTTAAGAAAATACAGGTCCAA
Chromosome 5	5Bin19	46.416	BVWI00092	InDel		scaffold46	114129	114269	141	TGATCTCCTCTCTACCTATACCTC	CCTCTAGGGCTCCTAACACC
Chromosome 5	5Bin20	47.015	BVWS00769	SSR	(TC)15	scaffold46	188016	188200	185	CGAAGAGAGAGAGAAGGCGA	GCCAATAAATCACCGGAAAA
Chromosome 5	5Bin21	49.163	BVWS00362	SSR	(CT)13	scaffold1	145303	145419	117	AGCAATTTTCCAAAACATGTAGGG	GTGAAGAAGAACGAGAGGGCTG
Chromosome 5	5Bin21	49.163	BVWI00178	InDel		scaffold1	161224	161369	146	TTGGGTAACTACCCGCTCCA	ACGACTAGGGCATTCCAACG
Chromosome 5	5Bin21	49.163	BVWS01099	SSR	(ATG)5	scaffold1	327690	327905	216	CGGTTGGATGTTTTTCTCAAA	TTCTTGAACCCTGCCACTCT
Chromosome 5	5Bin21	49.163	BVWS01643	SSR	(AATA)5	scaffold1	333953	334108	156	CCCCCACTTGTGCTATGAAA	GCGGCACCCAACTAATCA
Chromosome 5	5Bin21	49.163	BVWS01968	SSR	(AAT)5	scaffold1	1004650	1004997	348	AAAGGGACAGTGGAAGCAAA	ACATTCAATCTTACTCCAAACCA
Chromosome 5	5Bin22	53.039	BVWS00327	SSR	(TTTTA)4	scaffold1	1544489	1544646	158	GAAATGTTCCTTGCTTCCTGTG	TTGTTCTGTTCAGCATTCAAAGTT
Chromosome 5	5Bin22	53.039	BVWI00193	InDel		scaffold1	1633564	1633707	144	CAGTAATGTCAGAATACTAGAGAACA	GAAATTGCACAACTCTAAGAAAATAG
Chromosome 5	5Bin23	69.664	BVWS02380	SSR	(AT)8	scaffold108	5338717	5338878	162	TTTCGCTGTCTTGGTTTTGA	CCGAAGAATATCCATCCCCT
Chromosome 5	5Bin23	69.664	BVWS02408	SSR	(CAG)7	scaffold108	4916445	4916712	268	TGACAATGGGAAAAGCATGA	GCTGGACTGCGAGCTACTCT
Chromosome 5	5Bin23	69.664	BVWS02447	SSR	(TAT)15	scaffold108	4392818	4393040	223	CAGAGGAACGAGAGGGAGTG	GGGGAGCCCATATTTTAACC
Chromosome 5	5Bin23	69.664	BVWS02445	SSR	(AAT)10	scaffold108	4375281	4375530	250	GAACTTTCAAATTTACAACAACAAAC	CAATTTAATCCCTTCCATGC
Chromosome 5	5Bin23	69.664	BVWS02229	SSR	(AT)4	scaffold108	4171680	4171831	152	GTTTGCGTGGGTGAACTATA	ACTAAGAACACCAACGACCC
Chromosome 5	5Bin23	69.664	BVWS02482	SSR	(AG)8(TG)8	scaffold108	3766347	3766521	175	AGACAGGGAAATCGCAGAGA	GGTTAAAGGACGTCGGGATT
Chromosome 5	5Bin23	69.664	BVWS02394	SSR	(TA)6	scaffold108	3570634	3570912	279	CCTGGAATTTCATTTGCCAT	TGATACCCCACTCCCACAAT
Chromosome 5	5Bin24	71.307	BVWS02435	SSR	(TAT)11	scaffold108	2931842	2932049	208	TCAATTCCAATCATCCATCC	TAATGGCCGGACTTTATGC
Chromosome 5	5Bin24	71.307	BVWS02228	SSR	(CTT)3	scaffold108	2608030	2608410	381	TCCAAAACTGATGTCCTA	CCTATCCTCTAAACTCCC
Chromosome 5	5Bin25	72.147	BVWS00087	SSR	(GA)16	scaffold108	2905693	2905822	130	TCAGTTTTCAGACATCAAATCCTTG	GATCGGATCTTTGCATCTGTAGC
Chromosome 5	5Bin26	74.455	BVWI00228	InDel		scaffold108	2594579	2594674	96	AGTGGGTGGATAACCGTCGT	CCGAAATTCGCCCTCCATTC
Chromosome 5	5Bin27	76.528	BVWI00227	InDel		scaffold108	1770035	1770164	130	CGTAAAGAATTTGTTGAGTCGAA	TTAAATAAAATCTCATAGTGGAAAGC
Chromosome 5	5Bin27	76.528	BVWS00106	SSR	(AG)13	scaffold108	1688184	1688328	145	TGGCCTAGAAGATTATTGAGCTGC	CATTATCACATGGCAGATAATGGAAA
Chromosome 5	5Bin28	78.739	BVWI00226	InDel		scaffold108	1108587	1108719	133	CTGTATCGCCATTCGTCAAC	AGTATTCTACCATTTTGGTTATTGTCA
Chromosome 5	5Bin29	81.249	BVWI00225	InDel		scaffold108	799760	799892	133	TGAAAATGATTGAACTTTGTTAGACT	TCCAACTATAACTGAAAAATACATCG
Chromosome 5	5Bin30	85.288	BVWS02255	SSR		scaffold108	695799	696001	203	ATGTGGCGTTCGATGGACTG	TTCATCTGCGGCATCTGTAT
Chromosome 5	5Bin30	85.288	BVWS02365	SSR	(CAG)5caacaacaacagcatcctcagctgcaacaacaa(CAG)5caacaacagcatcctcagctgcaacaacaa(CAG)5caacaacagcatcctcagctgcaacaacaa(CAG)5caacaacagcatcctcagctgcaacaacaacaacagcagcagcaactttctcaaata(CAG)5caactttctcaaata(CAG)7	scaffold108	561068	561427	360	AGCTGCAACAGCAACATCAG	GCTGGCTTTGAAGCTGTGAC
Chromosome 5	5Bin30	85.288	BVWS00127	SSR	(TCT)9(TC)13	scaffold108	55497	55651	155	GCTTTAGTTGCTGCAAGATCACAA	CATACCTTCTGCTTCCTCACATCA
Chromosome 5	5Bin30	85.288	BVWS01050	SSR	(AT)12	scaffold227	112780	113008	229	GAATTTGCTTCAGCCTTTGG	TTCATTTCTAGGTTGGTTTTAAGATTT
Chromosome 5	5Bin30	85.288	BVWS02234	SSR	(AG)4	scaffold257	2555830	2556038	209	ATTCAAACAGCAATAGCAGGAG	CAAGGACATCGGCCCAAA
Chromosome 5	5Bin30	85.288	BVWS02409	SSR	(CTT)14	scaffold257	2249919	2250150	232	AGACCCCGCCATTACAGACT	CACTCCTTCTCCCACCAAAA
Chromosome 5	5Bin30	85.288	BVWS02355	SSR	(AT)6	scaffold257	1379764	1379940	177	AGGAATGGATGGGCTTTCTT	TTCAGTGTTCAAATTCTTCAGCA
Chromosome 5	5Bin30	85.288	BVWS02383	SSR	(TCT)8	scaffold257	540664	540805	142	CGCAATCTCGTGTGACATCT	TTACAAACAAGGTCCCAGGC
Chromosome 5	5Bin31	90.232	BVWI00257	InDel		scaffold257	1630960	1631071	112	CAATTCTCACTGACTGTTGG	CAAACCAAACGGCTAATGTA
Chromosome 5	5Bin32	94.339	BVWS02371	SSR	(TC)8	scaffold257	882082	882227	146	TTTGGTCAACCCACAACAGA	TCCCACTTAAGATCATGGGAA
Chromosome 5	5Bin33	96.365	BVWI00256	InDel		scaffold257	509678	509802	125	CAAGTTCAGCAGGAGTTGTC	ACAAAGAGACCCATCTGACT
Chromosome 5	5Bin33	96.365	BVWS01111	SSR	(TA)8	scaffold257	164246	164433	188	AACTCTCACATTTTGACCGACA	GTTTTTGCCGCGAGATTAAA
Chromosome 5	5Bin33	96.365	BVWI00255	InDel		scaffold257	6915	7052	138	ACTCTAGTGATAGCCTAGATAAAAGA	ACAACATTTTGCTTTACATCGTTA
Chromosome 6	6Bin1	0	BVWI00183	InDel		scaffold642	241160	241242	83	AGAGTATAAATTGAATGTGTGATTCG	TGAATTTATCATAACCCATAAACAGG
Chromosome 6	6Bin1	0	BVWI00184	InDel		scaffold642	252870	253011	142	TTTTCAAATATAAGAAGATTAACCACA	AGTTTATCTGCAACGAACTAC
Chromosome 6	6Bin1	0	BVWS02351	SSR	(AT)12	scaffold642	257531	257736	206	ATCCAAACCCGTGTGAGAAG	AACCAAACACACGTGAAGCA
Chromosome 6	6Bin1	0	BVWS00263	SSR	(TC)18	scaffold2537	275468	275608	141	ATGAGAAAATCTAGGGGTTTGGGA	TCCCTTACCCTTTTTCCATCTCTC
Chromosome 6	6Bin1	0	BVWS01840	SSR	(TC)7	scaffold2754	63721	64000	280	GCGATGCAGGTAACAAAATG	CATTCACCATTCGGGAATACA
Chromosome 6	6Bin1	0	BVWS01842	SSR	(TA)12	scaffold2754	153026	153304	279	TGGCTTACAAAGACTGAAGTGC	CTGGGCCAAGCATGAATAAT
Chromosome 6	6Bin2	7.265	BVWS00151	SSR	(TC)6	scaffold992	1583865	1584064	200	GCAAGCATTTTATTTCACGTATGG	TCGAATAAAGTTTAAGAATTTACGAGCA
Chromosome 6	6Bin2	7.265	BVWS02384	SSR	(AAG)8	scaffold992	1347293	1347480	188	TCCAAGTGGCTTGCTCTTTT	TCTCAACCTCAAATTCCGAGA
Chromosome 6	6Bin2	7.265	BVWS02050	SSR	(TA)6	scaffold992	460406	460578	173	TGCGCCCTCTCTACTTGTTT	GGGATTACAATGACTTTGGCA
Chromosome 6	6Bin2	7.265	BVWS02051	SSR	(TA)6	scaffold992	460406	460649	244	TGCGCCCTCTCTACTTGTTT	GCCAATACTCTCGACAAGGC
Chromosome 6	6Bin3	12.226	BVWS02420	SSR	(TTC)7	scaffold2131	252209	252479	271	AAAGGCCTTGTCCACACATC	AGCAGCTCGAAAACAAGAGTG
Chromosome 6	6Bin3	12.226	BVWS01944	SSR	(TAA)6	scaffold2131	148230	148338	109	AAGCTGGTTGAGGCATTGTT	AAATTAGAAAAATTAGTCTACCCCACT
Chromosome 6	6Bin4	15.294	BVWS02413	SSR	(AAT)20	scaffold776	195953	196178	226	GTCAAGTGATTTGGGCATCC	TTGATGTACATGATCGCCAAT
Chromosome 6	6Bin4	15.294	BVWS02424	SSR	(AG)12	scaffold776	758010	758134	125	ACAGCGTTACTGCCGTCTCT	TCCTCCTTCGTCTTCCTTCA
Chromosome 6	6Bin4	15.294	BVWI00268	InDel		scaffold776	664695	664782	88	ACCAGCAGGAGATGAACCAC	TTCTCCATTTGGTCGTTAGAAAATAG
Chromosome 6	6Bin5	17.449	BVWS00117	SSR	(GA)17	scaffold776	1157836	1158079	244	GCCTTCTTGACACTCTACCATAGTCA	TGCTGGGATTGATTGTATGACTTC
Chromosome 6	6Bin6	21.815	BVWI00269	InDel		scaffold776	2071858	2071956	99	AAATAACATATTTAACCAATCCAATCT	GGTAGGAATTAGGTCAGATTCA
Chromosome 6	6Bin6	21.815	BVWS02256	SSR		scaffold776	2309858	2310129	272	ACGATGAACCCAAATCTCCC	GCGATGTTGCGGACGTTGTC
Chromosome 6	6Bin6	21.815	BVWI00273	InDel		scaffold364	11915	12064	150	GGACTACAGAATCTGCCAAC	ACAAAACAACTCATAGATTGCC
Chromosome 6	6Bin7	27.103	BVWS01562	SSR	(GA)7	scaffold364	1376572	1376795	224	GGAGATGGTCATGGAAGCAT	TGGCCACTCAACTTCACAAG
Chromosome 6	6Bin7	27.103	BVWS01038	SSR	(TTA)9	scaffold364	1597378	1597631	254	CCACTCATTTAAATTTTGGGTTT	TTGAACTGTCGTAATTTGATGGA
Chromosome 6	6Bin7	27.103	BVWS00680	SSR	(AT)12	scaffold364	1599141	1599323	183	GGGGGACGTTTGACCTTAAT	TGAACAATCTGAAAGCTAAAATGG
Chromosome 6	6Bin7	27.103	BVWI00274	InDel		scaffold364	1778551	1778670	120	ATGGATTGAGAAACGACCAC	GAATTAAACTACGACCAGGAAT
Chromosome 6	6Bin7	27.103	BVWS00679	SSR	(TA)6	scaffold364	1954838	1955092	255	CAAAACAGAGGGCTGCAAAT	GCAATCTTCGTTTTCGGGTA
Chromosome 6	6Bin7	27.103	BVWS01636	SSR	(AT)6(GT)10	scaffold481	115359	115619	261	GGCGTATTTTGCGATTTTGA	AGCTAGGGCTGCACAAGAGA
Chromosome 6	6Bin8	29.923	BVWI00168	InDel		scaffold481	585117	585245	129	ATTTTGAGGGTGGTGTTTCG	TGTGTGCACTACAATTACATTC
Chromosome 6	6Bin8	29.923	BVWS02442	SSR	(GAA)5	scaffold200	17027	17299	273	GATCTCCTCAAAGCCTTACCG	CGGATCCGATAATCTGCTG
Chromosome 6	6Bin9	34.496	BVWS00530	SSR	(GA)7	scaffold200	312251	312498	248	TCTCACTTGCGTGTGACCTC	GGGGGTTTCTTCTCTTGGTT
Chromosome 6	6Bin9	34.496	BVWS02455	SSR	(AAG)5aaatcgaacgccggagaagaagagaaaac(AT)8	scaffold200	81469	81758	290	AGGCCCAAAACCTAACTTGC	CTTTTGCCCTCGCTCTTTC
Chromosome 6	6Bin9	34.496	BVWS00531	SSR	(AAAT)5	scaffold200	1125507	1125779	273	CGGATTGAAAAATGTCGGAT	CACCTCCTTCTTCAATTTCCA
Chromosome 6	6Bin9	34.496	BVWS00872	SSR	(TA)8	scaffold200	1810525	1810655	131	GGCAAACGAGAGAGAGACTCA	TTTATAAAGCATTAAGAATCACCTTTT
Chromosome 6	6Bin10	42.706	BVWS01358	SSR	(TC)13	scaffold200	1303021	1303241	221	CCCTATTGCCTATTTTTCTCAA	AAATTTGTGCTCTTCGTGGG
Chromosome 6	6Bin10	42.706	BVWI00321	InDel		scaffold200	2359342	2359457	116	GCATCTCGCACCAATTGTCA	TCCATGATATCAATAGTGGTGTATCTC
Chromosome 6	6Bin11	47.233	BVWI00322	InDel		scaffold32	130635	130753	119	TCTACCCTTGCTTCAGTGAT	TTTGCACTTCAAAGTGTTACAG
Chromosome 6	6Bin11	47.233	BVWI00323	InDel		scaffold32	712446	712526	81	GTAAGATGGTCCTCACTTGG	TTGGTGCAACGATTTTAGAAG
Chromosome 6	6Bin11	47.233	BVWS01718	SSR	(TTAT)5	scaffold32	716577	716837	261	ACAAATTGGGGGTATTGGAA	TCTTTTCCGTACAGTACACATCG
Chromosome 6	6Bin11	47.233	BVWI00324	InDel		scaffold32	877077	877197	121	TAAAAGCACAGCTCCTCCAT	CAAAATCTTCCCGAGAGGAAA
Chromosome 6	6Bin11	47.233	BVWI00198	InDel		scaffold44	144563	144706	144	TGTAGCAAGTGATGGAACGA	CCGTAAATAAGCTCTGCCAA
Chromosome 6	6Bin11	47.233	BVWI00199	InDel		scaffold44	198800	198923	124	TTGCAAGCACGGGAGTGTAG	GGTTGATTAAGATAGTGTCACCTCAAT
Chromosome 6	6Bin11	47.233	BVWS01594	SSR	(AT)15	scaffold44	204475	204697	223	TCCATGTTTCACTTGGGTTTC	GCTCTCATCCGAGTGGAAAA
Chromosome 6	6Bin11	47.233	BVWI00090	InDel		scaffold44	210881	211005	125	GTAACTGCAGAAGATGTCCTA	CTAAGTTAACAACAATTATAAGACCAA
Chromosome 6	6Bin11	47.233	BVWS00954	SSR	(TA)14	scaffold44	364761	365011	251	AAAAAGGTGAAGACTGTTTGCC	GAGACTGTAATGCCCAGGCT
Chromosome 6	6Bin11	47.233	BVWS01790	SSR	(CTT)5	scaffold44	705028	705297	270	CGCCCGATACACTTGATACA	CAATCCATGACTGGATGTGC
Chromosome 6	6Bin11	47.233	BVWS00944	SSR	(ATT)11	scaffold78	238476	238737	262	TTCGAGATTTCACGCAAAAA	CCCCAGATAAATCTAGTGCCA
Chromosome 6	6Bin11	47.233	BVWS00544	SSR	(AAAG)5	scaffold78	370947	371228	282	GGAAAACGTCAAGAAAAAGCA	AAAGGCGTGCAAAAGAAGAA
Chromosome 6	6Bin11	47.233	BVWI00107	InDel		scaffold78	566102	566233	132	GGAAGTTGTGTTTGAATTACCG	ATGAGGGCGATGAAGTGTTT
Chromosome 6	6Bin11	47.233	BVWI00031	InDel		scaffold137	64053	64177	125	GGATAAACATCTTGACCAAAAACA	ATTTTACACAATGCTTATAGTTTCAT
Chromosome 6	6Bin11	47.233	BVWV00035	SV		scaffold137	74773	75253	481	ATAAGAGCACTCTCAAGGCT	AGGAATGTTAGAGGTGGGATAA
Chromosome 6	6Bin11	47.233	BVWV00012	SV		scaffold199	94459	95449	991	GGTCTTTGATTTCAATTCATCCG	GCATTTCTCCTTTTGATGGTCT
Chromosome 6	6Bin11	47.233	BVWV00013	SV		scaffold199	289055	289674	620	ACATGCAAATTCAGCTTGGG	CTAGCTGTAGGTATCCTGCT
Chromosome 6	6Bin11	47.233	BVWS00818	SSR	(CT)17	scaffold222	116303	116469	167	CAACCGGTCTTCGTGAATTT	CGGCCACCACTTCTCATATT
Chromosome 6	6Bin11	47.233	BVWV00048	SV		scaffold396	144007	144611	605	AAGAAAATCGGGAGTGAGGA	GTTTAAACCACGTTTCAGTGG
Chromosome 6	6Bin11	47.233	BVWS00647	SSR	(TTA)5	scaffold396	344384	344622	239	GGTCATCTTTTGGTGCTCGT	GGAGTTTAAGTGGATTCAAACACAT
Chromosome 6	6Bin11	47.233	BVWI00020	InDel		scaffold676	34466	34579	114	AATTTTCTTTTTCTTCGATTCCTTAC	TAGCTTGTTTGGCTCTTCCA
Chromosome 6	6Bin11	47.233	BVWS00683	SSR	(CA)8	scaffold676	234976	235215	240	TGCACTCCCACAGAAAATCA	GCTCGCATCGTCTTTCTTTC
Chromosome 6	6Bin11	47.233	BVWS00287	SSR	(TAAT)5	scaffold980	58499	58653	155	TTTAGCATTACAGGTAGACTTTGTAGCA	ATGTAACAATTTTGGTCCATGTATTTT
Chromosome 6	6Bin11	47.233	BVWS01776	SSR	(TTTA)8	scaffold33	2984114	2984324	211	TCAGATTACCACGAACCAACA	TCAATTGACATTTCTGATTTAAGGA
Chromosome 6	6Bin12	48.477	BVWS00133	SSR	(AC)11	scaffold33	2201953	2202106	154	GCATGAAATGAAAGGTGTTTGAAG	CTTTTTCCTCTAAATCATTCGCCA
Chromosome 6	6Bin13	49.55	BVWS00119	SSR	(AT)10	scaffold33	2110438	2110606	169	TCAATCAATGAAGAATTGGAGAGAAA	CATCCAATGACCATTTTTAAACCA
Chromosome 6	6Bin14	50.02	BVWS00759	SSR	(GA)13gg(GA)16gg(GA)15gg(GA)13	scaffold33	1564286	1564473	188	ATAACACAGGCGAACGGAAG	TTTTCAACCACAAATTGCCA
Chromosome 6	6Bin14	50.02	BVWS01960	SSR	(AT)6	scaffold33	1479792	1479899	108	ATTCCCCTCCAAAACAAAGG	GCAATTGCAAATCTGAGGGT
Chromosome 6	6Bin14	50.02	BVWS01309	SSR	(CT)13	scaffold33	1216851	1217060	210	TCCTCCTCCAAAGTCCTGAA	GGTGATTGTAAGTTGGGCGT
Chromosome 6	6Bin15	52.105	BVWS02289	SSR	(GGC)4	scaffold33	714299	714609	311	ACACCCAAAATCTTCCCATC	CTAAACCCCGCCTTCCTC
Chromosome 6	6Bin15	52.105	BVWS02391	SSR	(TC)9	scaffold33	530868	530975	108	GAACTGCATCCTTCCTGAGC	CACAGCTTTATTGAACCGCA
Chromosome 6	6Bin15	52.105	BVWS02410	SSR	(AAG)5	scaffold260	482955	483129	175	ATACTCCCGCAGCCATACAC	AAATCTATTGCCACAGTCATCTC
Chromosome 6	6Bin16	59.055	BVWS02267	SSR	(AT)3	scaffold260	1066744	1066940	197	TCCCAGATGGAAATGAAG	AACACGAAAGTCCCAAGA
Chromosome 6	6Bin16	59.055	BVWS02266	SSR	(AC)3	scaffold260	1087440	1087879	440	TGCAATAGCACCCATTAA	CCATACTATCAGGCATCTTTA
Chromosome 6	6Bin16	59.055	BVWS01431	SSR	(AT)9	scaffold260	1347438	1347602	165	CAAGTGACCCCCTCGACTTA	GGAAACGCAGCGGTTACTTA
Chromosome 6	6Bin17	60.868	BVWS02238	SSR	(GA)3gcaccagtctcaacgtagttgttcagctcatcctcg(TA)4	scaffold260	1692008	1692244	237	CCTTCCGTATTGTTCTTTGG	TCCTTTGTTGGACCTTCACG
Chromosome 6	6Bin17	60.868	BVWS02241	SSR	(GA)3gcaccagtctcaacgtagttgttcagctcatcctcg(TA)4	scaffold260	1692008	1692416	409	AACTGGATTGGCTCCTTTCA	TCCTTTGTTGGACCTTCACG
Chromosome 6	6Bin17	60.868	BVWS00266	SSR	(AT)10	scaffold260	1829989	1830122	134	TTCGCCACACATTCTCTAAGATCA	ACCCAAGTAATTCCAAAATTCAAATG
Chromosome 6	6Bin17	60.868	BVWS00340	SSR	(AT)11	scaffold260	2458710	2458851	142	CGCTAGTTTGATGAAAGTTTAGGGA	GTGAGGAATTTTCACCACCCTTTA
Chromosome 6	6Bin17	60.868	BVWS00233	SSR	(AG)26	scaffold260	2535739	2535901	163	AAACCATGATTTTACAGGGGATCA	TTTCTGTCTTCTTTTGACCAATGC
Chromosome 6	6Bin18	63.33	BVWS02488	SSR	(TA)6	scaffold260	3830552	3830682	131	GATGGGGATAGTGACAGTGGA	AGCCAACAACATTGGTCACA
Chromosome 6	6Bin18	63.33	BVWS02418	SSR	(AG)6	scaffold260	4307285	4307455	171	GCATGAAGTGGAGACAAGCA	AGGATGGCTAGCAGATTCCA
Chromosome 6	6Bin18	63.33	BVWS02298	SSR	(TGA)7	scaffold260	4670757	4671101	345	AACTTCTTTCCTCCCAGAT	AACACCATTAGCCACTCC
Chromosome 6	6Bin18	63.33	BVWS02433	SSR	(CA)8ctcatgtatgtcataataatgccttaattcctatacc(TA)9	scaffold260	5954255	5954442	188	ATTTCTGGCCCCAGTGTAAG	GAACAACGCAACCACGTATG
Chromosome 6	6Bin18	63.33	BVWS02451	SSR	(TTC)6	scaffold260	5990419	5990670	252	TAACCGTCACCAACCCATTC	TCCAAAATTGGTCGGATTTG
Chromosome 6	6Bin18	63.33	BVWS02432	SSR	(TG)8	scaffold260	6000225	6000442	218	GCATAAACCACCTGTGAGTGG	ATGGCTTTGCGTTTCATTTC
Chromosome 7	7Bin1	0	BVWI00345	InDel		scaffold55	223728	223826	99	CCTGCTTGTCCTGCATTCAA	CAATGGGGTCGGTTGATGAC
Chromosome 7	7Bin2	0.568	BVWI00346	InDel		scaffold55	549902	550010	109	ACTCTATAACTATATCAAAGGTAGAAC	AGATGAGCCTTGATGAGTAG
Chromosome 7	7Bin3	2.398	BVWS00100	SSR	(TC)22	scaffold449	7935	8069	135	GTGCAAACTAACCTCTCCTTTTCTT	AAAGATGTTCTTGAGAACCACATGA
Chromosome 7	7Bin3	2.398	BVWI00106	InDel		scaffold449	267086	267233	148	ATGGTCTCTGATCCTAGTCA	CATACTGCCTTCCTCATAGTTA
Chromosome 7	7Bin3	2.398	BVWI00105	InDel		scaffold449	335318	335464	147	TTGTGGAGGGAAGCGATCTT	GCAGCAACAATAGCGTACAG
Chromosome 7	7Bin3	2.398	BVWS02245	SSR	(CT)3ttcacgtcgtaggagttttcatcctct(TCG)3	scaffold449	481527	481931	405	GAGCTTTTCCGATGTATTTT	GACTCTATGTTCCTTTCCCTTA
Chromosome 7	7Bin3	2.398	BVWS00426	SSR	(ATT)7	scaffold449	672331	672511	181	GACGTTGAGAGGCGATTAGG	TGCCAGAATGATGGAACAAC
Chromosome 7	7Bin4	3.289	BVWS02438	SSR	(GAA)7gagagaaaaggggaagaaaaagagagagaacacatggttgggtttaggttgagtttagtgtgaatatgtttatata(AT)13	scaffold266	1189311	1189524	214	GGAGTAGTGGTGGAGACATGG	TCCTTTCTCTTTCGCAAACTTC
Chromosome 7	7Bin5	3.898	BVWS00225	SSR	(TG)12	scaffold266	1317667	1317826	160	TGAATTTCAATGAGAAGTCTGTTTTCTA	GCATGATGAAACTGATTTGTTCCT
Chromosome 7	7Bin6	9.072	BVWS01377	SSR	(AAT)12	scaffold456	208933	209212	280	GACAAAATGGATCTACAATAGAAACG	GCTTTTTAGGCACGAAACCA
Chromosome 7	7Bin7	9.682	BVWS00358	SSR	(AG)20ataatacattttccaatattccttccatcgtcatga(AG)6	scaffold456	955352	955511	160	CATTTCCGTTTCCATTTTCTTCAC	AAGTAACATCAAGCAGTTCGCCAT
Chromosome 7	7Bin7	9.682	BVWS00433	SSR	(AGA)10agg(AGA)10	scaffold111	123660	124060	401	TCTTTTAAGTTTTGAGGGAGAGC	TTCCCAAGCTAGCCTTTTCA
Chromosome 7	7Bin8	12.759	BVWI00087	InDel		scaffold111	510816	510964	149	TTGAAAATTGACTTATTGCTCTCG	ATGTGAACTCTGCCCTGAAC
Chromosome 7	7Bin9	14.29	BVWS00434	SSR	(AAT)10	scaffold20	53472	53894	423	TTGATGCTATGAGAAGGGGG	TTCCTATACGACAAAATGAACCAA
Chromosome 7	7Bin10	17.49	BVWS00304	SSR	(AAT)8	scaffold274	334088	334326	239	TGACCTTTTTGTTGGGTAATTTTG	TTCCAATCCTATCCCCACTAAATCT
Chromosome 7	7Bin10	17.49	BVWS00324	SSR	(CTT)10ctg(CTC)5	scaffold274	503319	503426	108	TTGGCTTCTTTGTCTTTAGCGATT	AAGGATTTGAAGCTGATGATGGAG
Chromosome 7	7Bin11	20.827	BVWS01507	SSR	(AT)6	scaffold274	1066004	1066281	278	TGGATTTTGGGCCTTACTTG	TTTAATGCATTTGGAATAACTTTGA
Chromosome 7	7Bin12	21.846	BVWI00032	InDel		scaffold160	286817	286945	129	AGTTTTATTTTTATTTCGCCTTTATGT	AGTTCAACTTATGGAAATTAATAGGG
Chromosome 7	7Bin13	22.456	BVWI00218	InDel		scaffold160	515601	515750	150	TTTCCATCTACGTGACACCA	TGGTTCTGGTACAGTTTTGTTC
Chromosome 7	7Bin13	22.456	BVWI00034	InDel		scaffold160	558486	558605	120	TTTTTGTCGATACGTCGATAG	GGAACTTACAGCTACTCTAACA
Chromosome 7	7Bin14	23.514	BVWV00041	SV		scaffold342	90515	91512	998	GTCGGTACCAGAGTATGAAA	ATTCCACCCACCTTAGAAAC
Chromosome 7	7Bin15	24.08	BVWI00055	InDel		scaffold342	247413	247551	139	GCCTTTTCCTGCCTTCTTTG	AGACTAAGGCGACCAAGGTG
Chromosome 7	7Bin16	24.908	BVWS00345	SSR	(TTAT)5(TTA)10	scaffold30	39523	39673	151	CCTAGAACAAGAAGCCAAAATTGC	GACATTCTCTTTCTTGCTACCTCTGC
Chromosome 7	7Bin16	24.908	BVWV00026	SV		scaffold30	131856	132784	929	GGTCCACTATCTGGTCACAG	GCATCTGGTCGTGGAATAGT
Chromosome 7	7Bin16	24.908	BVWS00471	SSR	(AT)7	scaffold30	249808	249988	181	TTCTTTTGCTTTCTGTCGCA	AAAAACACTCACCTCCTACCAAA
Chromosome 7	7Bin16	24.908	BVWS02045	SSR	(GA)7	scaffold30	744023	744158	136	AGGAACGAGGCGAGTAGACA	CATTCTTCCTTCTTCCCCG
Chromosome 7	7Bin17	25.436	BVWV00040	SV		scaffold15	316562	317366	805	AAATCAAATTCACTGAGACGAA	AATTTGTCACCCATAACCGA
Chromosome 7	7Bin18	27.706	BVWI00048	InDel		scaffold15	194803	194914	112	GAGTAATTTTTCATAATACCCCATCA	TCATTTGGGGCATGTTTACC
Chromosome 7	7Bin18	27.706	BVWI00049	InDel		scaffold15	122498	122627	130	ACAATATAGATTAACTTGGTCTTGCT	TGGGCTGTCTTAGGTGAGTT
Chromosome 7	7Bin18	27.706	BVWS01005	SSR	(TCT)5	scaffold61	761551	761736	186	TGCTGGTTAACGTTGAGTGC	AGAGCTAGGACGAGGGGAAA
Chromosome 7	7Bin18	27.706	BVWS01103	SSR	(AAT)7	scaffold61	1012280	1012481	202	ATGGTTGCAAAAGGGTTCAC	GCAGAAAATTGGACCTAGCTT
Chromosome 7	7Bin18	27.706	BVWS01883	SSR	(TC)9	scaffold163	75020	75133	114	TGTCGATCGTTGGATGTTGT	AAAGGCGGTGACTGAAATTG
Chromosome 7	7Bin18	27.706	BVWI00123	InDel		scaffold163	208659	208808	150	AAAAACTGTATTGGAAAAAGCCT	AGTTTTGTGGGGAACAGGAT
Chromosome 7	7Bin18	27.706	BVWI00124	InDel		scaffold163	235033	235122	90	CCTTTCTCCAAAGATATCGAAGTT	GTTGACGCGAAAGATCAAAG
Chromosome 7	7Bin18	27.706	BVWS00803	SSR	(AT)7(AG)8	scaffold527	314419	314651	233	TCAAACCCTAAACGAGAAGAGAA	TGGAAATGAATGACTAACTTTTGG
Chromosome 7	7Bin18	27.706	BVWI00084	InDel		scaffold527	323966	324114	149	CATAAAACTTACCCTCTCTTTCC	CCGAACCATGTAAAGAGTTATC
Chromosome 7	7Bin18	27.706	BVWI00085	InDel		scaffold527	334074	334221	148	GTTTTTGCTTGCCCACATGA	GTTCTCTAAAAATTATTCCGCCAA
Chromosome 7	7Bin18	27.706	BVWS01859	SSR		scaffold552	226164	226372	209	ACAATGGAAACTCGACTGCT	TAGATTCGCAGAATCACCCT
Chromosome 7	7Bin19	29.349	BVWS01094	SSR	(TTTA)5	scaffold52	28531	28766	236	GAGAGAAATAGTGCACCCCG	CGCCTTGTGACAAACATGAC
Chromosome 7	7Bin19	29.349	BVWS01639	SSR	(AAAT)5	scaffold52	55863	56118	256	GCATTTAACTTGAAAGCAAACAAA	TTACCCCTTTTTCGAGGATG
Chromosome 7	7Bin19	29.349	BVWS00353	SSR	(TAAA)5	scaffold52	217190	217322	133	CAAATTGATGCATTTTGATTAGCG	AAAATGAAGTGGATGATGGCTCTC
Chromosome 7	7Bin19	29.349	BVWI00061	InDel		scaffold189	436075	436207	133	GTACGAGCCCTTGAATGGAA	CAGATGTTTGGTCCCTCATTAAA
Chromosome 7	7Bin19	29.349	BVWS00831	SSR	(CT)10	scaffold189	659055	659304	250	CCACGCTCAGCCTAGGAATA	TCAACAACATGCTCCTGAAAA
Chromosome 7	7Bin19	29.349	BVWI00224	InDel		scaffold189	671565	671699	135	ACAACTTAGGCAGTTGGCAT	AAATCAAATGGCTATGATCACCTA
Chromosome 7	7Bin19	29.349	BVWS01436	SSR	(AGAA)7	scaffold189	1226968	1227241	274	TTCTCTCAGAGCTAAGCAAGCA	TTTAGGGCATTCCCAACAAG
Chromosome 7	7Bin19	29.349	BVWI00132	InDel		scaffold189	1256545	1256690	146	AATTAGTAAATGATTGCTATGGAATG	GTCAGAAATATAAGGAAATTAAGCCT
Chromosome 7	7Bin19	29.349	BVWI00060	InDel		scaffold388	13681	13760	80	TATAAAACATGTATATGTGTAGAACGC	TGAACTTTAAGAAATGTTAAATAGACC
Chromosome 7	7Bin19	29.349	BVWI00169	InDel		scaffold505	200405	200527	123	CTTGGACTTCCACAGTGCAT	CCAAGATAAACGTTTGTGGTCTT
Chromosome 7	7Bin19	29.349	BVWS01701	SSR	(AAT)8	scaffold505	341039	341266	228	GTCTTTGATTGGGGCAAGAA	CGGAACAAGAAAGAATCCCA
Chromosome 7	7Bin19	29.349	BVWI00170	InDel		scaffold505	449780	449905	126	AACGCACGATAGTTAGAAGG	TGACTAATTAAACTACACTCAGACT
Chromosome 7	7Bin20	30.346	BVWI00351	InDel		scaffold693	320940	321057	118	ACTTCTTAAGCCATACAGTCTC	GTTTACTCTTAACGGAGGAATTG
Chromosome 7	7Bin21	32.229	BVWS01724	SSR	(TTTA)5	scaffold1216	78610	78813	204	AAAGGTGCGTTTGGTAGTTGA	TTGAACGGTGGAACAAAAAG
Chromosome 7	7Bin22	33.995	BVWS02236	SSR	(AAG)5	scaffold17	4235560	4235740	181	GAGGAAGGAGGCGGTGAAAG	ACAAGAACAGGAAGAGGAAA
Chromosome 7	7Bin22	33.995	BVWS01915	SSR	(TTC)5	scaffold17	4235547	4235680	134	TCTTCCTGATTTTGAACCCG	TGCAGAAATATGCACAAGAACA
Chromosome 7	7Bin22	33.995	BVWS00612	SSR	(AAT)5	scaffold17	3105008	3105156	149	CCCCAGTTGTCTCGACTCTC	TTGAAGATTGCACCCTTGATT
Chromosome 7	7Bin22	33.995	BVWS00611	SSR	(AAG)8	scaffold17	2769905	2770116	212	TCATCGACATACCCCAAACA	TCGTCTTTTGTGCTGCTGAC
Chromosome 7	7Bin22	33.995	BVWS01147	SSR	(TAA)8	scaffold17	2549550	2549679	130	CCAATTACCCCGAAACTGAA	CGTCAACCTCCCTAGTTCCA
Chromosome 7	7Bin23	42.087	BVWS01149	SSR	(AT)6	scaffold17	1547276	1547612	337	GGAGGCAACTGTTTCTGTGC	CGATTTTAAGCTATTGGTTTGG
Chromosome 7	7Bin24	47.687	BVWS02253	SSR	(GA)3gtgaatctgtcggttgaagttgcagaaacgaacggagagaaagagagcaagagggaaa(AC)3	scaffold17	784095	784223	129	GGGATTGCCCGGGGTCTTCT	TCGCAAGTTCGTTCAGGTCA
Chromosome 7	7Bin24	47.687	BVWS00371	SSR	(TA)13	scaffold17	414228	414380	153	GACTGTGAGTCAGGGAAACAAGGT	GAGACATTCTCCGGGTACTCGTT
Chromosome 7	7Bin25	51.792	BVWI00281	InDel		scaffold1180	286205	286321	117	TTATTTTCATATGTGACCTTCAATC	TGCATCACTCGTGAAATAAC
Chromosome 7	7Bin25	51.792	BVWI00185	InDel		scaffold1180	314845	314943	99	TCCATAGGGGCTTCAAAAAC	AGTTGTGGGATATTTCAGATTGT
Chromosome 7	7Bin25	51.792	BVWI00282	InDel		scaffold1180	375622	375729	108	TGCCTTACCACCTATATATTCTG	TGGTATTGTGAGGTACTCGT
Chromosome 7	7Bin26	55.678	BVWS02332	SSR	(AT)6	scaffold1180	424473	424758	286	AACACTTGATTGCGGACACG	AAGCCAACAAATAAATGAGC
Chromosome 7	7Bin27	60.034	BVWS02347	SSR	(CAA)5(TAA)6	scaffold87	733149	733293	145	GCCACCACACACAATCACTC	AATGTCACGTGAGGAGGAGG
Chromosome 7	7Bin28	60.635	BVWS02299	SSR	(TA)7	scaffold87	1215192	1215428	237	AAGACAATCCAATACCCTTTAC	AGCCTTCTTTGCCTTCAT
Chromosome 7	7Bin28	60.635	BVWS02453	SSR	(AG)11	scaffold87	1787793	1788092	300	CCAAATTGGACCAGAACCAC	AAGCCGTCAGTCTCGGTTAG
Chromosome 7	7Bin28	60.635	BVWS02324	SSR	(AT)7	scaffold150	560482	560735	254	TGCCAAGTCCCTCCCTGACC	AACTGTGACCCACTCTACAA
Chromosome 7	7Bin29	63.864	BVWI00247	InDel		scaffold75	39710	39859	150	TTATGGTTAGGAAGTGAGGTG	AGAGTTCATGCCTTTAGACC
Chromosome 7	7Bin29	63.864	BVWS02274	SSR	(TGA)3	scaffold75	101045	101260	216	ATAACTATCTACCAACGTCGCTAA	ACCAATTTCTGTGCCATTCA
Chromosome 7	7Bin29	63.864	BVWI00248	InDel		scaffold75	160995	161108	114	AGTTTATCCTCTGGTCGATAGTG	TTTATGAAACGCGGCAGACT
Chromosome 7	7Bin29	63.864	BVWS02235	SSR	(ATA)13	scaffold75	663473	663865	393	ATAACTTAGAATGGCAAT	ATCTTTTGAGTCCTTATA
Chromosome 7	7Bin30	64.565	BVWS02300	SSR	(GA)7	scaffold75	1967553	1967890	338	CTTCTTTAGCCGCCATTT	AACCCATCTACTCCATTCCT
Chromosome 7	7Bin30	64.565	BVWS00098	SSR	(TC)15	scaffold75	2286085	2286223	139	CAACAATTCAGCATGTAGCTGAGG	AACACAGTACCCTCCAAAAAGCTG
Chromosome 8	8Bin1	0	BVWS02273	SSR	(CA)3	scaffold98	1580637	1580972	336	AGATGCCTATCCATTCAC	TAGCCTTTCATATCCTTTCC
Chromosome 8	8Bin1	0	BVWS02341	SSR	(TA)6	scaffold98	1483863	1484084	222	CAATGCGAAAGTGCAACAGT	ATCTGCCAAGTCATTCAGCC
Chromosome 8	8Bin2	0.632	BVWS02402	SSR	(CCA)6	scaffold98	92325	92645	321	AAAGCCATGGCAGAAGAAGA	CTTGTGTTCATGGCTGTGCT
Chromosome 8	8Bin3	2.29	BVWS01983	SSR	(TCT)8	scaffold98	3212486	3212899	414	CCCTTTTCCCATTTTTGTTC	ACAATGAGGGCAACTTCAGC
Chromosome 8	8Bin3	2.29	BVWS02163	SSR	(AAG)8	scaffold98	3212486	3212770	285	CCTCTCCCCATCGATCTTCT	CCCTTTTCCCATTTTTGTTC
Chromosome 8	8Bin3	2.29	BVWS00738	SSR	(AG)11	scaffold98	2548343	2548584	242	GAATCCTTCACCAAAGGCAA	GGGTCACATTCCCAAAATTC
Chromosome 8	8Bin4	3.239	BVWS00991	SSR	(TC)7	scaffold98	2471145	2471261	117	TACATGCAGGCATGACCCTA	TTGAAAATGGATTTGATGTTGC
Chromosome 8	8Bin5	4.475	BVWS00992	SSR	(AT)13	scaffold98	2217315	2217514	200	CATGACGCTGCACTCATCTT	AACATTTGAACGTATGCGGA
Chromosome 8	8Bin5	4.475	BVWS00252	SSR	(AAAT)5	scaffold98	2001148	2001253	106	TTGAAGTGCCATTCACACTTTGAT	TACTCCATGTTTGTTGCTTGATGC
Chromosome 8	8Bin5	4.475	BVWS01447	SSR	(TA)9	scaffold16	265168	265429	262	ATCTTCGATTTTGAACCCCA	TTTCAAGTCAGAGTTCCGAAAA
Chromosome 8	8Bin6	5.065	BVWS00726	SSR	(AG)7	scaffold16	924158	924435	278	TGTCTGGCTGCTCATTTTTG	CTATGGAGCCAAAGGGTTCA
Chromosome 8	8Bin6	5.065	BVWS01402	SSR	(AATA)5	scaffold16	994619	994842	224	CTCCCCTCAAAAGAGACCCT	CCCCTGAGCTTTGATTTTCA
Chromosome 8	8Bin7	7.767	BVWS00826	SSR	(AT)10g(TA)6	scaffold12	651343	651539	197	ATGGTTCATTTTCACGTTCG	AAAAATCAAGCAAAGAACAACAT
Chromosome 8	8Bin7	7.767	BVWS02430	SSR	(AAT)5	scaffold12	2103232	2103456	225	TAAAATTGTGGGACGTGCTG	TTGGAAATGCCAAACGCT
Chromosome 8	8Bin7	7.767	BVWS00620	SSR	(TA)10	scaffold12	735313	735503	191	CCAGAGAGACATTGAGTCTATTGC	TGCCACAAAATGAGAAATTAACA
Chromosome 8	8Bin7	7.767	BVWS01397	SSR	(GAG)6	scaffold77	1284239	1284486	248	CCTCCACTACCCCTTCAACA	TGTTCTCCCTCCATCTCCAT
Chromosome 8	8Bin7	7.767	BVWS01209	SSR	(ATTT)5	scaffold77	726071	726332	262	GGGAAGGGGCGATAGAATAC	CTATCAAAGAGCGAGAGGCG
Chromosome 8	8Bin8	8.539	BVWS00610	SSR	(TA)13	scaffold77	489601	489863	263	CAACTCCCCTCCCAATACCT	GCCACCAGAGAAAAACTCCA
Chromosome 8	8Bin8	8.539	BVWS00609	SSR	(TTC)8(TTA)7	scaffold77	303665	303975	311	CCCAATCCCCCTTAACACTT	CGTGCAGGATCGACCTACTT
Chromosome 8	8Bin8	8.539	BVWS01589	SSR	(GA)6	scaffold77	1498872	1499130	259	TGACGTTTCACGGCTTTAATC	CCAAATTCTTCTGATTCGTTCA
Chromosome 8	8Bin8	8.539	BVWS00523	SSR	(TA)6	scaffold38	56564	56691	128	TCCTTGGCTATGTAATTTCCG	CATCATTTTGAACATTCATTCG
Chromosome 8	8Bin8	8.539	BVWS00522	SSR	(AG)14	scaffold38	189192	189466	275	GCAAAGCAATATCGGGAAAA	TTCCTTCGCCATTTTCATTC
Chromosome 8	8Bin8	8.539	BVWS01287	SSR	(AT)6	scaffold38	552988	553245	258	TGGAACAATCATGTGTCAGGA	GCCTTTTCCATATCCATTTCA
Chromosome 8	8Bin8	8.539	BVWS01292	SSR	(AAAT)5	scaffold38	803763	803978	216	CACCGACACTTGCTTGTCAT	CAGACCTTGGAGTTGAGGGA
Chromosome 8	8Bin8	8.539	BVWI00275	InDel		scaffold38	911638	911772	135	CAGCAATGAGTTGATGCCTT	AGGAGAATCAGTATGTGCAGTA
Chromosome 8	8Bin8	8.539	BVWS01491	SSR	(AT)11	scaffold125	174148	174397	250	CATTTATTCGTTCGAAGGTTCA	AGCCAAATGGAGAACTGACG
Chromosome 8	8Bin8	8.539	BVWS00528	SSR	(TC)13	scaffold210	343555	343792	238	GCACACACATTTCACCGACT	CGAACCGAGGTGGAAAGATA
Chromosome 8	8Bin8	8.539	BVWI00101	InDel		scaffold217	164025	164135	111	GCTCTCTAGTGTGTGATTAGG	GTTGCACTTTAATGACGCTT
Chromosome 8	8Bin8	8.539	BVWI00041	InDel		scaffold217	330995	331141	147	GCTTAATTTGAGACCATTCCTAGAT	TTCTTTTCCTGGTGATGCATTT
Chromosome 8	8Bin8	8.539	BVWS00037	SSR	(AT)14	scaffold217	679539	679673	135	TCTCCATACCGATCAAATACAGGA	AGAATTGATGTTGATGATGCAGAA
Chromosome 8	8Bin9	9.148	BVWI00327	InDel		scaffold217	802213	802361	149	AATAGAAATTTAATGAACAAATTCCAC	TCGTCAATTCTAGGAAGAGG
Chromosome 8	8Bin9	9.148	BVWI00325	InDel		scaffold217	879944	880076	133	AACTCAACTGAACACGCAAA	ACTGAAAGACAGGTTTGAGG
Chromosome 8	8Bin9	9.148	BVWS01001	SSR	(AT)7	scaffold432	34980	35221	242	TGGTTTGTTGGATTTTGTGAA	ATATTATCCCAGCAGCCACG
Chromosome 8	8Bin9	9.148	BVWI00164	InDel		scaffold437	369070	369218	149	TTTTTGGTGAAAGGTGATGAG	TGAGAATATGCCTCCATACAG
Chromosome 8	8Bin9	9.148	BVWS01461	SSR	(GGTGGA)5	scaffold437	543257	543534	278	CTGCTGGAACTATCATCGCA	TGCAGATGGCTTTGTTTGTC
Chromosome 8	8Bin9	9.148	BVWS00886	SSR	(TTA)10	scaffold469	267985	268220	236	CACCGTATTTGGTTCGGTCT	AATGGGAAAGGGGAAAAATG
Chromosome 8	8Bin9	9.148	BVWI00172	InDel		scaffold496	246638	246752	115	AAATATTAGTCGCACTTCGC	AGATTCGGTTTCCTACAACA
Chromosome 8	8Bin9	9.148	BVWS01714	SSR	(TAA)6	scaffold496	263394	263494	101	TTCATCCCTTCCCAGAAAAA	GCTCCATTGTGGGATGAAGT
Chromosome 8	8Bin9	9.148	BVWI00171	InDel		scaffold13133	1275	1422	148	TGATTATTCACAAGCCATTTGTA	TCTCATTGGTCAGAGAGAGATA
Chromosome 8	8Bin10	11.065	BVWS00527	SSR	(TA)7	scaffold62	447337	447615	279	TTACCGACTGTCGTCCATCA	GTTCCCTCGAATAGGGGTGT
Chromosome 8	8Bin10	11.065	BVWS01698	SSR	(AAATAA)5	scaffold62	751427	751654	228	GGCATGAGTTTCAAAATCCC	CACCTATGCCACATTGTGCT
Chromosome 8	8Bin11	13.888	BVWS00373	SSR	(AG)23	scaffold83	3023709	3023872	164	AAGTGCCACTCGAAGCAACATAAC	CGCCATTTTTCTTTTTCTTCTCAA
Chromosome 8	8Bin11	13.888	BVWS00213	SSR	(CT)18	scaffold83	3520787	3520945	159	AGCGAGTTCACCTCTACATCGTTT	CCAACGAAACAGGGAATGCTATTA
Chromosome 8	8Bin12	16.352	BVWS02009	SSR	(TCT)9	scaffold83	3533460	3533734	275	TGGAATCAGAAGATGGAGGG	GCCTTGCAGAGAGAACCAAG
Chromosome 8	8Bin13	22.319	BVWS00374	SSR	(TC)20	scaffold83	2527658	2527818	161	ATTTGTGAAGAACTGGAAAGGCAC	AGAGCAGAGAAAATGGGGAAAAGT
Chromosome 8	8Bin13	22.319	BVWS01956	SSR	(TG)6	scaffold83	2419351	2419579	229	AGGAGCGAAGAAGGGAAAAG	AAACCACGTGAGGGTACACA
Chromosome 8	8Bin13	22.319	BVWS00005	SSR	(TA)11	scaffold83	2126067	2126209	143	CCAATACCAAAAGGATTCCATCAA	TGTTGCAAATCAATTGTTACTTGTACG
Chromosome 8	8Bin13	22.319	BVWS02361	SSR	(TTC)8	scaffold83	557100	557300	201	GCCACCTGGTTTCTTCTCTG	GAAAAAGCGTTTGGTGAGGA
Chromosome 8	8Bin13	22.319	BVWS02406	SSR	(GA)9	scaffold83	763805	764042	238	TGAATTGCAGCACAGTCCTC	GGATGGGAGTAGAGCCCATT
Chromosome 8	8Bin13	22.319	BVWI00283	InDel		scaffold83	6389	6533	145	TGGGTTGGGTCAACTTACATT	CCAAACATAGCCCACCTGTT
Chromosome 8	8Bin13	22.319	BVWI00284	InDel		scaffold83	64488	64599	112	GATCGAACAGAGGCTGCAAG	GAGCTTCCGAGAGTGTCAGG
Chromosome 8	8Bin13	22.319	BVWS00265	SSR	(AAG)7	scaffold349	564150	564290	141	AAACTTGTATGGAAAAGGGAAGGG	AGTGGAGTGGCAATCATTAGAATTAAA
Chromosome 8	8Bin13	22.319	BVWS00329	SSR	(TTA)11	scaffold349	575326	575490	165	TATAAGAAGGAACACACCAACGCA	CAAAAGAAAGGCGAGTAAAAGCAA
Chromosome 8	8Bin14	27.63	BVWS00369	SSR	(AG)19	scaffold349	1701975	1702105	131	TGAGAAAATGGAAGATGCAAATGA	TTCTTCTCACTCTCTCCTAAGATTTTGC
Chromosome 8	8Bin14	27.63	BVWS00050	SSR	(CAAAA)4	scaffold349	3055131	3055246	116	CGGGAATTTACGAGAAGAAAGGAA	ACCCGAACACTTGTAGAATCCAAA
Chromosome 8	8Bin14	27.63	BVWS00049	SSR	(AAATC)4	scaffold349	3059476	3059560	85	TCTCAATTTATCTTTGCGACCAAAA	TGGTTGTTAAGCATGTGATTGGAT
Chromosome 8	8Bin14	27.63	BVWS02272	SSR		scaffold349	4901404	4901572	169	TTTCATTTCAATGGGGAACA	TAGCCAGGTCAGGTGTCG
Chromosome 8	8Bin14	27.63	BVWS00193	SSR	(AT)12	scaffold349	5238041	5238251	211	CAATGGTGCTCAATTCAACAAA	ATACAAAACGTCACTTCACCCAAA
Chromosome 8	8Bin15	29.231	BVWS02373	SSR	(TC)14	scaffold349	5404095	5404213	119	CTTAAAGTGCCGTTGACCGT	TGCATAAAAAGAAGAAAACACCA
Chromosome 8	8Bin15	29.231	BVWS02470	SSR	(TA)3	scaffold349	6701692	6701823	132	GCAACCATTCTTTACTGTGCC	AGGGCATTTCAAGACAAACC
Chromosome 8	8Bin15	29.231	BVWS02239	SSR	(CTC)3	scaffold349	7585409	7585716	308	TTTCTGATTTGGGTCACTCT	ATATCCACCATTCCTTCCTA
Chromosome 8	8Bin15	29.231	BVWS00118	SSR	(TG)20	scaffold349	7655494	7655645	152	CATTGCAGGACCTTCCTTCTTCTA	CTCTGACTTGTCCATCCCTCTCTC
Chromosome 8	8Bin15	29.231	BVWS02319	SSR	(TAT)5	scaffold349	8016284	8016590	307	GGCGGAGATGGATCAGGAGG	CACGAGTGTTGGGTGGCAGA
Chromosome 9	9Bin1	0	BVWS02066	SSR	(GAG)8	scaffold292	4419443	4419577	135	TCACGTGAAGTTGAAATGGG	AAAAGTGGTGGGTGCAGAAG
Chromosome 9	9Bin1	0	BVWS01947	SSR	(GAT)9	scaffold292	3849924	3850120	197	GCTTGTGGAGAAGAACAGGG	GCCCTGCAGCTTACAGAAAC
Chromosome 9	9Bin2	2.318	BVWS02280	SSR	(CTC)3	scaffold292	3931160	3931453	294	TGTTCCCTCCAAATGTCC	CAGCAAGCGTTTCGTCCC
Chromosome 9	9Bin2	2.318	BVWS02327	SSR	(GGA)6	scaffold292	3377674	3377971	298	ACACGACGCAGCAGCCTTAT	TGCCACGGACTCCCACCATT
Chromosome 9	9Bin3	6.784	BVWS02389	SSR	(GCA)9	scaffold292	2658078	2658230	153	TACCGGTGATTCCATTAGGC	TTAATTTCTCCCGTGGGTTG
Chromosome 9	9Bin3	6.784	BVWS02307	SSR	(GCA)9	scaffold292	2657988	2658218	231	CGGTAGTAGAGGAAGGAGGA	GTGGGTTGATTGATGTTGTT
Chromosome 9	9Bin3	6.784	BVWS00200	SSR	(TC)16	scaffold292	2578302	2578466	165	GTTCGTCTTCAATATGCTTTGCCT	TCATGAAGTTTCCATCTCTCTTGATTT
Chromosome 9	9Bin4	9.181	BVWS02377	SSR	(AC)6	scaffold292	2279863	2280017	155	CTGAGGTTCAATCCCGCATA	CTCCAATCCCAAGTCCTTCA
Chromosome 9	9Bin5	11.102	BVWS02387	SSR	(AG)11aagctttatcatcagttaaacatctcaag(AGAAAA)5agccactaaaaatataattaataatcacaagaaatgc(AT)8	scaffold292	1977013	1977281	269	TACTTCTTCTACGGCGGTCC	TCATCAGCTGTGTTTCTAAGGC
Chromosome 9	9Bin5	11.102	BVWS02411	SSR	(ATA)7	scaffold292	1372914	1373105	192	CTTCCTGCACTTTTCAAGCC	CAGCAAATACAGATCGCTAACAA
Chromosome 9	9Bin6	14.14	BVWS00309	SSR	(GA)18	scaffold292	1305460	1305607	148	GCTCCCCTTTTATTCAATTTTCCT	AAACCAGATCCAGATTTTTCTCTTG
Chromosome 9	9Bin6	14.14	BVWS00177	SSR	(AC)31(ATGT)5	scaffold292	692847	693040	194	TTCAACCAAGCAGTTCTTAACACAA	GATGCATTAAGATTTTCGTTTCGC
Chromosome 9	9Bin6	14.14	BVWI00246	InDel		scaffold292	382713	382832	120	TGATTGATTCTTTTGTACGGTGA	TGAATCCCACAATAGGGACAA
Chromosome 9	9Bin6	14.14	BVWI00245	InDel		scaffold292	364723	364867	145	AGTAATGTACTACTGAGCCAAA	ATATAAATACATCATGAATGTCACAC
Chromosome 9	9Bin7	15.528	BVWS02326	SSR	(TA)5	scaffold109	1223777	1224000	224	TAAGGCATTGAATCAAGGAA	TAGGGAATACAATACAAGCA
Chromosome 9	9Bin8	19.66	BVWS02121	SSR	(TG)6	scaffold109	752210	752441	232	AAGCTTTGGGAGTTGCTTGA	CATTCCCTCCAAATCGATGA
Chromosome 9	9Bin9	28.729	BVWS01133	SSR	(AAT)6	scaffold109	4291759	4292018	260	CATCCACCTCAAACTTTAGAAACA	TTCTATTCCCGTCATTTCATTG
Chromosome 9	9Bin10	35.345	BVWS00212	SSR	(TAATT)4	scaffold28	3408430	3408544	115	ATCTACCACCTTTTGGGATGTTGA	TCAAATAAATGCCCATGTTATGGTT
Chromosome 9	9Bin11	35.804	BVWS00567	SSR	(ATT)5	scaffold28	2836409	2836587	179	GCGCTTCAAAAACCCTTAGA	TGCACGTATGTACGCAAAAA
Chromosome 9	9Bin12	41.316	BVWS00019	SSR	(TTATT)4	scaffold28	1363276	1363515	240	TCATTTCGGTCTTTTGTATTTGAAG	TGTAACGACTTTTAAGCAATCTCAAAC
Chromosome 9	9Bin12	41.316	BVWS02412	SSR	(TA)8	scaffold28	1237564	1237756	193	GGACCGTTGTCGTTGAGAAT	GCCCAGTGGGGAGATTTATT
Chromosome 9	9Bin12	41.316	BVWI00095	InDel		scaffold615	180810	180943	134	GCAAAACCTTGAAGATACTCGT	GACTCAGTAAAGTCCATTCACG
Chromosome 9	9Bin12	41.316	BVWS00635	SSR	(TAA)9	scaffold615	173240	173406	167	CCAGAGTCCAAGAAACTCAAAA	CGGAAAATAGCATTTGGGTG
Chromosome 9	9Bin12	41.316	BVWS02237	SSR	(TCT)5	scaffold126	150209	150801	593	AAAGCAAAATTACGATACAACTC	ATGTGAAGCATTCGCTGACC
Chromosome 9	9Bin12	41.316	BVWI00029	InDel		scaffold126	505466	505596	131	TGGTTTATATTGGTCTTAGTGGATT	TGATCGAAATAAACTGCTGCT
Chromosome 9	9Bin12	41.316	BVWI00147	InDel		scaffold230	22556	22703	148	AAGAACACACCCAACTTATACAAAAC	GTTTTTGCACTGTGGTGGCA
Chromosome 9	9Bin12	41.316	BVWS00969	SSR	(AT)8	scaffold230	141242	141415	174	TCCTAAGTTCTCATTTGGAGGA	CGAATTTCAATTTTATTTCCATCA
Chromosome 9	9Bin12	41.316	BVWS00483	SSR	(AT)8	scaffold230	235532	235796	265	GATGTGACCCCCATGGAATA	ACCGTGTCCCCTCTTTTTCT
Chromosome 9	9Bin12	41.316	BVWI00148	InDel		scaffold230	431986	432131	146	CCGCATGGATGCATCAACAT	TGCACCGCTTGTATGCTTTA
Chromosome 9	9Bin12	41.316	BVWV00020	SV		scaffold413	156843	157345	503	ACACAAACAAAATCGTAAAACAG	AAAAACAGTCATCTTTCATAGCA
Chromosome 9	9Bin13	41.939	BVWI00352	InDel		scaffold73	222669	222817	149	ACTTTTTCTGTCCAGTACTCA	CTTCCTGCTTCACACATAAC
Chromosome 9	9Bin14	44.426	BVWS01523	SSR	(AGG)5	scaffold5	126384	126581	198	CTGCCCAAAACAGGAACATT	GGTGTGGCGGAGTATTTGAT
Chromosome 9	9Bin14	44.426	BVWS00959	SSR	(AT)7	scaffold5	224383	224662	280	GAGGATAAAAGCGCATTCACA	TGCATGTATGTGGGCAATTT
Chromosome 9	9Bin15	45.029	BVWS02288	SSR	(AGC)3	scaffold7	145118	145767	650	TTGAAGGTGGCAAAGGTC	GGCAATCCAGGATCAGCA
Chromosome 9	9Bin15	45.029	BVWS01314	SSR	(AT)6	scaffold7	352057	352209	153	CCAATCCCCCTCTTTTGTTT	TTGCTTCAATGCTCTTTTGC
Chromosome 9	9Bin16	45.49	BVWI00271	InDel		scaffold7	1760964	1761071	108	CAAACGGGGCTTGAATTACT	CTGTTTTGGATGGGAATCAGG
Chromosome 9	9Bin16	45.49	BVWS00926	SSR	(AAAAT)5	scaffold7	2024326	2024583	258	CCTTCCTCATTGCAATCTCC	AAATATTTTCTCTTCTCTTCCATTTTT
Chromosome 9	9Bin16	45.49	BVWS02415	SSR	(AT)12	scaffold7	2230539	2230794	256	TGTTTGGAACGTTTGCTCAG	AAAACACAAAATATAGGGACTAAAACG
Chromosome 9	9Bin16	45.49	BVWS00333	SSR	(CT)20	scaffold7	2309506	2309633	128	TGTTGAGATTCTTTGATTTCAACTGT	TGGGTCAAAGTATTTTTGCTTTTT
Chromosome 9	9Bin16	45.49	BVWI00272	InDel		scaffold7	2938348	2938450	103	ATGATAGACCACACCTGGGA	TGGAATTGGGAAGGCTCCAT
Chromosome 9	9Bin16	45.49	BVWS00553	SSR	(TA)8	scaffold7	3153655	3153877	223	TGAACGAAGAGAGGGCAGTT	TGGAATTTGATTTGCTGGGT
Chromosome 9	9Bin16	45.49	BVWI00093	InDel		scaffold48	122987	123116	130	CATGTGTTGAGAGAGTGGATT	TGAGAACTGACGTAGAAATGA
Chromosome 9	9Bin16	45.49	BVWS01838	SSR	(GA)16	scaffold48	287445	287602	158	AAGGTTGATGGAGCTGGCTA	GCCCCTCCCTTCTTTCCTAT
Chromosome 9	9Bin16	45.49	BVWI00094	InDel		scaffold48	304403	304552	150	TTTTCCCTCTGATTAACTTGAC	TGAAATGAGCTGAGAAGACA
Chromosome 9	9Bin16	45.49	BVWS01722	SSR	(AG)6	scaffold79	224658	224912	255	GAATAGTGGCGCTTCCAAAA	GGGGAATGGGTGAGGTAGTT
Chromosome 9	9Bin16	45.49	BVWS01256	SSR	(TC)16(AC)16	scaffold79	261412	261641	230	ACGCCACCTTAGTGGAATTG	CTCGCACTCCACCTACAACA
Chromosome 9	9Bin16	45.49	BVWS00539	SSR	(TA)7(TATT)5	scaffold79	282184	282441	258	GTTTTGGGGAGGAAAAGGAA	GCTGGGGAAGACGAATTGTA
Chromosome 9	9Bin16	45.49	BVWS02452	SSR	(GA)8	scaffold79	482405	482675	271	CGTCATTTGAGAGCATTGGA	TCCAATTTTGTTTAGTGACATAGAGTGC
Chromosome 9	9Bin17	46.29	BVWS01512	SSR	(TA)8	scaffold79	1175578	1175840	263	CGATAGGCAACGACTGATGA	TGTTGGAGTGGAATTGGTTT
Chromosome 9	9Bin17	46.29	BVWS00508	SSR	(TA)11	scaffold79	1273859	1274085	227	GCTGAGTGAGGATCTAATCGG	GCAAATGATTGAAACCCAAA
Chromosome 9	9Bin17	46.29	BVWS00507	SSR	(TAAT)6	scaffold79	1386375	1386574	200	TTGATCTTTTAGCCCTTGGC	ATTCCAAAGCTCCACGTGTC
Chromosome 9	9Bin17	46.29	BVWS01387	SSR	(TA)7	scaffold79	1487798	1487954	157	CCGTTTTCTACCCAAATGAA	TGGCTAAGAGGTATATGGTTCAAA
Chromosome 9	9Bin17	46.29	BVWS00593	SSR	(AT)6	scaffold192	76853	77048	196	ACGCTTGACAAGGGAGCATA	AAATTGGGAAGATTGTTGCG
Chromosome 9	9Bin17	46.29	BVWS00688	SSR	(TA)6	scaffold192	337139	337393	255	CGATCCAAATGGACTCTGAAA	ATATTTCATGGCTGGGTTGG
Chromosome 9	9Bin17	46.29	BVWV00024	SV		scaffold192	569026	569960	935	GAAACGCTAACCACGTGAAA	CAACAGGCAAACATAAGTCG
Chromosome 9	9Bin17	46.29	BVWV00022	SV		scaffold192	588451	589109	659	TGGATACAGGTGATGTCGAT	TAACCGAAAACCAACGTCAG
Chromosome 9	9Bin17	46.29	BVWI00145	InDel		scaffold240	116012	116155	144	CCATATTTAGGGGTGGGCTT	CCTATGCACTAGGTTACTCCTC
Chromosome 9	9Bin17	46.29	BVWS00016	SSR	(GGAGA)6	scaffold240	200563	200692	130	AGCCTCTCCTTCAACTTTCTCGTT	CGGTTGGGATCTTTAGAAAGAAGG
Chromosome 9	9Bin17	46.29	BVWI00146	InDel		scaffold240	543044	543140	97	AATGATAAAACTAAAACCGCTAAAA	CTTTCTTCCTCTTTTCAAATACAC
Chromosome 9	9Bin17	46.29	BVWS00851	SSR	(AAAG)5	scaffold252	876663	876847	185	TGTCACTTGAAGCATGGGAG	TTTGGGCCTTTACATCTTGG
Chromosome 9	9Bin18	47.49	BVWS01731	SSR	(TA)12	scaffold252	461875	462084	210	CGCCCACCACTACTCAATCT	TGGGGTAGCTTTGGATGAAC
Chromosome 9	9Bin18	47.49	BVWS01887	SSR	(AGA)9	scaffold433	168378	168656	279	AAGATGCTGACGAAGCCAAT	ATGGACACGCTTTTTCTGCT
Chromosome 9	9Bin18	47.49	BVWS00884	SSR	(TAAT)6	scaffold433	361909	362183	275	TCACACATCACCGTGTTTCA	GGAATGCACGTTGGAAGAAT
Chromosome 9	9Bin18	47.49	BVWS00883	SSR	(CT)7	scaffold433	429198	429470	273	CAGGGTCTGTTTGGGTCATT	CCGATCTCAAGATAAGCCCA
Chromosome 9	9Bin18	47.49	BVWS00861	SSR	(TA)14	scaffold580	14094	14439	346	GTTTGCACATGACGGAGAAA	CCATCTAGCCTCTCCACTGC
Chromosome 9	9Bin18	47.49	BVWI00173	InDel		scaffold580	332734	332870	137	GAGTTACATTGGTGAGATTTCTAGGG	GAGTTGGCCCCCAATGTAGG
Chromosome 9	9Bin18	47.49	BVWI00174	InDel		scaffold580	518258	518349	92	GTTCTTAGCGTCGTGTAGTG	TCAATGTGGAACCCTAATGGA
Chromosome 9	9Bin19	53.919	BVWS02338	SSR	(AG)7	scaffold121	1090514	1090757	244	TGTGGGCAAAATACACTTCAA	GGGAAGGAGAAATGAAAAACAA
Chromosome 9	9Bin19	53.919	BVWS00001	SSR	(GA)11	scaffold121	1277638	1277787	150	AGAACCTCCATTACCACAAACTAATGA	TCCGATCCAATGCTTTATCTTCTC
Chromosome 9	9Bin19	53.919	BVWS02322	SSR	(ATT)8	scaffold121	1529969	1530212	244	GATTGCTCTTCATCACCCTC	TTCAAGTCAAACTCATTCCA
Chromosome 9	9Bin19	53.919	BVWS02392	SSR	(GCCATA)4	scaffold121	2217321	2217476	156	CACAGAGATACAGTGCAGACCA	TGACATGCACTGACCACAAA
Chromosome 9	9Bin20	57.828	BVWS00068	SSR	(AT)11	scaffold121	1878108	1878315	208	AGTGTTTCGTGTTTCAATCACCTT	GTTTAACCAACGCAACAAACAGAG
Chromosome 9	9Bin21	64.293	BVWS00030	SSR	(TC)13	scaffold121	2472647	2472747	101	ATTTCGCCGAGTACACTGAAAATC	GTGAAAATCCACGAAGCTAACCAC
Chromosome 9	9Bin22	67.838	BVWI00077	InDel		scaffold641	211476	211625	150	AGGACATCTGTGCTCAACTA	TTGTTGGGGGTTATCGTACA
Chromosome 9	9Bin23	73.851	BVWS01160	SSR	(TA)6	scaffold641	531599	531848	250	AAATGTGCATGCTAGGTCCC	GGGTGTTACAATTGAGCCTTG
Chromosome 9	9Bin23	73.851	BVWI00078	InDel		scaffold641	911630	911734	105	GTGCACCACCCAGAAGTATC	ACTATTTGGCAGTGCGTGAC
Chromosome 9	9Bin23	73.851	BVWS01161	SSR	(AAT)6	scaffold641	1045521	1045670	150	ACCGCTACAAAGCGTTGACT	ACGACACCGTGTAGGACACA
Chromosome 9	9Bin23	73.851	BVWI00079	InDel		scaffold641	1088245	1088369	125	AGAGTCGGACAAACTACGTG	ATAGAGCTGACTCCCACAGA
Chromosome 9	9Bin23	73.851	BVWS00090	SSR	(TC)20	scaffold641	1142087	1142213	127	ATTCTTCCTTTTGGAACCCACATT	AGGCCTTCACGCAGTCTACATATC
Chromosome 9	9Bin24	75.482	BVWS02374	SSR	(TA)7	scaffold805	7330	7481	152	CCCTCAGTGATGGTGATGAA	CTTCCCTTTCCCTTGCATTT
Chromosome 9	9Bin24	75.482	BVWS02323	SSR	(TA)8	scaffold805	7853	8148	296	AGTGACTCGTCATCCTCCTC	CTCTTTTATGTTTTATCCTTCCA
Chromosome 9	9Bin25	76.916	BVWS00134	SSR	(CT)11	scaffold805	162787	162944	158	GGGTTTGTACCTCAAATGCACTG	CCATCATAGCACAAAGACAATCACA
Chromosome 9	9Bin25	76.916	BVWI00080	InDel		scaffold805	176989	177137	149	AGTCGTGGACAAGACATGGA	CGTGTTTGACTTTAATCAATACTATGT
Chromosome 9	9Bin25	76.916	BVWI00081	InDel		scaffold805	332938	333071	134	TGTTTTTCGTGTTGCTAAGAT	TTATTGATGTACATGATATGGGTAAT
Chromosome 9	9Bin25	76.916	BVWI00082	InDel		scaffold805	708051	708133	83	ATGTCGATAGCACATCGGTA	TGAAAGAAATTGCGTAGACCTG
Chromosome 9	9Bin25	76.916	BVWS02382	SSR	(GGC)7	scaffold805	855623	855781	159	GATGAAGCATGGTTGGGAGT	CTTTGCTCAGATGCCTCCTC
Chromosome 9	9Bin25	76.916	BVWS02353	SSR	(AT)9	scaffold390	1338628	1338901	274	TCGCACTCTTTATGTGCAGG	AAGTCCCAAAAGAACCCACC
Chromosome 9	9Bin26	77.858	BVWI00065	InDel		scaffold390	962088	962236	149	ATCTCCAAAGTTGCGTCCTG	TTCCCATGGGCTAAATGTTTC
Chromosome 9	9Bin26	77.858	BVWS02494	SSR	(TCC)7(CT)17	scaffold390	939385	939542	158	TGCCGTTTGGATCACATAGA	CAATACGCACAAAAAGCGAA
Chromosome 9	9Bin27	79.083	BVWS00209	SSR	(GA)17	scaffold390	923274	923400	127	TGCTTCAAAATCTATTCACAATTTGC	TTCTTGGTTTCGGGTTTCTTTACA
Chromosome 9	9Bin27	79.083	BVWI00063	InDel		scaffold390	20004	20145	142	GCAGTTTTGAGGACACTTGG	GGAGTCTACCAGAAACCGTAAT
Chromosome 10	10Bin1	0	BVWS02403	SSR	(ATG)8	scaffold659	1470019	1470254	236	AAGCCTTTTCTTCCTCCTGC	TCCAAAGCAAAAGCAAAAGC
Chromosome 10	10Bin1	0	BVWS02481	SSR	(ATC)7(AAG)6	scaffold659	1003035	1003219	185	AAACCCTTCCAATCTTTTCCA	AGACAAATCTGGTTGAGCTGG
Chromosome 10	10Bin2	3.876	BVWS00236	SSR	(CA)18	scaffold659	1007583	1007748	166	CTTGAGCATTTGGCTTCCTAGTGT	GTCAAAATGTCCTTTGATTCCCAA
Chromosome 10	10Bin2	3.876	BVWS00269	SSR	(CT)12	scaffold45	458468	458579	112	GACACCTTCACAATCACAATCTGG	ACCACCTGCAAAACAAATTTTCAA
Chromosome 10	10Bin2	3.876	BVWS01478	SSR	(AG)6	scaffold45	775997	776272	276	GTGCAACTCTGGGAAAGGAG	AGGGAAATAATGGGGTTTGG
Chromosome 10	10Bin3	8.022	BVWS01136	SSR	(TG)7	scaffold45	1319534	1319705	172	TTGGTCATCAAGGGGGTTAG	AAAACTTGCATTCTCAATTTTCG
Chromosome 10	10Bin4	10.729	BVWV00055	SV		scaffold512	26231	27274	1044	AGGCTTTTCTGTATGGAACT	GAATATGTAGTTTATGCTTTATTCCTT
Chromosome 10	10Bin4	10.729	BVWV00056	SV		scaffold512	27647	28513	867	GCATATTGAACGCAATTATCAAGT	ATTTGCAAGCTCTCCTGTCC
Chromosome 10	10Bin5	12.25	BVWI00067	InDel		scaffold512	202456	202589	134	AGGGATCAATTAGCCCAAGA	TTGATGATGTGGATGTGGGT
Chromosome 10	10Bin6	18.076	BVWS02375	SSR	(TGC)7	scaffold253	1084324	1084490	167	CAGTGAGGCATGGCAGTAGT	GCCAAGAAAGCACCAAATCT
Chromosome 10	10Bin7	18.656	BVWS02400	SSR	(TC)7	scaffold253	705249	705516	268	TAGCCTCAGCCTCAGGGAAT	CTTGGAGCGAGAAGGATGAG
Chromosome 10	10Bin8	19.198	BVWS00079	SSR	(CT)21(TCT)7	scaffold155	1024870	1025019	150	CCTCATGCCATGTCCTCAGTAAG	GCTGCAGCTCTATATGCTTCTTCA
Chromosome 10	10Bin9	21.587	BVWS02304	SSR	(TCC)6	scaffold155	777053	777213	161	AATGGCAGAAGAAAGCATCA	CTGGGTTGTCTTGTCGGTTG
Chromosome 10	10Bin10	23.094	BVWS02436	SSR	(AC)6aaaattggaaaaataataattaa(AAAT)8	scaffold155	562738	563028	291	GATGATTTGTTTGTTCTGATCTTTG	AAACCATCACTGAGAACAAAAGG
Chromosome 10	10Bin10	23.094	BVWS02454	SSR	(AAT)9	scaffold155	542664	542829	166	AATCTTCCCCATGCCAAAAC	GACTTCCAAACCCTCCCTTC
Chromosome 10	10Bin10	23.094	BVWS02458	SSR	(AT)3	scaffold155	516167	516328	162	CAAACAAAAACTTAGGAACTAGATTG	TTAGCCATGAGGCGTGTACC
Chromosome 10	10Bin11	24.87	BVWS00711	SSR	(AT)9	scaffold37	372887	373020	134	TGCGACTTGAATTTTCTTGC	CATCTGACAGGTCCAAGAATGA
Chromosome 10	10Bin11	24.87	BVWS00712	SSR	(TC)8	scaffold37	608524	608776	253	TATTGCTCTGCCCCCAATAG	CAAGTGAATGGCCCAAAAAT
Chromosome 10	10Bin11	24.87	BVWS01407	SSR	(TTA)9	scaffold37	715705	715929	225	TTTTGCTCGATAATTGTGTGTTG	AACACTCGTTTGGGCTTTGA
Chromosome 10	10Bin12	35.69	BVWS01178	SSR	(AT)10	scaffold13	281538	281765	228	CGGAGTGGGAATAAGCACAT	CCGAGATATTGGGCAACCTA
Chromosome 10	10Bin12	35.69	BVWS00686	SSR	(TA)7	scaffold13	488059	488317	259	TTTTGACTAGGTCTAAGATCCAATTT	TGATGTCAAACCCATAGAAACG
Chromosome 10	10Bin12	35.69	BVWS00844	SSR	(AG)7	scaffold13	589804	589933	130	CCCAATGTGAGAGGTGGTTT	ATGGATTGTGATGGCTGTGA
Chromosome 10	10Bin12	35.69	BVWS00533	SSR	(TTA)6	scaffold13	814725	815001	277	TGGTTGCAATTTTAACCTCAA	TCCCAATAACCATTACCCGA
Chromosome 10	10Bin12	35.69	BVWS00932	SSR	(TA)6	scaffold13	882191	882445	255	TTGAATTTGAGAGGCAAAATGA	GACGACAACGTGTTGCAGAG
Chromosome 10	10Bin12	35.69	BVWS00931	SSR	(TATT)5	scaffold13	982159	982336	178	TTTGCAAAGGTGTTTGTTCC	TCACACCAAGCAGACCTTTG
Chromosome 10	10Bin12	35.69	BVWS01039	SSR	(TA)9	scaffold13	1215392	1215597	206	AATGCCCGACATAATTGAGG	GCAAAATGGTGGCTAGGTGT
Chromosome 10	10Bin12	35.69	BVWS00757	SSR	(TA)9	scaffold353	208521	208799	279	TCCACTGGAAATGCTTTTGA	CGGTGATAATTAAGGAACGTGA
Chromosome 10	10Bin12	35.69	BVWV00043	SV		scaffold377	288622	289444	823	TGTTCTCGATAGCCGTTTCA	ATCCACTGGTTGCGTTAGAT
Chromosome 10	10Bin12	35.69	BVWI00057	InDel		scaffold377	289908	290021	114	GTATTGTTTGGGTCGAATGC	TGCCTAAATCTGTCGGAAAC
Chromosome 10	10Bin12	35.69	BVWI00136	InDel		scaffold237	17111	17209	99	TTAGTTTTGTTCATCCCACTG	CACAAACATGAGACAACCTT
Chromosome 10	10Bin12	35.69	BVWS00819	SSR	(TA)9	scaffold237	140194	140460	267	GGGTGGATGTAGCCAAGAAA	CAACTACGTCCAACGCATTTT
Chromosome 10	10Bin12	35.69	BVWS00618	SSR	(AAAG)8	scaffold412	567675	567954	280	TGTTTGATGCTCTAATGCCC	TGCATTACTGTGTGAAATGACC
Chromosome 10	10Bin13	36.29	BVWS00903	SSR	(TA)7	scaffold412	55133	55393	261	CACTCGAACTTAGACTCCCCC	TGTGGTGGCACGACTTCTAC
Chromosome 10	10Bin14	37.983	BVWS00542	SSR	(CA)6	scaffold135	299274	299466	193	GCATGCACACACAGACACAG	TAGTCCTGCATGTGCCAATC
Chromosome 10	10Bin14	37.983	BVWI00219	InDel		scaffold135	319215	319363	149	GTTCTAACTCTCCTCCTAAGGATT	TTTGTCACTGCCTAAATGGC
Chromosome 10	10Bin14	37.983	BVWI00036	InDel		scaffold135	1163849	1163998	150	AAAAGAAGGGTGAGATCTTTATCAT	GAAAGGGTGGGAATTGCAGA
Chromosome 10	10Bin15	39.57	BVWI00102	InDel		scaffold147	134856	134989	134	GGGGGTGTGTTGAAGTATGA	TTATCTTCTTCCCTTCTATAAATTGC
Chromosome 10	10Bin15	39.57	BVWI00045	InDel		scaffold147	136652	136801	150	CTTATACTTTATACTCTGTCTCAAAAG	CTCATATGCCCATGTTGTGA
Chromosome 10	10Bin15	39.57	BVWI00141	InDel		scaffold218	81371	81492	122	TGGTTGTCCTTGTAGTCGAT	CCCTAATGCTCTAAGTTGGC
Chromosome 10	10Bin16	40.255	BVWI00339	InDel		scaffold218	216057	216196	140	GCTCGTAAATTTAGCTGCATTATTA	CTAAACCATCAAAGGTGCAGT
Chromosome 10	10Bin16	40.255	BVWS01442	SSR	(TTA)6	scaffold218	259326	259599	274	GTCGGCTTCCACAAAAAGAA	GGCCATTTTCTTGAGCCTCT
Chromosome 10	10Bin17	42.898	BVWV00045	SV		scaffold386	45875	46817	943	AGTTTATAGGTGGCACTAACA	AAAGTAGGTTGAGAGAGTACG
Chromosome 10	10Bin17	42.898	BVWV00046	SV		scaffold386	86223	86833	611	GGAGACATCCCTGAGATTAGA	AAATAATGAAATCAATAGCCTGGA
Chromosome 10	10Bin17	42.898	BVWV00072	SV		scaffold386	198468	199202	735	AAAAATAGGGCAGTGTCGATT	CACATGGCATTAAGAGTAGCTT
Chromosome 10	10Bin17	42.898	BVWI00059	InDel		scaffold386	350890	350987	98	AGGAAACGCATTCACATAGC	ACTAGAGTTTTCGAGAATAAAGAGTT
Chromosome 10	10Bin17	42.898	BVWI00027	InDel		scaffold104	1435332	1435473	142	ACTTTTCTTCAGAACGATTGTAGT	CAGCTTATTTAGAATGCAGAATGTAG
Chromosome 10	10Bin18	45.802	BVWI00025	InDel		scaffold104	129568	129711	144	ACACATACAACAACTTTAGATGA	AGTAGAGTAAAACAGACTACCAA
Chromosome 10	10Bin19	46.781	BVWS00867	SSR	(AC)8(AT)6	scaffold315	125737	125991	255	AAAATCTGAAGATGTTTCTACCTCTAA	CCTTTGTCATGCGGTAAATTC
Chromosome 10	10Bin19	46.781	BVWI00154	InDel		scaffold315	356167	356311	145	CATCACTCGTACACGTAATAAA	GTGCACATTTATCTAGTAGGC
Chromosome 10	10Bin20	49.399	BVWS02048	SSR	(CTTCAA)6	scaffold300	5720256	5720504	249	TCTGTGTGGATGCAAATGGT	GCTAATCGAGCCCAGTTACG
Chromosome 10	10Bin20	49.399	BVWS00262	SSR	(AT)13	scaffold300	4449956	4450088	133	CACACTTGTGTCATTTGCACATTTT	TAATCTCTTCACCCATCCCAAAAC
Chromosome 10	10Bin20	49.399	BVWS02247	SSR	(TG)4	scaffold300	4311036	4311303	268	ACTACCTTAGATTATAAGGGC	GGAGAACTTCGACTTTAGAC
Chromosome 10	10Bin20	49.399	BVWS02342	SSR	(CTTTTT)6	scaffold300	3752382	3752564	183	GCAACTCAGAATCCTCGTCC	CTTCCTTCGACATTTCTCGG
Chromosome 10	10Bin20	49.399	BVWS02357	SSR	(TGA)5	scaffold300	3108697	3109495	799	TCATCCCTTTCCAATGCTTC	ATCAAATTGGAAGCTGCGTT
Chromosome 10	10Bin21	50.089	BVWS02396	SSR	(AAG)13	scaffold300	3089233	3089369	137	TCGCTTCTTAAACCCTCAACA	CCACGACGAAGAAGAGGAAG
Chromosome 10	10Bin21	50.089	BVWS02397	SSR	(AGA)10	scaffold300	3088926	3089292	367	GCTTCCGTTGCTACTTCTGG	GCACGCCACAATTACTTCCT
Chromosome 10	10Bin21	50.089	BVWS00850	SSR	(AAT)5	scaffold300	1074878	1075129	252	TGGCCCAATATTTTGAAGTTG	AAGTCTTTATTGTGGATTTATTGTTGA
Chromosome 10	10Bin22	52.71	BVWS00435	SSR	(ATT)12	scaffold1318	631165	631417	253	GGATGTGGATGTAGCCCAAT	AGCCAAATGACTTAACCACCA
Chromosome 10	10Bin23	55.01	BVWS00257	SSR	(ATT)8	scaffold1318	465789	465916	128	CGTTTCATGCGACACTTTTTATTT	TGGGAGTGATTAGGTGTAGCTTAGA
Chromosome 10	10Bin24	57.219	BVWS02263	SSR	(TTC)3	scaffold242	57966	58777	812	TGGGACTTGAACCTTCTT	CACAATCAACACTGCTCC
Chromosome 10	10Bin25	61.322	BVWI00289	InDel		scaffold242	208786	208895	110	AAATAAAATTGAATGTATCCAAAAACG	TTGAGAGCGAGTGACCTTTA
Chromosome 10	10Bin25	61.322	BVWI00290	InDel		scaffold242	317202	317351	150	CAAAACTATCCTTCGAAGTAACAGAC	CCGACAGGGTTACTGCTTGA
Chromosome 10	10Bin27	63.506	BVWS02005	SSR	(CCT)5	scaffold242	822753	823000	248	ATTGCTCGTTTGTTTCCTGG	TGAGTGGTAGTGGTGGTGGA
Chromosome 10	10Bin27	63.506	BVWI00292	InDel		scaffold242	896438	896580	143	TTCCAAGCACCTCGAAAACA	TTTCCTTTCAACGTTCTCATCA
Chromosome 10	10Bin27	63.506	BVWI00293	InDel		scaffold242	997238	997361	124	GATTAGCGAGTACCCTCCTT	GTGCACATATCCTCGTAGGT
Chromosome 10	10Bin27	63.506	BVWI00286	InDel		scaffold242	1005231	1005364	134	GAATAAATGATTGCTGTAACTTGGAT	CTAACGTGAAACCGTCCACA
Chromosome 10	10Bin28	64.644	BVWI00294	InDel		scaffold242	1379143	1379245	103	CAGGAATCACCTGTTACCCA	CGAGAACTTATATTTACAACAACGATT
Chromosome 10	10Bin29	69.107	BVWI00295	InDel		scaffold242	1845111	1845258	148	AGAAATTTAGAACGTTAGACGAAGT	AATGGCCAAGTCCCACTTTC
Chromosome 10	10Bin29	69.107	BVWI00296	InDel		scaffold242	2126667	2126799	133	CAATGAAAGTTCAATTCCTACGC	ATGAGTGTCGCTGCTTTAGA
Chromosome 10	10Bin30	76.922	BVWI00297	InDel		scaffold242	2546248	2546393	146	CAATTCCCTATCCCTTCTCGT	GTTGGTGTTGAAGCAGCTAT
Chromosome 10	10Bin30	76.922	BVWI00298	InDel		scaffold242	3238532	3238650	119	CTTTAATAATCGCCTCAATGCTT	TTCTGATGTAGAGGCAGATGA
Chromosome 10	10Bin31	79.79	BVWS02251	SSR	(CCA)6	scaffold242	2611209	2611489	281	AGGGTTCAGCACAAGGGAGT	CCAGATGGAGGGAAAGAAGG
Chromosome 10	10Bin31	79.79	BVWS02261	SSR	(AC)3	scaffold242	3365049	3365279	231	CAACATTACCCTTACCTGG	AGTGCGTGATGCTGCTAG
Chromosome 10	10Bin32	82.906	BVWS02205	SSR	(AT)13	scaffold242	3642916	3643031	116	CAAAATTGTGGGAGGAAAAA	TGGAGTGGTAGCGACTAAAACA
Chromosome 10	10Bin33	86.111	BVWS02348	SSR	(TC)8	scaffold242	3847947	3848097	151	AATGGGAGAGGTGGCTTTCT	TTAGCGGGTGATTCTTCCAC
Chromosome 10	10Bin34	89.222	BVWS02356	SSR	(AAG)8	scaffold242	4212830	4213099	270	TGGTTTTGGACAAGAGGAGG	TAAATGAAAGCCCCAAGTCG
Chromosome 10	10Bin34	89.222	BVWS02369	SSR	(CTT)10	scaffold242	4968138	4968502	365	GGTCCCCCTTTTCACAGAA	AATTCCGACAACGGAATCAG
Chromosome 10	10Bin35	90.273	BVWS02333	SSR	(AAG)5	scaffold242	4863306	4863408	103	GGGGGTTTTGGTTTCTTGAT	ATGATGTCACCATTACGGGG
Chromosome 10	10Bin36	91.659	BVWS02216	SSR	(AT)9	scaffold242	4539004	4539196	193	GGCCACTCCGACAAAATTAG	TCGCTGCAGTAGAATTTTATCAC
Chromosome 10	10Bin36	91.659	BVWS02211	SSR	(TTA)8	scaffold242	4711928	4712162	235	GCAAGAATTAATTGCATCCACA	GGAAGGTTCCCAAGAAAAGG
Chromosome 10	10Bin36	91.659	BVWS02210	SSR	(TA)12	scaffold242	4718447	4718651	205	CCTTCATGTTCATGGTGTGG	TCACGGGCTAATCCTATGTTG
Chromosome 10	10Bin37	92.401	BVWS02213	SSR	(ATA)15	scaffold242	4555605	4555789	185	ACAACAACCAAAGGGAGTGG	CCACCACCTGCTTTACCATT
Chromosome 10	10Bin37	92.401	BVWS02212	SSR	(AT)10aaaata(TC)37	scaffold242	4592440	4592688	249	TTCCTAAATGCACCAAACCC	GGGAGGAAAATTTTGGGAAA
Chromosome 10	10Bin37	92.401	BVWS02215	SSR	(GA)13	scaffold242	4646132	4646318	187	AACCTGAGAAGGGAAGGGAA	TGAACTTGTGGAGGCAAAAA
Chromosome 10	10Bin37	92.401	BVWS02209	SSR	(AAAT)5	scaffold242	4808379	4808568	190	ATTCGACCTTTTGCACTTGG	TGGCTCAAAGGTATGGATGA
Chromosome 10	10Bin37	92.401	BVWS02214	SSR	(AGAGGA)6	scaffold242	4853707	4853980	274	ACGAGACGCCTGACATTCTT	GAGGCCTTTGTCGTTTTGTC
Chromosome 10	10Bin37	92.401	BVWS02208	SSR	(ATA)6	scaffold242	4931934	4932164	231	ATCGTTCCCATTCACGAAAA	ATAAGTTTGACACGCCGGAC
Chromosome 10	10Bin37	92.401	BVWS02207	SSR	(AATA)5aagattaggtactattggtttaaa(AAT)11	scaffold242	4939381	4939623	243	ACACCTACCGCTCAATTTCA	CAAAACGGCATAATCCAACA
Chromosome 10	10Bin37	92.401	BVWS02206	SSR	(AAT)6	scaffold242	5059302	5059492	191	CGAAAAGGTGAATGACCTCC	CTCATCCTCTGGTGTGTCCA
Chromosome 10	10Bin38	93.03	BVWS02303	SSR	(AT)5	scaffold242	5150923	5151150	228	TTCTGTCCCCGGAAACAATG	CACAACCCTCGCTCCACTTT
Chromosome 10	10Bin39	94.883	BVWI00288	InDel		scaffold242	5757405	5757526	122	AACAGGAGCTCCCCCATTTT	AATGAGAGTATGTATCGTTGTTTTCA
Chromosome 11	11Bin1	0	BVWI00348	InDel		scaffold143	126757	126906	150	GAAAAATTATGTGAGTAATTGAATGG	TGGTTGAGTTGGTTTAGTATTTTA
Chromosome 11	11Bin2	1.252	BVWI00347	InDel		scaffold143	51207	51355	149	GAAATAACTAAAGTACGGGGATG	TCAAATATGAAATAGGAATGGAATGTA
Chromosome 11	11Bin3	2.249	BVWS01914	SSR	(TA)6	scaffold226	399841	399950	110	GGGTTTCAATTTGTTTGAGCA	AAACAGAAAGGGGCAGATGA
Chromosome 11	11Bin3	2.249	BVWS00284	SSR	(AT)10	scaffold226	501171	501330	160	CAGACCAAACTCACCAAAGTACAAG	TCTCCATTTCCAGATTTGATTTTGT
Chromosome 11	11Bin3	2.249	BVWS00040	SSR	(GA)14	scaffold226	553441	553594	154	ACAGAATCCCAATCCATTGAAGAA	TCACTCACTTCACCTTCGAAACAC
Chromosome 11	11Bin3	2.249	BVWS00067	SSR	(AG)12	scaffold226	1340723	1340849	127	GCCCAAAGTAAAGCCCAATTTTAC	TCATTTAAGTAGGCCCCCAAGTTT
Chromosome 11	11Bin4	2.632	BVWS00288	SSR	(AG)13	scaffold84	890928	891072	145	TTGCCAACTTATCATGAAACAAAAA	AGAAACAATACAAAACCCAACCCA
Chromosome 11	11Bin4	2.632	BVWI00206	InDel		scaffold84	1147052	1147200	149	ACTTGTTACCCTCATCTAACA	ACATATTAATGAAAACTTAGTAGAACG
Chromosome 11	11Bin4	2.632	BVWI00341	InDel		scaffold84	1769318	1769458	141	CAAATAGCTAATGGAATGGCTT	ATTAACTTAGAAAAACACGTACATC
Chromosome 11	11Bin4	2.632	BVWS00795	SSR	(GAA)5	scaffold84	1897782	1898061	280	TGTGGAAGGGAGAAGAAGAGA	GGCTCGTGGTCCAAATTTAC
Chromosome 11	11Bin4	2.632	BVWS00480	SSR	(AT)7	scaffold84	1932480	1932757	278	ATGGCGAAATTGAATCAAGC	TTGAACAAGTAAATAAGTTCATAGCGA
Chromosome 11	11Bin4	2.632	BVWS01346	SSR	(TA)7	scaffold84	2635980	2636145	166	ATGGCCCATGTTTGTCTCAT	CACCAGACGTTGTCACCATT
Chromosome 11	11Bin4	2.632	BVWS01577	SSR	(TA)14	scaffold84	2877974	2878213	240	GCACTGGCTGATCCTTAGGT	AAACTCAAGTCATTGCTTTTCAA
Chromosome 11	11Bin4	2.632	BVWS00667	SSR	(AC)6aa(AAT)9	scaffold84	3004319	3004539	221	GTTCACAGGCATTGAACCCT	CACCACCCTTGAACTATGGG
Chromosome 11	11Bin4	2.632	BVWS00668	SSR	(CT)13	scaffold84	3023327	3023578	252	CATAGCGGCGTTTCTTGAAT	GCTCGAAACGAATTTAAGCG
Chromosome 11	11Bin4	2.632	BVWV00031	SV		scaffold86	69376	69965	590	AGAAGTGTCCAGGATATTCAC	GAAGAAGCTGAACAGGTGAC
Chromosome 11	11Bin4	2.632	BVWV00032	SV		scaffold86	69655	70371	717	AAATTGAGTTAGGGCGAACC	GTGCAGAATGCGTGATCATA
Chromosome 11	11Bin4	2.632	BVWS01357	SSR	(TA)7	scaffold86	76569	76767	199	GTCGTGGCTTCTTTTCTTGC	ATGGTCTCCATTGTTCCCAG
Chromosome 11	11Bin4	2.632	BVWS00084	SSR	(GA)17	scaffold181	616693	616858	166	CAGTTCACAGGATACACAAATGCC	TATCATCAGTTCAATGGGAAGACG
Chromosome 11	11Bin4	2.632	BVWS02294	SSR	(TCT)3	scaffold181	736459	736711	253	TCAATCACTTCCCACCCC	CTCGCTGAGGACACCATACT
Chromosome 11	11Bin4	2.632	BVWS01119	SSR	(CT)6	scaffold181	796015	796237	223	CCGGGTTGAGAGAGAGTGAG	CGGGTTGTTGGATTTTCTGT
Chromosome 11	11Bin4	2.632	BVWS00813	SSR	(AT)12	scaffold181	1032237	1032493	257	CCGTGTTTTAGGCCAATCTT	CCATTGAACGTAAACATGGGT
Chromosome 11	11Bin4	2.632	BVWS00126	SSR	(AT)11	scaffold212	677336	677495	160	TGCTCAGAAGTCAATCGTCAAATAA	TGGTGCCTTTACAAGCTTTTAGGT
Chromosome 11	11Bin4	2.632	BVWS02008	SSR	(AGAAG)6	scaffold212	747065	747207	143	AAAGTGTGTTTTAGTGGGAAGAGT	TTCCCGGCATCTGAATTATC
Chromosome 11	11Bin4	2.632	BVWI00139	InDel		scaffold224	22062	22172	111	TTTGGAAAGATCCCTTAAATTAATAAC	GCCTAGGGGAAGTTAGACAA
Chromosome 11	11Bin4	2.632	BVWI00140	InDel		scaffold224	106637	106769	133	TGTTGAAGACACTATAACATGC	CCACATGGATAATTCGAACAC
Chromosome 11	11Bin4	2.632	BVWS01113	SSR	(ATTT)5	scaffold587	126129	126408	280	TCAAATGGGGGATCTCAATTA	TGACTCTAAGGCGCTCCAGT
Chromosome 11	11Bin5	3.201	BVWS01362	SSR	(AT)6	scaffold14	87809	87922	114	CATGGTTTGACAAAACCTTCA	AAAAGTTAGAATCCATGCCCC
Chromosome 11	11Bin5	3.201	BVWS00554	SSR	(TC)6	scaffold14	364569	364746	178	GGATGGATTTGTGCAGCTTT	CGATCTATTGCGATCTGTCGT
Chromosome 11	11Bin5	3.201	BVWS01596	SSR	(TGTTTT)5	scaffold116	1740133	1740296	164	GGGTGGTTCTGTGATGCTTT	CCCCAGCTCTTACACCAAAA
Chromosome 11	11Bin6	4.567	BVWS01139	SSR	(TCT)5	scaffold116	1131461	1131649	189	TCCATCCAAATTTAGCTTCCA	TCAGACATGGATTTTCCACAG
Chromosome 11	11Bin6	4.567	BVWS00895	SSR	(TTTA)6	scaffold116	53808	54087	280	CCAAAAAGCCAATACTAGATGGT	CCTTCTCTTCCACTCCAAACA
Chromosome 11	11Bin6	4.567	BVWS01973	SSR	(GAA)11	scaffold88	110260	110525	266	GTCGGAGCACGCTATTTTGT	AAATTCCGATTAAGGTGGGG
Chromosome 11	11Bin6	4.567	BVWS00429	SSR	(AGA)5	scaffold88	449969	450182	214	AGCAAGCAGAAGAAGAAGCAA	AATTTTTCCTCCACACACGC
Chromosome 11	11Bin6	4.567	BVWS00246	SSR	(TG)12	scaffold88	490261	490411	151	GTTGGGTTTGATTAAAGCAAGTGG	GGCGAAGAAGTAGAGGAAACCCTA
Chromosome 11	11Bin6	4.567	BVWS02456	SSR	(ATA)7	scaffold88	1044437	1044618	182	AGGTGGTATGTCGCTCATCC	GTGGGAGATGTGTGAGCTTG
Chromosome 11	11Bin6	4.567	BVWS02457	SSR	(CTT)11	scaffold88	1062383	1062509	127	TGCTTAAACCTCCGTTCTGG	ATTTTCTTCAGCTGCGTTCC
Chromosome 11	11Bin7	5.337	BVWS00592	SSR	(CA)6	scaffold56	41913	42123	211	AGCATGGATAAAGCATGGGA	GACCGATTGATGGCTTTTTG
Chromosome 11	11Bin7	5.337	BVWS01550	SSR	(TC)6	scaffold56	360074	360328	255	ATATTGTAGGGGAGTGGGGG	TGCGTCCTGTTTTCTTTCCT
Chromosome 11	11Bin7	5.337	BVWS00976	SSR	(TAA)5	scaffold56	656423	656647	225	TGCTGATTTTTGGAAGATGAAA	CCTTGCAAAGAGAATAGCGG
Chromosome 11	11Bin8	12.294	BVWS01930	SSR	(CCTT)10	scaffold56	1370675	1370946	272	GCTGTGCCAAGGAAAGAAAG	TCAAAGCCAAACAGAATCCC
Chromosome 11	11Bin8	12.294	BVWS02359	SSR	(GAAG)10	scaffold56	1370675	1370846	172	CAGAAGAGCTTGTGTGCCTG	TCAAAGCCAAACAGAATCCC
Chromosome 11	11Bin8	12.294	BVWS01824	SSR	(AT)6	scaffold56	1959096	1959287	192	CCTCCTACCCCCAATCGTAT	AAGGGCAGACGACTCAAAAA
Chromosome 11	11Bin8	12.294	BVWS01107	SSR	(ATA)9	scaffold56	1999434	1999640	207	CCGTCGTGACTTTTCAAGTG	TCTAGAGAGAAAAGTGAGGGAAAAA
Chromosome 11	11Bin8	12.294	BVWS02443	SSR	(AG)11	scaffold56	2044199	2044391	193	AAAGTTTTCATGCCAACGTATC	TCAGCCAATATGGTCAAATAGC
Chromosome 11	11Bin8	12.294	BVWS02401	SSR	(AAT)13	scaffold56	2628106	2628309	204	AAACCGACCTCAACCACTTG	CGAAACAAATAAGAAAATTGAAGAG
Chromosome 11	11Bin8	12.294	BVWS02337	SSR	(AT)8	scaffold56	2932758	2932870	113	CCCAAAGCTAAAGGTGTTTCA	CAAAACATTGGGTAGATGAGAAAA
Chromosome 11	11Bin8	12.294	BVWS02407	SSR	(AG)8gaaaaactggaaggagagatccacaaaaagaag(GA)15	scaffold56	3286399	3286602	204	GCGAAGCTTGAAGTTGATCC	AAGCTTATTGCAACCATCCG
Chromosome 11	11Bin8	12.294	BVWS00075	SSR	(CT)10	scaffold56	3508685	3508835	151	GCACTGATGAGCTTAGCCTAGGAG	GAATTTTCTGAGGCTTTCATGCTG
Chromosome 11	11Bin8	12.294	BVWS00076	SSR	(GA)14	scaffold56	3511529	3511684	156	GAAACTGTCTGATGCCTCTCGTTT	ATGTCGACTTCAAATCGTGAACAA
Chromosome 11	11Bin8	12.294	BVWS02297	SSR	(AAT)4	scaffold56	4196562	4196837	276	TTACAACTGGCAGGTAAA	ATTGAGAAGCAAGTGAAG
Chromosome 11	11Bin8	12.294	BVWS00069	SSR	(AG)11	scaffold56	4540439	4540563	125	GGAAGATTTGATCTCCACTTCTCCA	GTAGGCTGATCTGCTCTGCTTGTT
Chromosome 11	11Bin9	18.197	BVWS02310	SSR	(TC)15	scaffold56	5381145	5381366	222	GCTTCCAAACCACATTCATT	TCCTTCCAATTTCATCATTC
Chromosome 11	11Bin10	19.472	BVWS02431	SSR	(CAG)7	scaffold56	5909394	5909519	126	TGGTTTGGGACAAAGGCTAC	GGGTGACTGAGAGAAGGCTG
Chromosome 11	11Bin10	19.472	BVWS02331	SSR	(TC)5	scaffold56	6387062	6387281	220	GTTCTCGTTCCAGGTCCATT	AGCAGACTCCCAGGCATAAA
Chromosome 11	11Bin10	19.472	BVWS02350	SSR	(AAG)14	scaffold56	6838855	6839104	250	AGATGGCCTATTCCAGGTCC	CCAACCATTCATTTTCTGGA
Chromosome 11	11Bin10	19.472	BVWS02429	SSR	(TC)8	scaffold56	7768686	7768964	279	AAGGCAAGCCAAAGTCTCAA	ACACCCTGCAATTTCTGAGC
Chromosome 11	11Bin10	19.472	BVWS01740	SSR	(TA)16	scaffold56	8380449	8380698	250	AAAAACCAAAACATGTCTGATAATTG	TGCAATAGATCGCAATAGAGGA
Chromosome 11	11Bin11	28.615	BVWS02393	SSR	(TTTA)5	scaffold31	242051	242315	265	TCTCATGCACTTTGTTTGGG	CGTGGGATATCAAAGCCACT
Chromosome 11	11Bin11	28.615	BVWI00008	InDel		scaffold31	416411	416548	138	TTTAAACTCCGAGCAAGACA	AATTTCAGAGCTATTCTTCGTC
Chromosome 11	11Bin11	28.615	BVWS02449	SSR	(CTT)9	scaffold31	832227	832511	285	AATGTTAAGCAGTAAGCACATGG	ACACCGGAGAAGGTGAATTG
Chromosome 11	11Bin11	28.615	BVWS02317	SSR	(AG)14	scaffold31	856237	856535	299	GGACCAACATACAGATAAGC	TTACATATACATGAAAGCAG
Chromosome 11	11Bin11	28.615	BVWS02242	SSR	(GGT)5	scaffold31	1502144	1502385	242	ACGGAACAGAGTAAACAGAGC	AGGTGGATACGGAGGAGGTG
Chromosome 11	11Bin11	28.615	BVWS00165	SSR	(CT)21	scaffold31	1822081	1822201	121	AGCGTACCTTCACAGAGTCCAATC	TTCAGCCTTTCACCTTCATTTCTC
Chromosome 11	11Bin11	28.615	BVWS00228	SSR	(AG)23	scaffold31	2168073	2168228	156	GGAAGAGTGAGGTGATAAATCAATATGT	AATTGGCCCAAATATCCATATGAC
Chromosome 11	11Bin12	30.696	BVWS02320	SSR	(AT)8	scaffold31	3350746	3350952	207	AGAGGAAGAACAGAGTGGAG	GAGAAGGAATGAGAAGAAAC
Chromosome 11	11Bin12	30.696	BVWS00064	SSR	(GA)14	scaffold31	4387876	4388026	151	GTTTTGTATGTAAGCCGAGGTTGG	GACGTGAGTTTATATATGCGCGG
Chromosome 11	11Bin12	30.696	BVWS00014	SSR	(AG)20	scaffold31	4515920	4516061	142	GAAGTCTGAGTGATCCACAATTCG	TTTCACCTGTTCTCAAACCAAACA
Chromosome 11	11Bin12	30.696	BVWS00013	SSR	(A)27(G)16	scaffold31	4610905	4611089	185	TTTCCCCATGCCCTTAGGTTATTA	AGTGAAAATAACATCCCCCAATCC
Chromosome 11	11Bin12	30.696	BVWS02414	SSR	(AAC)7	scaffold31	5096121	5096243	123	CCGCATGTAGCGATTACCTT	TGTGGTGGGACGTTGTAAGA
Chromosome 11	11Bin13	32.722	BVWS00383	SSR	(CA)10	scaffold324	463397	463556	160	TTCCACTTTGTTTTGAGTTTGCTT	AATTCTTCAACATCCAACTCCCAT
Chromosome 11	11Bin13	32.722	BVWI00051	InDel		scaffold324	334723	334820	98	GGATCTCTTAATGCGTAGTTGG	AACTCTGAAGCCAAGAGTGG
Chromosome 11	11Bin13	32.722	BVWI00050	InDel		scaffold324	184918	185054	137	ATGCTCTACACCACGATCCA	GAAGAAGCTTCCCCCTCCTT
Chromosome 11	11Bin14	35.306	BVWS01709	SSR	(AAG)5	scaffold324	244803	244987	185	TGCTCTCGCTCTCATTCTGA	ACCTTCTCTTTTCCCGCAAT
Chromosome 11	11Bin14	35.306	BVWS00801	SSR	(AT)8	scaffold324	136730	137009	280	TGAATATAAGATTGATTCTCTTCGGA	GCATTTGTTTGGTGAATATGGA
